# Supplementary material for: A 16-gene signature associated with homologous recombination deficiency for prognosis prediction in patients with triple-negative breast cancer
Source: Open Med (Wars). 2022 May 11;17(1):882–96. doi: 10.1515/med-2022-0475 (PMC9096232; doi:10.1515/med-2022-0475)
Supplement: Supplementary Table [file med-2022-0475-sm.xlsx]

## Sheet: supplementary table 1
Supplementary Table 1. Differentially expressed genes between high-HRD and low-HRD groups
symbol	group	logFC	PValue	FDR
FAT3	protein_coding	-2.52713	5.04603e-16	3.97753e-12
IGF2	protein_coding	-2.33551	1.13781e-15	5.97917e-12
ACTA1	protein_coding	2.99055	5.27135e-15	2.07757e-11
TMPRSS11D	protein_coding	-3.24573	1.47473e-14	4.64982e-11
LRRN3	protein_coding	-2.17801	5.79002e-14	1.30399e-10
CGA	protein_coding	4.67284	5.74978e-14	1.30399e-10
ABCC11	protein_coding	-2.37037	7.55815e-14	1.48943e-10
SEZ6	protein_coding	-2.23917	3.80136e-13	6.65872e-10
HPGD	protein_coding	-2.1276	4.25582e-13	6.7093e-10
MUC6	protein_coding	-2.68034	1.40693e-12	2.01639e-09
FAM9C	protein_coding	-3.51359	1.72657e-12	2.08694e-09
CHRDL2	protein_coding	2.45046	1.59984e-12	2.08694e-09
CYP3A5	protein_coding	-1.47804	8.57784e-12	7.95468e-09
GPR52	protein_coding	-2.86938	7.99972e-12	7.95468e-09
POLR2F	protein_coding	1.6193	8.55042e-12	7.95468e-09
CRYBA1	protein_coding	-2.18415	9.41143e-12	8.24284e-09
CSAG1	protein_coding	3.51206	3.10211e-11	2.57393e-08
NCAN	protein_coding	3.31057	8.80891e-11	6.94363e-08
SNX22	protein_coding	1.53825	1.0044e-10	7.54015e-08
LRRC7	protein_coding	-1.3474	1.13704e-10	8.14794e-08
C21orf62	protein_coding	-1.6118	1.86945e-10	1.28139e-07
CLCA2	protein_coding	-3.16135	2.66023e-10	1.74744e-07
ZP2	protein_coding	-3.43045	4.05868e-10	2.5594e-07
ABCA12	protein_coding	-1.90295	5.54643e-10	3.36305e-07
KRT77	protein_coding	-2.92573	5.7868e-10	3.37885e-07
CRMP1	protein_coding	-1.43187	6.07602e-10	3.42101e-07
BTBD18	protein_coding	-1.70425	6.65578e-10	3.61822e-07
PAX1	protein_coding	2.39932	8.23966e-10	4.32994e-07
FSIP2	protein_coding	-1.85701	1.15571e-09	5.87734e-07
SLC35F4	protein_coding	-2.00341	1.26788e-09	6.24631e-07
MAGEA10	protein_coding	4.05194	1.53579e-09	7.33687e-07
CACNA1E	protein_coding	-1.57456	2.51278e-09	1.16512e-06
NELL2	protein_coding	-1.52658	3.49108e-09	1.57248e-06
FLG2	protein_coding	-3.08275	4.70244e-09	2.05928e-06
TSPAN11	protein_coding	-1.34672	5.07031e-09	2.16036e-06
STK32B	protein_coding	-1.23755	5.51623e-09	2.28851e-06
GSTA1	protein_coding	2.37332	6.58344e-09	2.54674e-06
DGKI	protein_coding	-1.36499	6.62331e-09	2.54674e-06
PAGE2	protein_coding	3.78411	6.97988e-09	2.61995e-06
ACAN	protein_coding	1.7881	7.96324e-09	2.91954e-06
ROS1	protein_coding	-2.04953	8.69664e-09	3.11597e-06
FGF21	protein_coding	2.53444	9.77957e-09	3.42611e-06
AADACL2	protein_coding	-3.16891	1.03534e-08	3.54829e-06
IRS4	protein_coding	-2.72961	1.23503e-08	4.1426e-06
C1QTNF7	protein_coding	-1.67331	1.31856e-08	4.33064e-06
S100A9	protein_coding	-1.98722	1.71868e-08	5.419e-06
GLDN	protein_coding	-1.57904	1.70356e-08	5.419e-06
PVRIG	protein_coding	-1.37149	2.04358e-08	6.1956e-06
GPR82	protein_coding	-1.3428	2.1131e-08	6.28547e-06
C9orf131	protein_coding	-1.96377	2.66433e-08	7.77836e-06
LOXL4	protein_coding	1.65984	2.87996e-08	7.96536e-06
CRLF1	protein_coding	1.90648	2.7946e-08	7.96536e-06
TAS2R31	protein_coding	-1.54882	2.84892e-08	7.96536e-06
PCDH19	protein_coding	-1.44607	3.22159e-08	8.6082e-06
MFGE8	protein_coding	1.29114	3.6659e-08	9.63215e-06
ST18	protein_coding	-1.31773	3.74906e-08	9.68916e-06
NRK	protein_coding	-1.49725	4.1188e-08	1.04731e-05
IAPP	protein_coding	-4.16092	4.24213e-08	1.06154e-05
SP6	protein_coding	-1.22484	5.0377e-08	1.22184e-05
SERPINB4	protein_coding	-2.57827	5.67961e-08	1.35665e-05
CADPS	protein_coding	-1.27581	5.91674e-08	1.3922e-05
KIAA0825	protein_coding	-0.908236	6.34467e-08	1.47094e-05
GDPD2	protein_coding	1.8421	6.52903e-08	1.49174e-05
SPAAR	protein_coding	1.56895	7.46659e-08	1.6579e-05
SMR3B	protein_coding	-5.33743	7.68592e-08	1.6829e-05
DLG2	protein_coding	-1.22554	8.82563e-08	1.88022e-05
MUC13	protein_coding	1.98202	1.01054e-07	2.12415e-05
CRHR2	protein_coding	-1.17049	1.03351e-07	2.12607e-05
FAM186B	protein_coding	-0.937411	1.03842e-07	2.12607e-05
SOAT2	protein_coding	-1.58259	1.07522e-07	2.17318e-05
DHRS2	protein_coding	1.98057	1.18248e-07	2.35972e-05
CALB1	protein_coding	-1.29048	1.24819e-07	2.45971e-05
TMPRSS4	protein_coding	-2.14994	1.27617e-07	2.48381e-05
HEPACAM2	protein_coding	-1.55259	1.42318e-07	2.73615e-05
CYP2F1	protein_coding	-2.75914	1.5948e-07	3.02915e-05
SLC35F3	protein_coding	1.67258	2.08148e-07	3.86054e-05
SERPINA5	protein_coding	1.75178	2.13905e-07	3.92117e-05
DISP2	protein_coding	-1.08526	2.16939e-07	3.93108e-05
LHX4	protein_coding	-0.966133	2.30262e-07	4.12508e-05
IGSF9B	protein_coding	-1.46609	2.6446e-07	4.63246e-05
CD160	protein_coding	-1.05873	2.6384e-07	4.63246e-05
TPPP2	protein_coding	1.5889	2.69473e-07	4.66841e-05
S100A8	protein_coding	-2.00856	2.82949e-07	4.84858e-05
XAGE2	protein_coding	3.72834	2.87442e-07	4.8726e-05
ATP6AP1L	protein_coding	-0.737067	2.94319e-07	4.93611e-05
CELSR3	protein_coding	-1.04774	3.06148e-07	5.08044e-05
C8orf34	protein_coding	-1.32409	3.40612e-07	5.47933e-05
MTUS2	protein_coding	-1.28667	3.39804e-07	5.47933e-05
STEAP4	protein_coding	-1.48194	3.447e-07	5.48909e-05
CYP2E1	protein_coding	-1.30255	3.54972e-07	5.59613e-05
SYNM	protein_coding	1.2366	3.93971e-07	6.14945e-05
SATB2	protein_coding	-1.1313	4.01436e-07	6.20454e-05
OGN	protein_coding	-1.72247	4.13803e-07	6.3336e-05
MT3	protein_coding	1.48257	5.04559e-07	7.50412e-05
NMB	protein_coding	0.906287	5.03534e-07	7.50412e-05
ARHGAP28	protein_coding	-0.923879	5.52149e-07	8.13516e-05
GPR18	protein_coding	-1.25814	6.22654e-07	9.00564e-05
SLC4A8	protein_coding	-0.994137	6.19283e-07	9.00564e-05
KCNIP4	protein_coding	-0.82336	6.70127e-07	9.51762e-05
ACSL6	protein_coding	1.56502	6.68666e-07	9.51762e-05
APOBEC2	protein_coding	-1.16539	7.06783e-07	9.9486e-05
GCNT1	protein_coding	0.945606	7.70669e-07	0.000107519
ADRA2B	protein_coding	1.14455	7.91355e-07	0.000109436
LUZP2	protein_coding	-1.62697	8.32124e-07	0.00011368
C11orf87	protein_coding	-2.01931	8.43676e-07	0.00011368
SGCE	protein_coding	0.822406	8.85469e-07	0.0001183
HGF	protein_coding	-1.14047	9.50624e-07	0.000123428
OMG	protein_coding	-1.0663	9.74763e-07	0.000123428
CCND2	protein_coding	-0.954392	9.59671e-07	0.000123428
GBP6	protein_coding	-1.50777	9.53614e-07	0.000123428
MTHFS	protein_coding	0.601242	9.78656e-07	0.000123428
TFAP2B	protein_coding	-1.9431	9.74514e-07	0.000123428
ADGRL3	protein_coding	-1.76959	1.02246e-06	0.00012793
PRSS41	protein_coding	2.83176	1.12227e-06	0.000139312
HSPB2	protein_coding	1.28212	1.21817e-06	0.000150034
KCNK9	protein_coding	1.57432	1.28709e-06	0.000156084
GABRA4	protein_coding	-2.65054	1.38098e-06	0.000166192
BAG4	protein_coding	-0.677444	1.49885e-06	0.00017901
GPR22	protein_coding	-1.76948	1.53214e-06	0.000181422
C1orf105	protein_coding	-1.71322	1.58224e-06	0.00018477
EPHA4	protein_coding	-1.14864	1.70999e-06	0.00019822
ADCYAP1	protein_coding	-1.93745	1.76e-06	0.000202317
GNRHR	protein_coding	-1.16432	1.82993e-06	0.000207546
GUCY1A2	protein_coding	-1.04263	1.89371e-06	0.000213245
SLC26A2	protein_coding	0.979452	1.91903e-06	0.000214564
C6orf163	protein_coding	-0.917033	1.94891e-06	0.000215511
SLC28A2	protein_coding	-1.1685	1.95484e-06	0.000215511
CYP3A7	protein_coding	-1.11023	2.01838e-06	0.00022097
SEC16B	protein_coding	-1.01833	2.06497e-06	0.000224512
FAM167A	protein_coding	-1.01465	2.08152e-06	0.000224761
PPFIA2	protein_coding	-1.20492	2.11892e-06	0.000225132
LALBA	protein_coding	3.30558	2.1278e-06	0.000225132
FLRT2	protein_coding	-1.14874	2.10244e-06	0.000225132
UPK3A	protein_coding	1.34126	2.16719e-06	0.000226263
HOXD3	protein_coding	-0.929023	2.16027e-06	0.000226263
NTRK3	protein_coding	1.651	2.18228e-06	0.000226284
MYOZ1	protein_coding	1.52456	2.1961e-06	0.000226284
MAGEA4	protein_coding	3.76749	2.36934e-06	0.000240985
S100G	protein_coding	-2.92808	2.35851e-06	0.000240985
CNGB3	protein_coding	-1.41948	2.42648e-06	0.000245215
RBP2	protein_coding	-1.32741	2.46235e-06	0.000246699
ITIH4	protein_coding	-0.794107	2.64178e-06	0.000261935
PAX2	protein_coding	-1.86374	2.6596e-06	0.000262053
AADAC	protein_coding	-1.68128	2.69487e-06	0.00026388
SH2D5	protein_coding	1.34208	2.86413e-06	0.000277336
NRIP1	protein_coding	-0.862171	2.86747e-06	0.000277336
ECEL1	protein_coding	1.47295	2.90347e-06	0.000279105
ALOX15	protein_coding	-1.50809	3.06158e-06	0.000289017
CLDN20	protein_coding	-1.20789	3.06076e-06	0.000289017
HOMER1	protein_coding	-0.702441	3.11285e-06	0.000292107
PLEKHG7	protein_coding	-1.48839	3.13193e-06	0.000292159
EGFR	protein_coding	-0.918801	3.27858e-06	0.00030301
POU5F1	protein_coding	0.841052	3.31845e-06	0.000304159
VAX2	protein_coding	1.04807	3.38933e-06	0.000307158
ACSBG2	protein_coding	-0.871384	3.43969e-06	0.000309867
GP2	protein_coding	2.30843	3.46374e-06	0.000310261
PLA2G4E	protein_coding	-1.59869	3.98132e-06	0.000352616
ASB14	protein_coding	-0.722282	4.06681e-06	0.000358175
KCNS2	protein_coding	-1.40348	4.14565e-06	0.00036309
GFRA3	protein_coding	1.51997	4.3477e-06	0.000378682
FOXP2	protein_coding	-1.36487	4.52768e-06	0.000392008
SCN3B	protein_coding	-1.01036	4.55043e-06	0.000392008
SLC28A1	protein_coding	1.26704	4.81343e-06	0.000410182
WFDC2	protein_coding	1.56368	4.88996e-06	0.000414463
KLHDC8A	protein_coding	1.16473	5.10016e-06	0.000429968
ZBTB7C	protein_coding	-1.14167	5.20561e-06	0.000436523
NUDT13	protein_coding	-0.695574	5.25544e-06	0.000438371
AMPH	protein_coding	-1.03475	5.41431e-06	0.000449245
NPTX2	protein_coding	-1.4038	5.50214e-06	0.000454143
KRT40	protein_coding	1.24001	6.2907e-06	0.000508188
VWC2L	protein_coding	-2.25749	6.3181e-06	0.000508188
EPB41L4A	protein_coding	-0.986265	6.36935e-06	0.00050971
LRRC17	protein_coding	-1.21679	6.75574e-06	0.0005379
ANGPTL1	protein_coding	-1.22531	6.85742e-06	0.000542611
HOXB5	protein_coding	-1.24651	6.88424e-06	0.000542611
SLC51B	protein_coding	1.14305	7.22897e-06	0.000562147
NDST3	protein_coding	-1.22054	7.34013e-06	0.000567241
SP5	protein_coding	-1.47062	7.59024e-06	0.000583708
PRH2	protein_coding	-1.25047	8.06628e-06	0.000614324
AWAT1	protein_coding	-2.35818	8.03033e-06	0.000614324
ZNF460	protein_coding	-0.872627	8.13148e-06	0.000616311
FOLH1	protein_coding	1.00696	8.26742e-06	0.000621373
SEZ6L	protein_coding	-1.29339	8.54973e-06	0.000635785
FRMD3	protein_coding	1.01903	8.86232e-06	0.000646826
BCL2A1	protein_coding	1.31369	8.85655e-06	0.000646826
RPL23	protein_coding	-0.726194	9.01227e-06	0.000651736
ASXL3	protein_coding	-1.58487	9.39292e-06	0.000676162
PCSK6	protein_coding	0.940428	9.69905e-06	0.000695025
KYNU	protein_coding	-1.14354	9.85271e-06	0.000702841
LGR4	protein_coding	-0.809	1.01294e-05	0.000716097
DOK6	protein_coding	-1.11271	1.02189e-05	0.0007192
SLC10A1	protein_coding	-1.26862	1.0603e-05	0.000739632
CPNE6	protein_coding	-1.59902	1.08062e-05	0.00075048
BMP5	protein_coding	-1.90919	1.09909e-05	0.000759962
SPATA21	protein_coding	-1.41121	1.1122e-05	0.00076567
CHADL	protein_coding	1.03921	1.1387e-05	0.000780504
CLCNKB	protein_coding	1.18901	1.1569e-05	0.000787779
CSAG2	protein_coding	2.15777	1.15931e-05	0.000787779
MYLK	protein_coding	0.985112	1.20178e-05	0.000813134
S100A7A	protein_coding	-2.47025	1.27287e-05	0.000853908
TAT	protein_coding	-1.14366	1.37595e-05	0.000906321
IGSF5	protein_coding	-1.11644	1.37975e-05	0.000906321
CCDC60	protein_coding	-2.2393	1.40515e-05	0.000915379
A2M	protein_coding	0.98825	1.40095e-05	0.000915379
CCDC65	protein_coding	-0.661001	1.48144e-05	0.000953261
PIPOX	protein_coding	-0.770343	1.53241e-05	0.000982052
XKR6	protein_coding	-1.04006	1.54979e-05	0.000987338
CPXM2	protein_coding	1.00013	1.56176e-05	0.000988799
SLC22A8	protein_coding	-2.12378	1.66157e-05	0.00103128
RAB38	protein_coding	-1.00582	1.65225e-05	0.00103128
FGFR2	protein_coding	1.07884	1.66061e-05	0.00103128
ABCA6	protein_coding	-0.986302	1.65422e-05	0.00103128
DPP6	protein_coding	-1.65658	1.69631e-05	0.00104872
EFNA5	protein_coding	-0.809838	1.71556e-05	0.00105648
PLA2G2C	protein_coding	-1.24548	1.74554e-05	0.00107018
HS3ST4	protein_coding	1.99832	1.76465e-05	0.00107018
VGLL1	protein_coding	1.38817	1.77208e-05	0.00107038
MASP2	protein_coding	-0.869943	1.84754e-05	0.00110747
PEG10	protein_coding	1.24501	1.95466e-05	0.00116724
ZNF117	protein_coding	-0.898534	1.9918e-05	0.00118186
SFTPB	protein_coding	-1.13352	1.99414e-05	0.00118186
LENEP	protein_coding	-1.01116	2.02653e-05	0.00118956
GRIK2	protein_coding	-1.22363	2.02101e-05	0.00118956
GTSF1	protein_coding	1.1417	2.02976e-05	0.00118956
MXRA8	protein_coding	-1.05862	2.11655e-05	0.00123583
KCNJ13	protein_coding	-1.50655	2.12923e-05	0.00123864
POMC	protein_coding	1.35133	2.18361e-05	0.00126097
TAS2R14	protein_coding	-0.778209	2.24725e-05	0.00129299
DIO1	protein_coding	-1.5205	2.34688e-05	0.00133569
FAM124A	protein_coding	-0.88096	2.34167e-05	0.00133569
TFF3	protein_coding	-1.586	2.33029e-05	0.00133569
TAS2R3	protein_coding	-1.58916	2.367e-05	0.0013423
SMPD3	protein_coding	-0.811504	2.43403e-05	0.00137536
BCAT1	protein_coding	-0.910432	2.52703e-05	0.00142281
GSG1	protein_coding	-1.15553	2.5761e-05	0.00144018
TMEFF2	protein_coding	-1.63303	2.63247e-05	0.00146345
SPATA1	protein_coding	-0.669819	2.63635e-05	0.00146345
SPTB	protein_coding	0.984301	2.69273e-05	0.0014895
KLHL14	protein_coding	-1.35887	2.70935e-05	0.00149207
EBF1	protein_coding	-0.808506	2.7163e-05	0.00149207
HYAL1	protein_coding	-1.06901	2.73381e-05	0.00149647
ADAM20	protein_coding	-1.13617	2.75365e-05	0.00150212
RGS22	protein_coding	-1.0184	2.77472e-05	0.00150839
SLIT2	protein_coding	-0.822123	2.83451e-05	0.0015356
MED1	protein_coding	-0.661174	2.87701e-05	0.00154799
CDSN	protein_coding	-1.72984	2.90658e-05	0.00155858
C19orf67	protein_coding	-1.07791	2.96063e-05	0.00158218
ANKDD1B	protein_coding	-0.883498	3.00311e-05	0.00159946
EYA4	protein_coding	1.5423	3.03304e-05	0.00160996
LAMC2	protein_coding	0.916766	3.08457e-05	0.00163182
PDC	protein_coding	-1.07515	3.10747e-05	0.00163844
IGSF10	protein_coding	-1.10473	3.11921e-05	0.00163914
TSPAN8	protein_coding	-1.63007	3.15465e-05	0.00165226
GYPE	protein_coding	-0.830049	3.19318e-05	0.00165594
ADCY8	protein_coding	2.16889	3.18502e-05	0.00165594
CKMT2	protein_coding	-1.02875	3.24638e-05	0.00166707
USH1C	protein_coding	1.40721	3.2419e-05	0.00166707
NUDT14	protein_coding	0.640952	3.33015e-05	0.00169902
ANO3	protein_coding	-1.26514	3.38904e-05	0.00172349
KLRC2	protein_coding	-1.44448	3.59652e-05	0.00181832
GLCCI1	protein_coding	-0.635691	3.59858e-05	0.00181832
SLCO1A2	protein_coding	-1.87375	3.62161e-05	0.00182411
RBM44	protein_coding	-0.801615	3.69615e-05	0.00185255
HES5	protein_coding	-1.08754	3.70963e-05	0.00185255
IL5	protein_coding	-1.39455	3.72878e-05	0.00185439
PRSS35	protein_coding	-1.31282	3.82968e-05	0.00189858
BNC2	protein_coding	-0.949559	3.8647e-05	0.00190993
LCA5L	protein_coding	-0.588567	3.88304e-05	0.001913
OAZ3	protein_coding	-0.718485	3.98285e-05	0.00195606
ACTC1	protein_coding	1.22761	4.04061e-05	0.00197827
TRH	protein_coding	-1.06795	4.07922e-05	0.00199099
NAV1	protein_coding	-0.687553	4.17491e-05	0.00202515
HOXB8	protein_coding	-1.26365	4.26062e-05	0.00205409
LRRCC1	protein_coding	-0.7277	4.27726e-05	0.00205582
GJB4	protein_coding	-1.41387	4.35913e-05	0.00208248
TRIM67	protein_coding	-1.14143	4.46469e-05	0.00212646
DSC1	protein_coding	-1.02354	4.49128e-05	0.00213268
UPK3B	protein_coding	1.38302	4.54074e-05	0.00214969
AQP4	protein_coding	-1.41265	4.6463e-05	0.00216413
MCC	protein_coding	-0.786222	4.62211e-05	0.00216413
ZNF423	protein_coding	-0.776759	4.6673e-05	0.00216413
HAPLN3	protein_coding	0.800189	4.6403e-05	0.00216413
LGALS7B	protein_coding	-1.71989	4.67463e-05	0.00216413
B3GALT5	protein_coding	-1.31527	4.70814e-05	0.00217029
VIL1	protein_coding	1.4731	4.85542e-05	0.00222235
WDR27	protein_coding	-0.623037	4.86337e-05	0.00222235
CLVS1	protein_coding	-0.877858	4.97424e-05	0.00226644
CHST3	protein_coding	0.627195	4.99571e-05	0.00226966
TYR	protein_coding	-2.08861	5.10492e-05	0.00231262
CD200R1	protein_coding	-0.810267	5.12165e-05	0.00231355
CPLX2	protein_coding	-1.82337	5.17388e-05	0.00233046
HECW2	protein_coding	-0.652509	5.21952e-05	0.00234432
EYA1	protein_coding	-1.38505	5.37547e-05	0.00238716
KRT79	protein_coding	-1.85625	5.37037e-05	0.00238716
LDHAL6B	protein_coding	-1.0344	5.42764e-05	0.00240356
SEMA6D	protein_coding	-0.969994	5.52506e-05	0.00243303
RGL4	protein_coding	-0.747566	5.55969e-05	0.00244146
GAPDHS	protein_coding	-1.34018	5.59228e-05	0.00244895
SLC38A8	protein_coding	1.46577	5.6436e-05	0.00246458
BSN	protein_coding	-0.785991	5.76144e-05	0.00250218
PDGFB	protein_coding	0.714324	5.7485e-05	0.00250218
MUC5AC	protein_coding	1.54876	5.79666e-05	0.00251056
CELA2B	protein_coding	-0.944617	5.94837e-05	0.00256921
STARD3	protein_coding	-0.608753	6.02652e-05	0.00258835
NOTCH2	protein_coding	-0.611191	6.04196e-05	0.00258835
LGALS14	protein_coding	-1.87781	6.11505e-05	0.00261257
STON2	protein_coding	-0.944434	6.18493e-05	0.00262818
VSX1	protein_coding	-1.35087	6.40092e-05	0.00269814
LRRC3B	protein_coding	-1.37451	6.39361e-05	0.00269814
TCN1	protein_coding	-1.79676	6.45484e-05	0.00271361
GLIPR1L1	protein_coding	-0.814816	6.51413e-05	0.00273126
WWP2	protein_coding	0.680412	6.63811e-05	0.00276121
REEP6	protein_coding	-1.16034	6.6717e-05	0.00276788
FOXA3	protein_coding	1.30841	6.99702e-05	0.00284326
ADAM29	protein_coding	-1.24256	6.91492e-05	0.00284326
CLEC2L	protein_coding	1.66369	6.99768e-05	0.00284326
OR52B6	protein_coding	-2.62359	6.98039e-05	0.00284326
TNNI2	protein_coding	1.16707	6.93368e-05	0.00284326
KCNH1	protein_coding	-1.02487	6.99148e-05	0.00284326
ANGPTL8	protein_coding	-1.05147	7.12641e-05	0.00286911
CDH2	protein_coding	-1.24074	7.16787e-05	0.00287536
VWA5B1	protein_coding	-1.23896	7.22822e-05	0.00289221
ANGPTL3	protein_coding	-1.01481	7.2489e-05	0.00289314
CENPW	protein_coding	0.727339	7.65499e-05	0.0030475
FAM186A	protein_coding	-0.875711	7.68185e-05	0.00305049
FRMD7	protein_coding	-1.31525	7.74447e-05	0.00306763
C9orf153	protein_coding	-0.988596	7.77598e-05	0.00307239
TNFSF9	protein_coding	-0.860992	7.83336e-05	0.00308088
IL1RAPL2	protein_coding	-1.47279	8.16538e-05	0.00315508
OTOGL	protein_coding	1.14437	8.1364e-05	0.00315508
WNK4	protein_coding	1.38619	8.16194e-05	0.00315508
SLC44A5	protein_coding	-1.37995	8.20521e-05	0.00316272
CLEC3A	protein_coding	-1.90011	8.23774e-05	0.00316751
RPA4	protein_coding	-1.00087	8.32068e-05	0.00319162
TMCO5A	protein_coding	-1.52813	8.36561e-05	0.00320106
TTN	protein_coding	-0.831484	8.4518e-05	0.00322459
PLA2G2F	protein_coding	-1.95196	8.49631e-05	0.00322757
DMBT1	protein_coding	-1.77998	8.56854e-05	0.00323979
QRICH2	protein_coding	0.782525	8.56958e-05	0.00323979
TEDDM1	protein_coding	-0.922055	8.62253e-05	0.00325202
TRPC5	protein_coding	-2.7133	9.0631e-05	0.00338578
COL6A6	protein_coding	-1.06462	9.09777e-05	0.00339069
OSBP2	protein_coding	0.615481	9.2194e-05	0.00341183
PRB1	protein_coding	-2.9383	9.21603e-05	0.00341183
SMPX	protein_coding	1.31097	9.18069e-05	0.00341183
MAB21L1	protein_coding	-1.03937	9.34314e-05	0.0034244
TK1	protein_coding	0.586733	9.35123e-05	0.0034244
SYT2	protein_coding	-0.851076	9.4083e-05	0.00343338
P2RY4	protein_coding	-1.00268	9.46096e-05	0.00343668
APOD	protein_coding	1.2989	9.48652e-05	0.00343805
TAS2R20	protein_coding	-0.73789	9.78297e-05	0.0035212
SHPRH	protein_coding	-0.698383	9.92007e-05	0.00356241
CACNA2D2	protein_coding	-0.710378	0.000100906	0.00361478
PRB2	protein_coding	-1.74482	0.000101118	0.00361478
TEX12	protein_coding	-0.821279	0.000101891	0.0036342
CTAG2	protein_coding	3.43024	0.000104502	0.0037022
PHEX	protein_coding	-0.985043	0.000107738	0.00379975
CHRM2	protein_coding	-2.31358	0.000108589	0.0038046
TAS2R43	protein_coding	-1.60249	0.0001086	0.0038046
FOXE3	protein_coding	1.27277	0.000109046	0.00381179
DNAH12	protein_coding	-0.865703	0.000111426	0.00386268
OMD	protein_coding	-1.04346	0.000112196	0.00386268
C1QTNF3	protein_coding	-0.935567	0.000112218	0.00386268
TAS2R42	protein_coding	-1.65279	0.000113751	0.00390693
HCRTR1	protein_coding	-0.877896	0.000116307	0.00398486
GBX2	protein_coding	-1.30825	0.000119254	0.00405181
MESP2	protein_coding	1.04632	0.000120339	0.00407987
ABCA4	protein_coding	-1.3256	0.000121736	0.00411432
CRCT1	protein_coding	-3.0515	0.000124304	0.00417837
LAMA2	protein_coding	-0.851363	0.000128028	0.00429439
DKK4	protein_coding	-1.39088	0.000128471	0.0043001
SLC18A2	protein_coding	-0.838902	0.000130555	0.00435138
ODF3L2	protein_coding	1.18065	0.000132218	0.0043975
KCNMB4	protein_coding	-0.823974	0.000132847	0.00440911
MVD	protein_coding	0.598525	0.000134376	0.00444116
CLDN6	protein_coding	1.66322	0.000137178	0.00450543
C1QL1	protein_coding	1.2302	0.000137155	0.00450543
GLRA1	protein_coding	-1.74863	0.00013877	0.00453883
LIF	protein_coding	1.05162	0.000139536	0.00455443
ITGA2B	protein_coding	0.816928	0.000140149	0.00455556
ONECUT3	protein_coding	-1.03829	0.000142154	0.00460175
KLHL30	protein_coding	1.23773	0.00014342	0.00461363
TCTEX1D4	protein_coding	-1.0244	0.000143536	0.00461363
PIWIL2	protein_coding	-0.933746	0.000143121	0.00461363
GPR143	protein_coding	0.986478	0.000143691	0.00461363
GRIK3	protein_coding	-1.14648	0.00014558	0.00462717
CACNB1	protein_coding	-0.64856	0.000145155	0.00462717
PAX7	protein_coding	-2.86188	0.000145038	0.00462717
ABCG2	protein_coding	-0.724064	0.000146668	0.00465235
FOXC2	protein_coding	1.19607	0.000148383	0.00469732
SCN9A	protein_coding	-0.821524	0.000149158	0.00471236
NMUR1	protein_coding	0.8283	0.000150072	0.00473176
LONRF3	protein_coding	-0.815729	0.000150735	0.00473612
TPH2	protein_coding	-1.33425	0.000150811	0.00473612
SLCO1B1	protein_coding	-2.09033	0.000152247	0.00475281
RASGEF1C	protein_coding	1.12588	0.000151735	0.00475281
ZNF516	protein_coding	-0.736442	0.000151951	0.00475281
TP53AIP1	protein_coding	-1.05792	0.000153077	0.00475988
CEACAM8	protein_coding	-1.45367	0.000157438	0.00488585
TMPRSS11F	protein_coding	-1.50911	0.000159172	0.00492995
CRYBB2	protein_coding	0.901903	0.000163283	0.0050375
TMC5	protein_coding	-1.3615	0.000166226	0.00508883
SLC9A2	protein_coding	-1.08482	0.000166238	0.00508883
FAM71C	protein_coding	-2.22365	0.000167891	0.00512506
RAB26	protein_coding	-0.892194	0.000168072	0.00512506
PNLIPRP3	protein_coding	-2.78195	0.000171036	0.00519533
ACTBL2	protein_coding	1.18043	0.000172894	0.00523811
AFF2	protein_coding	-1.1049	0.000173413	0.00523811
UPP2	protein_coding	-0.97287	0.000180364	0.00540578
CAND2	protein_coding	0.800155	0.000181728	0.00543631
C4orf45	protein_coding	-1.14043	0.000183233	0.00547096
SLC30A10	protein_coding	-1.12129	0.000186777	0.00555482
OXGR1	protein_coding	1.11453	0.000187099	0.00555482
BDNF	protein_coding	-1.06628	0.000187983	0.00556013
PRDM6	protein_coding	-0.758503	0.000190336	0.00561919
TRPV4	protein_coding	0.878358	0.000197387	0.00581538
DCBLD1	protein_coding	-0.601875	0.000197719	0.00581538
TBR1	protein_coding	1.39053	0.000198915	0.00583967
DSCR8	protein_coding	2.67914	0.000201904	0.00591639
GPR20	protein_coding	-0.820454	0.000203783	0.00595328
PTGDR	protein_coding	-0.781083	0.000204748	0.00596645
OSR2	protein_coding	-0.894072	0.000206148	0.00598514
NDRG2	protein_coding	0.828121	0.000207084	0.00599025
APOBEC4	protein_coding	-2.09665	0.000206876	0.00599025
WFDC12	protein_coding	-1.48669	0.000208041	0.00600691
CBLN2	protein_coding	-1.02749	0.000214245	0.00614103
CA13	protein_coding	-0.760645	0.000215594	0.00615731
DMRT1	protein_coding	1.2972	0.000215258	0.00615731
GABRB2	protein_coding	-1.1222	0.000218727	0.00621302
SGIP1	protein_coding	-0.813143	0.000222675	0.00629118
KCNK10	protein_coding	-0.971557	0.000224449	0.00632995
SPINK13	protein_coding	-1.44032	0.000226266	0.00636979
TRPC6	protein_coding	-0.626163	0.000227814	0.00639054
C2CD4A	protein_coding	-1.26873	0.000229188	0.00641766
NACAD	protein_coding	0.844979	0.000229656	0.00641938
MS4A4E	protein_coding	-0.845992	0.000234517	0.00653209
CST6	protein_coding	-1.12138	0.000237804	0.00659077
HTR2B	protein_coding	-0.851091	0.000237878	0.00659077
CARD17	protein_coding	-1.11817	0.000251383	0.00691735
DAZL	protein_coding	-1.16856	0.000252807	0.00694339
NT5DC4	protein_coding	0.866849	0.000253997	0.00696393
ZNF536	protein_coding	-1.30583	0.000255728	0.00699922
HELT	protein_coding	-1.77863	0.000257637	0.00703925
TRIB2	protein_coding	-0.673015	0.000261491	0.00713219
UNC5D	protein_coding	-1.90734	0.000262682	0.00715229
KCNA2	protein_coding	-1.0854	0.000265236	0.00719699
GBGT1	protein_coding	-0.592807	0.000267192	0.0072376
OR2AE1	protein_coding	-1.39498	0.000267775	0.00724095
FABP12	protein_coding	-2.38049	0.000268247	0.00724128
RDM1	protein_coding	0.613601	0.000269149	0.00724996
TGM5	protein_coding	-1.14267	0.000274409	0.00733231
MEIS2	protein_coding	-0.846909	0.00027726	0.00735859
ESR2	protein_coding	-0.682047	0.000276454	0.00735859
FZD9	protein_coding	0.993766	0.000276916	0.00735859
GLT1D1	protein_coding	-0.818606	0.000280755	0.00743199
ZEB2	protein_coding	-0.629738	0.000280969	0.00743199
PGPEP1L	protein_coding	1.2229	0.000282281	0.00744363
RASL11A	protein_coding	-0.761995	0.000284834	0.0074965
LIMS2	protein_coding	0.671801	0.000286196	0.0075198
ABCG4	protein_coding	-0.672086	0.000288565	0.00756943
ARL4A	protein_coding	-0.602701	0.000289445	0.0075799
SH2D4B	protein_coding	-0.764437	0.000290407	0.00759248
UGT2B11	protein_coding	-2.02548	0.000292348	0.00761797
ARR3	protein_coding	-0.675428	0.000292127	0.00761797
LIPG	protein_coding	-0.890546	0.000293066	0.00762406
STARD9	protein_coding	-0.608266	0.000295929	0.00768588
TMC1	protein_coding	-0.895168	0.000299521	0.0077536
CCL28	protein_coding	-1.21373	0.000303396	0.00782821
CYB5A	protein_coding	-0.608259	0.000305543	0.00785789
HTR1F	protein_coding	-0.805402	0.0003078	0.00789297
TMTC1	protein_coding	-0.919697	0.000308831	0.00789297
ATP1A4	protein_coding	-0.798911	0.00030891	0.00789297
GPR182	protein_coding	-0.852895	0.000311184	0.00793822
CDRT4	protein_coding	-0.732403	0.000317658	0.00809026
SHISA7	protein_coding	-0.88311	0.000319415	0.00810982
ONECUT2	protein_coding	-1.04505	0.000324878	0.00823426
ZBTB32	protein_coding	-0.705198	0.000332099	0.00836349
MYL9	protein_coding	0.724925	0.000333005	0.00837293
KCNT1	protein_coding	1.00719	0.00033725	0.00846528
CXADR	protein_coding	-0.648085	0.000340693	0.00852543
ENO4	protein_coding	-0.591386	0.000344602	0.00860959
TSPYL6	protein_coding	-1.50689	0.000352211	0.00875804
KCNRG	protein_coding	-0.732737	0.000362646	0.00897507
NXPH2	protein_coding	-1.31911	0.000365483	0.00898797
CYP4F22	protein_coding	-1.04332	0.000365929	0.00898797
HPX	protein_coding	-0.66138	0.000366018	0.00898797
TMEM213	protein_coding	1.41097	0.000373528	0.00914391
TAS2R60	protein_coding	-1.69297	0.000377935	0.00920888
LOXHD1	protein_coding	-0.689857	0.000380814	0.00923669
ZNF573	protein_coding	-0.664991	0.000381714	0.00923669
XDH	protein_coding	-1.27609	0.000383847	0.00926013
MEP1B	protein_coding	-1.05247	0.000385422	0.00927441
HES2	protein_coding	-1.18878	0.000385919	0.00927441
DMC1	protein_coding	0.753327	0.000388637	0.00932552
FNDC4	protein_coding	0.644176	0.00039131	0.0093705
GCNT3	protein_coding	-1.17279	0.000393345	0.0093705
SLC26A5	protein_coding	-0.902554	0.000393484	0.0093705
NOS1	protein_coding	1.08087	0.000399452	0.00948398
GRIA2	protein_coding	1.33498	0.000406246	0.00961631
TSSK4	protein_coding	-0.665119	0.00040932	0.00967456
SLC15A1	protein_coding	1.29415	0.000414493	0.00978215
RGS7BP	protein_coding	1.21043	0.000416865	0.00982344
VCAN	protein_coding	-0.706248	0.000417636	0.0098269
LRRC4	protein_coding	-0.709524	0.000420323	0.00986593
METTL21C	protein_coding	-1.54348	0.000423998	0.0099174
LIN28A	protein_coding	-1.25623	0.000430633	0.0100008
FFAR4	protein_coding	-0.707811	0.000430736	0.0100008
OR52H1	protein_coding	-2.39221	0.000429596	0.0100008
TTC28	protein_coding	-0.654387	0.000430241	0.0100008
MYH2	protein_coding	-1.13419	0.000428988	0.0100008
C8orf74	protein_coding	-1.87893	0.000431717	0.0100087
ZNF671	protein_coding	-0.63645	0.000432344	0.0100087
STEAP2	protein_coding	-0.730364	0.000436483	0.0100897
TRPM3	protein_coding	-0.763865	0.000440027	0.0101567
TMC3	protein_coding	-0.748844	0.000442301	0.0101794
TRIL	protein_coding	-0.731716	0.000446442	0.0102545
LFNG	protein_coding	-0.585381	0.000451272	0.0103405
APBA1	protein_coding	0.781194	0.000452127	0.0103451
SPINK7	protein_coding	-1.94195	0.00045289	0.0103476
RDH12	protein_coding	-0.707983	0.000459484	0.0104679
TFF2	protein_coding	1.99287	0.000463224	0.0105226
TRPM6	protein_coding	0.926527	0.000463946	0.0105239
DRD2	protein_coding	1.08883	0.000465502	0.0105297
ENTPD8	protein_coding	1.12592	0.000470254	0.0106211
NEB	protein_coding	-0.750963	0.000480996	0.0107865
COL9A1	protein_coding	1.64837	0.000482697	0.0108093
PDE6C	protein_coding	-0.620025	0.000484266	0.010829
BHLHE41	protein_coding	-0.716821	0.000489871	0.0109356
CHN2	protein_coding	-0.751866	0.000490426	0.0109356
QRFPR	protein_coding	1.52214	0.000491114	0.0109356
DTHD1	protein_coding	-0.970777	0.000495682	0.0110218
RETN	protein_coding	1.05264	0.00049838	0.0110661
TEX101	protein_coding	-1.36188	0.000505764	0.0111986
SNCG	protein_coding	-1.1016	0.000505424	0.0111986
OR7D2	protein_coding	-1.15002	0.000507192	0.0112144
GRM5	protein_coding	-1.28991	0.000508555	0.0112288
PRSS37	protein_coding	-1.2042	0.000512537	0.0112851
PCDH7	protein_coding	-0.795542	0.000518285	0.0113095
RYR1	protein_coding	0.878548	0.000517519	0.0113095
CACNA1S	protein_coding	-1.01601	0.000518745	0.0113095
TMEM196	protein_coding	-2.21446	0.000516305	0.0113095
MIA	protein_coding	1.12998	0.000515553	0.0113095
HHIP	protein_coding	-1.00183	0.000519382	0.0113095
FGL1	protein_coding	-1.34001	0.000527033	0.0114137
OR9A2	protein_coding	-2.30986	0.000526204	0.0114137
PGA5	protein_coding	-1.75739	0.000528793	0.0114354
KCNB2	protein_coding	-1.33326	0.00053361	0.0115238
PAPOLB	protein_coding	-1.6251	0.000535571	0.0115503
CWH43	protein_coding	-1.36499	0.000538041	0.0115719
CYP11A1	protein_coding	0.93226	0.000539161	0.0115802
SLC2A9	protein_coding	-0.613141	0.000545456	0.0116677
TMPRSS11E	protein_coding	-1.31986	0.000544315	0.0116677
TG	protein_coding	-0.751696	0.00054636	0.0116712
SGCA	protein_coding	0.916473	0.000550747	0.0117331
FXYD4	protein_coding	1.30837	0.000550368	0.0117331
ATCAY	protein_coding	-1.08161	0.00055326	0.0117549
ZDHHC19	protein_coding	0.931003	0.000557202	0.0118227
FOXI2	protein_coding	1.02569	0.000558728	0.0118392
ADAMTS6	protein_coding	-0.610523	0.000570431	0.0119586
TNNT3	protein_coding	-1.02402	0.000567744	0.0119586
LEFTY1	protein_coding	-0.87161	0.00057038	0.0119586
VCX3A	protein_coding	2.99906	0.000572653	0.0119733
WT1	protein_coding	-0.981193	0.000572214	0.0119733
EGR2	protein_coding	-0.722321	0.000581987	0.0121284
OR2B6	protein_coding	0.812775	0.000589663	0.0122156
C6orf201	protein_coding	-0.772135	0.000592616	0.0122606
RDH8	protein_coding	-1.08306	0.000598682	0.0123537
PROKR1	protein_coding	-1.0628	0.00059801	0.0123537
TMEM100	protein_coding	1.17581	0.000602049	0.0123746
LGI1	protein_coding	-1.61435	0.000601387	0.0123746
GRIA1	protein_coding	-1.32732	0.000605391	0.0124271
ATP8A1	protein_coding	-0.603269	0.000610307	0.0124954
ACOXL	protein_coding	-0.761184	0.000613907	0.0125366
GDAP1L1	protein_coding	-1.07982	0.000616121	0.0125493
SHCBP1L	protein_coding	1.3164	0.000624028	0.012645
CNN1	protein_coding	0.867523	0.000627565	0.0126996
MEP1A	protein_coding	-0.872712	0.000649957	0.013053
SLC25A2	protein_coding	-1.06	0.000670392	0.0133612
TTYH1	protein_coding	1.16906	0.000682263	0.0135464
IGFL4	protein_coding	-0.817159	0.000681882	0.0135464
DNASE1L3	protein_coding	-0.897875	0.000686925	0.0136047
DSG1	protein_coding	-1.61104	0.000691763	0.0136834
NRXN1	protein_coding	-1.09072	0.000693694	0.0137044
SNX31	protein_coding	-0.773921	0.000699007	0.0137921
CARD18	protein_coding	-2.92356	0.000700009	0.0137946
NHSL2	protein_coding	-0.808246	0.000708122	0.0139196
GAS2	protein_coding	-0.954005	0.000710819	0.0139379
OTP	protein_coding	-1.14914	0.000712805	0.0139595
ZNF483	protein_coding	-0.754135	0.000717712	0.0140179
TDO2	protein_coding	-0.876228	0.000718459	0.0140179
SOST	protein_coding	-1.14079	0.000735773	0.0142684
RTL1	protein_coding	-1.95926	0.000734352	0.0142684
HIPK4	protein_coding	-0.669074	0.000735819	0.0142684
GRIN3A	protein_coding	-0.631754	0.00074426	0.0143966
AGTR2	protein_coding	-1.8799	0.000754498	0.0145057
FANK1	protein_coding	-0.596572	0.00076736	0.0146636
PRSS48	protein_coding	-1.84999	0.0007852	0.0149321
GRM8	protein_coding	-0.731063	0.000788535	0.0149451
SPIN2A	protein_coding	-0.73369	0.000788729	0.0149451
CHRM4	protein_coding	0.719835	0.000791236	0.0149746
XAGE3	protein_coding	2.07512	0.000798536	0.0150946
NRXN2	protein_coding	-0.762172	0.000801167	0.0151262
PGLYRP1	protein_coding	-0.942215	0.0008174	0.0154142
AGT	protein_coding	-1.19081	0.000820795	0.0154598
SLITRK5	protein_coding	-1.18291	0.000827638	0.0155326
HTR7	protein_coding	-0.710317	0.000829585	0.0155326
STRA8	protein_coding	1.25049	0.000847515	0.0157932
CYP4A11	protein_coding	-1.28645	0.000856461	0.0159123
LMO1	protein_coding	1.2369	0.00085693	0.0159123
GUCY2C	protein_coding	-0.59341	0.000860924	0.0159676
GABBR2	protein_coding	1.15434	0.000864459	0.0160143
CACNA1G	protein_coding	-0.847933	0.000882466	0.0162524
SULT1C2	protein_coding	-0.811018	0.000887523	0.0163265
CITED4	protein_coding	0.69721	0.000889992	0.0163338
RGN	protein_coding	0.821536	0.000902375	0.016518
NFATC1	protein_coding	0.590161	0.000912901	0.0166573
IL26	protein_coding	-1.19144	0.000914103	0.0166599
PCDH18	protein_coding	-0.763893	0.00091614	0.0166778
TMPRSS5	protein_coding	1.00859	0.000940112	0.0170747
ACCSL	protein_coding	-1.68865	0.000948562	0.0171886
C20orf141	protein_coding	-1.14176	0.000951783	0.0172272
PTPRO	protein_coding	-0.593423	0.000953957	0.0172467
DNAH6	protein_coding	-0.678135	0.000963419	0.0173779
IDO1	protein_coding	1.08843	0.000966523	0.017414
DPYSL4	protein_coding	-0.956831	0.00097534	0.0174835
KIRREL2	protein_coding	1.05769	0.000974908	0.0174835
CCNI2	protein_coding	0.969225	0.000975352	0.0174835
MLANA	protein_coding	-0.598695	0.000977035	0.0174835
ST6GALNAC2	protein_coding	0.715046	0.000983552	0.0175602
HAO2	protein_coding	-0.908694	0.000986758	0.0175685
PCDHB11	protein_coding	-0.976025	0.000987356	0.0175685
CLCA4	protein_coding	-1.10313	0.000985164	0.0175685
DAB1	protein_coding	-0.845457	0.000999182	0.0176593
ZNF560	protein_coding	1.57552	0.00100517	0.0177025
MYH7	protein_coding	1.24648	0.00100612	0.0177025
AIFM3	protein_coding	0.619331	0.00102869	0.0180192
FAM25A	protein_coding	-2.03294	0.00104189	0.0182099
ITGA6	protein_coding	0.694984	0.00104686	0.018218
XKR3	protein_coding	1.26736	0.00104697	0.018218
RLBP1	protein_coding	1.32917	0.00104543	0.018218
SYNPO2L	protein_coding	-0.694732	0.00104863	0.0182268
ADAM32	protein_coding	-0.751777	0.00105379	0.0182762
CDH20	protein_coding	-0.827577	0.00105529	0.018282
TAS2R13	protein_coding	-1.3558	0.00105981	0.0183001
ROBO2	protein_coding	-1.11478	0.00106316	0.0183333
PLP1	protein_coding	-1.3394	0.00106545	0.0183371
MLN	protein_coding	-1.12455	0.00107219	0.018433
WNT5B	protein_coding	-0.805808	0.00107975	0.0184646
FSTL4	protein_coding	1.06261	0.00107988	0.0184646
TLL1	protein_coding	-0.88504	0.00109423	0.0186896
VSTM2L	protein_coding	-0.899132	0.00109917	0.0187132
CYP2A7	protein_coding	-1.47494	0.00109855	0.0187132
IRGM	protein_coding	-0.802211	0.00110969	0.0188312
IGF1R	protein_coding	0.728325	0.00110906	0.0188312
SLC38A11	protein_coding	-0.940081	0.00111525	0.0188849
LRRC14B	protein_coding	1.19243	0.00111854	0.0189204
TMEM158	protein_coding	0.794353	0.00112033	0.0189304
RUNX1T1	protein_coding	-0.662372	0.00112702	0.0190026
EXD1	protein_coding	-0.676985	0.00113207	0.0190406
NMNAT2	protein_coding	-0.896117	0.00113906	0.0190832
GPR34	protein_coding	-0.662058	0.00114376	0.019101
CROCC2	protein_coding	-0.907387	0.00114285	0.019101
CPB2	protein_coding	-0.869703	0.00115024	0.019189
COL8A1	protein_coding	0.734451	0.0011552	0.0192178
IPCEF1	protein_coding	-0.668736	0.00115564	0.0192178
IFITM10	protein_coding	-0.673545	0.00117495	0.0194366
MYBPH	protein_coding	0.820018	0.00118254	0.0195212
SDR9C7	protein_coding	-1.08791	0.00119898	0.0197719
CCL22	protein_coding	-0.761155	0.00120287	0.0197895
TEX14	protein_coding	0.783773	0.00120381	0.0197895
LY6G6C	protein_coding	-1.07345	0.00120773	0.0198054
SLC39A12	protein_coding	1.05939	0.00120981	0.0198054
PPP3R2	protein_coding	-1.3035	0.00121307	0.0198177
CYTL1	protein_coding	-0.737035	0.00121491	0.0198272
DDX53	protein_coding	-2.94377	0.00121623	0.0198282
LTK	protein_coding	0.848687	0.00122116	0.019888
DOK5	protein_coding	0.766343	0.00123211	0.0200012
TMEM190	protein_coding	-0.686355	0.00123572	0.0200012
TPM2	protein_coding	0.699175	0.00124702	0.0201287
KLK14	protein_coding	1.1548	0.00124743	0.0201287
SRL	protein_coding	-0.660268	0.00125204	0.0201458
LGSN	protein_coding	1.56959	0.00125232	0.0201458
WNT5A	protein_coding	-0.670184	0.00127103	0.020302
HMX1	protein_coding	-1.29226	0.00127839	0.0203781
RTN4R	protein_coding	0.61247	0.00127971	0.0203784
POMK	protein_coding	-0.704121	0.00130252	0.0205903
RAB40AL	protein_coding	-0.897067	0.00130347	0.0205903
WNT9A	protein_coding	0.732875	0.00130222	0.0205903
DEFB134	protein_coding	-1.82668	0.00131621	0.0207293
NRTN	protein_coding	0.781853	0.0013445	0.0211116
CDH4	protein_coding	-1.01961	0.0013568	0.0212623
ACOT6	protein_coding	-1.18043	0.00137065	0.0214369
ACSBG1	protein_coding	-0.818649	0.00138773	0.02164
NPPC	protein_coding	0.875189	0.00138776	0.02164
PRRX1	protein_coding	-0.60465	0.0013987	0.0217247
CHRM5	protein_coding	-0.704794	0.00140569	0.0217941
ALDH8A1	protein_coding	0.694822	0.00141651	0.021872
ZFHX4	protein_coding	-0.802023	0.00141919	0.0218919
P2RY2	protein_coding	-0.800189	0.00143422	0.0220647
NEUROD2	protein_coding	-0.965787	0.00145037	0.022264
KCNJ1	protein_coding	-0.628467	0.00145639	0.0223129
KCNMB2	protein_coding	-0.994278	0.00147532	0.0224937
GAS2L2	protein_coding	-1.13112	0.0014787	0.0225234
CDKL2	protein_coding	1.16771	0.00148489	0.0225959
CNDP1	protein_coding	-0.757086	0.00152657	0.023141
LAMA3	protein_coding	0.819413	0.00152659	0.023141
STAC2	protein_coding	-1.1947	0.00153387	0.0231454
UGT8	protein_coding	0.812586	0.00153422	0.0231454
SV2B	protein_coding	-0.940928	0.00153381	0.0231454
BTBD11	protein_coding	-0.751883	0.00153256	0.0231454
GNMT	protein_coding	-0.599035	0.00152973	0.0231454
RNF175	protein_coding	-0.643308	0.0015394	0.0232014
NCAM2	protein_coding	-0.711977	0.00155116	0.0233118
RGS20	protein_coding	-0.887016	0.00155267	0.0233122
LRRC9	protein_coding	-1.04917	0.00155607	0.0233411
XKRX	protein_coding	-0.684884	0.00156824	0.0234345
SLC26A4	protein_coding	0.997033	0.00156489	0.0234345
DIO3	protein_coding	-1.02954	0.00156747	0.0234345
TMOD1	protein_coding	0.823646	0.00158072	0.0234431
CAV3	protein_coding	-1.14631	0.0015789	0.0234431
GRM4	protein_coding	-0.874344	0.00157735	0.0234431
IYD	protein_coding	-1.06804	0.00157224	0.0234431
IZUMO2	protein_coding	1.77449	0.00161671	0.0238357
EFCAB1	protein_coding	-0.943225	0.00162457	0.0239134
CDRT1	protein_coding	-0.719361	0.00163175	0.0239967
GIMAP5	protein_coding	-0.727957	0.0016437	0.02415
EPHX4	protein_coding	0.764077	0.00165747	0.0242169
CDKN2B	protein_coding	-0.744118	0.00166638	0.0242796
SCN2A	protein_coding	1.00327	0.0016877	0.0245222
NRG1	protein_coding	-0.884031	0.00170244	0.0246909
FTHL17	protein_coding	2.69374	0.00172335	0.0249483
HBG2	protein_coding	-0.741825	0.0017508	0.0252297
FXYD1	protein_coding	0.706154	0.0017616	0.0252699
APLN	protein_coding	0.680526	0.0017595	0.0252699
EFR3B	protein_coding	0.959498	0.00177092	0.0253574
NOXA1	protein_coding	0.650003	0.00177773	0.0254088
OTX1	protein_coding	0.670314	0.00178607	0.0254569
PPP4R4	protein_coding	1.10217	0.00178755	0.0254569
CCL20	protein_coding	0.977845	0.00179721	0.0255483
COL11A2	protein_coding	1.02371	0.00182502	0.0258272
SLC8A1	protein_coding	-0.593063	0.00182368	0.0258272
KLB	protein_coding	-0.591977	0.0018244	0.0258272
NRGN	protein_coding	-0.598542	0.00183149	0.0258723
PKD1L3	protein_coding	-0.641588	0.00185357	0.0261608
OR2D2	protein_coding	-2.87946	0.00186904	0.0263084
CAMKV	protein_coding	-1.11867	0.00187317	0.0263195
POU6F2	protein_coding	1.46818	0.00188122	0.0263445
CPA5	protein_coding	-0.785552	0.00188137	0.0263445
HMCN1	protein_coding	-0.784749	0.00187816	0.0263445
FCRL6	protein_coding	-0.652888	0.0018833	0.0263445
TET1	protein_coding	-0.670408	0.00188191	0.0263445
RYR3	protein_coding	0.750932	0.00188995	0.0264141
MMP25	protein_coding	0.703929	0.00191485	0.0267147
ALDOB	protein_coding	-0.721795	0.00192338	0.0267155
HAP1	protein_coding	-0.955332	0.0019227	0.0267155
KRT13	protein_coding	1.34695	0.00193351	0.0267619
GATA5	protein_coding	1.5059	0.00193337	0.0267619
PAGE2B	protein_coding	1.27793	0.00193731	0.0267675
WFDC5	protein_coding	-1.32473	0.00193601	0.0267675
CACNA2D3	protein_coding	-0.73629	0.00194348	0.0268292
HSD17B13	protein_coding	-0.743232	0.00194787	0.0268663
KCNH3	protein_coding	-0.724598	0.00195207	0.0269007
KLK3	protein_coding	-1.4776	0.00197923	0.0272037
FOXL1	protein_coding	0.714492	0.00198645	0.0272553
RFX8	protein_coding	-0.607811	0.00200091	0.0274226
MT1H	protein_coding	0.888171	0.00200504	0.0274388
TUBAL3	protein_coding	0.864157	0.00200917	0.0274504
NPR2	protein_coding	0.627536	0.00201548	0.02751
SUMO4	protein_coding	-0.672156	0.0020551	0.0279299
OBP2A	protein_coding	-0.988707	0.0020693	0.0280262
CD1B	protein_coding	-1.02562	0.00207382	0.0280633
SLC17A9	protein_coding	0.712405	0.00207928	0.0281131
OR9A4	protein_coding	-1.46158	0.00208452	0.0281357
HKDC1	protein_coding	-0.925134	0.00208429	0.0281357
SLC13A4	protein_coding	-0.646189	0.0020923	0.0282157
B4GALNT2	protein_coding	-1.2404	0.00209962	0.0282427
TAS2R5	protein_coding	-0.640585	0.00210439	0.0282828
C1QL3	protein_coding	-0.749207	0.00211954	0.0284133
OR52D1	protein_coding	-2.0257	0.00212697	0.0284193
CCL24	protein_coding	-0.91124	0.00213926	0.0285447
RELN	protein_coding	-0.909495	0.00214017	0.0285447
SPACA4	protein_coding	-0.787019	0.00214368	0.0285673
LRRN4	protein_coding	0.943123	0.00217339	0.0288414
SLC25A41	protein_coding	0.742144	0.00218006	0.0288894
CEACAM16	protein_coding	-1.3291	0.00218958	0.028983
PRR18	protein_coding	0.959111	0.00221294	0.0292431
SLC5A5	protein_coding	-0.755708	0.00225997	0.0296032
HOXA11	protein_coding	-1.07986	0.00225991	0.0296032
SERPINA12	protein_coding	1.03266	0.00227503	0.0297395
SERP2	protein_coding	0.604138	0.0023165	0.0302314
NCAM1	protein_coding	0.942119	0.00233304	0.0303469
SLC10A6	protein_coding	-0.696154	0.00233934	0.0304037
FTCD	protein_coding	0.838413	0.00234592	0.0304641
TNNC1	protein_coding	0.954618	0.00235051	0.0304985
KCND3	protein_coding	-0.803829	0.00235409	0.03052
TMEM45A	protein_coding	-0.742687	0.00236364	0.0306186
OIT3	protein_coding	0.701473	0.00237404	0.0307281
ENAM	protein_coding	-0.790036	0.00239589	0.0309346
ARL14	protein_coding	-1.15912	0.00240419	0.0309911
PTPRD	protein_coding	-0.769378	0.0024554	0.031548
C6	protein_coding	1.34686	0.00246427	0.031594
HRNR	protein_coding	-0.73084	0.00248198	0.0317753
C19orf33	protein_coding	1.12344	0.00250404	0.0319128
KLRK1	protein_coding	-0.757357	0.00252303	0.0320103
CTNND2	protein_coding	1.03045	0.00252077	0.0320103
IL6	protein_coding	0.774102	0.00255146	0.0322823
ASPDH	protein_coding	-0.641907	0.00256949	0.0324584
KCNC1	protein_coding	-0.845984	0.00257329	0.0324803
TGFB2	protein_coding	-0.800797	0.00259484	0.0326738
TUBA3C	protein_coding	-1.68199	0.00259907	0.0327007
RRAD	protein_coding	-0.841264	0.00260112	0.0327007
FMO3	protein_coding	0.977637	0.00260556	0.0327305
PLCL1	protein_coding	-0.615532	0.00261325	0.0328009
DSG4	protein_coding	-1.24758	0.00261964	0.0328549
SRPX2	protein_coding	-0.599924	0.00262337	0.0328755
LIPF	protein_coding	1.92097	0.00262988	0.032931
OR2AG2	protein_coding	-1.37303	0.00263661	0.0329629
PCP2	protein_coding	0.68653	0.00264141	0.0329966
SLC13A5	protein_coding	0.902616	0.00265454	0.0331082
ZDHHC22	protein_coding	-1.08813	0.0026925	0.0335287
SLC4A4	protein_coding	-0.780958	0.00269936	0.0335875
GJB2	protein_coding	-0.886424	0.00274359	0.0340262
RPH3A	protein_coding	-0.643766	0.00275116	0.0340439
FTMT	protein_coding	1.18162	0.00281998	0.034732
MT1A	protein_coding	0.901116	0.00286496	0.0351761
MKRN2OS	protein_coding	-0.626292	0.00286839	0.0351909
SFTPA2	protein_coding	-0.97234	0.00287115	0.0351973
LRRC4C	protein_coding	-0.881918	0.00288118	0.0352928
SLC16A8	protein_coding	0.710986	0.00293022	0.0356922
C17orf78	protein_coding	-0.690028	0.00292654	0.0356922
TREML1	protein_coding	-0.585324	0.00293192	0.0356922
BLID	protein_coding	-2.49866	0.00293416	0.0356922
RHCG	protein_coding	-1.00153	0.0029653	0.0359323
SFTPD	protein_coding	0.834181	0.00297038	0.0359663
B3GNT7	protein_coding	0.714965	0.00297797	0.0360206
B3GNT8	protein_coding	-0.589293	0.00298472	0.0360292
EFCAB6	protein_coding	-0.600228	0.0029921	0.0360907
GRB14	protein_coding	0.736289	0.00306439	0.0368559
ENPP2	protein_coding	-0.72879	0.00309241	0.037109
IL1A	protein_coding	-0.869974	0.0031015	0.0371544
A4GALT	protein_coding	0.591591	0.00311386	0.0372742
RANBP3L	protein_coding	-0.816319	0.00318883	0.0379387
SOHLH1	protein_coding	1.34514	0.00319104	0.0379387
FBXO2	protein_coding	0.85529	0.00319701	0.037981
TCP11	protein_coding	1.08486	0.0032286	0.0382986
THEG	protein_coding	-1.08657	0.00324155	0.0383945
TSHR	protein_coding	-0.835759	0.00324129	0.0383945
TBX20	protein_coding	-1.19554	0.00326235	0.0386118
RAD21L1	protein_coding	-1.00309	0.00328935	0.0386989
GPR141	protein_coding	-0.681859	0.00329201	0.0387014
MCOLN3	protein_coding	0.690209	0.0033115	0.038731
FRG2C	protein_coding	-0.843681	0.00331173	0.038731
OTOR	protein_coding	-1.51202	0.003308	0.038731
NEK10	protein_coding	-0.612739	0.00334266	0.0389771
SPINK5	protein_coding	-1.21249	0.00335452	0.0390288
ATP6V1C2	protein_coding	0.669053	0.00338077	0.0390908
HGFAC	protein_coding	-0.786365	0.00337986	0.0390908
FOSL1	protein_coding	0.758813	0.00337666	0.0390908
KRT71	protein_coding	-1.22158	0.0033884	0.0391341
THSD7B	protein_coding	-0.819888	0.00339148	0.039141
TPSAB1	protein_coding	0.761546	0.00340397	0.0392462
CYP2A13	protein_coding	-1.62185	0.00341883	0.039315
DGKB	protein_coding	-0.91085	0.00342633	0.0393703
TSPAN16	protein_coding	-0.789034	0.00342897	0.039372
MYO18B	protein_coding	1.14569	0.00346387	0.0395997
MT1G	protein_coding	0.760767	0.00346774	0.0396109
ABCC2	protein_coding	-0.724175	0.00347114	0.0396109
CSF3	protein_coding	1.09232	0.00351664	0.0400576
ANKRD1	protein_coding	1.09135	0.00352467	0.0401201
SERPINB3	protein_coding	-1.46769	0.00357365	0.0405606
SLITRK4	protein_coding	-0.802226	0.00357745	0.0405744
INSL4	protein_coding	-1.48885	0.00362768	0.0409087
C11orf52	protein_coding	0.706443	0.00365756	0.0411868
PRPH2	protein_coding	-0.693113	0.00365639	0.0411868
PRB4	protein_coding	-1.86401	0.0036727	0.0412982
CA6	protein_coding	1.23392	0.00369488	0.0414
CD226	protein_coding	-0.586055	0.00372845	0.0416283
SPRR1A	protein_coding	-1.3861	0.00372693	0.0416283
STMN3	protein_coding	-0.585163	0.00377571	0.0420962
SUN3	protein_coding	0.850975	0.00378251	0.0421072
ZNF157	protein_coding	0.63812	0.00378308	0.0421072
TRIM71	protein_coding	-0.904305	0.00382368	0.042421
CTNNA2	protein_coding	-1.11028	0.00382637	0.042421
CDX1	protein_coding	0.692482	0.00386901	0.0427435
TNNC2	protein_coding	0.755161	0.00400628	0.0439214
KCNA3	protein_coding	-0.757644	0.00403749	0.0440901
MOGAT2	protein_coding	-0.98305	0.00404125	0.0440901
GLB1L3	protein_coding	-0.854634	0.0040398	0.0440901
FIGN	protein_coding	-0.704633	0.0040504	0.0441594
STK33	protein_coding	-0.862011	0.00405493	0.0441782
GRIN1	protein_coding	0.810649	0.0040606	0.0441841
ANK1	protein_coding	-0.612842	0.00408775	0.0441933
CRH	protein_coding	-1.96781	0.00408432	0.0441933
MAEL	protein_coding	-1.1885	0.00412961	0.0445538
SLC14A2	protein_coding	-0.655484	0.00416046	0.0447405
GOLT1A	protein_coding	0.589119	0.00416961	0.0447474
KCNT2	protein_coding	0.744632	0.00416943	0.0447474
DAPL1	protein_coding	-0.977067	0.00416441	0.0447474
ACMSD	protein_coding	-0.616498	0.00418751	0.0448479
RBFOX1	protein_coding	-1.18523	0.00419167	0.044862
WNT10A	protein_coding	0.787467	0.00421096	0.0450073
PDZD9	protein_coding	-0.610191	0.00421438	0.0450134
BMP6	protein_coding	-0.788885	0.00422151	0.0450589
VWC2	protein_coding	-1.26184	0.00426165	0.0454566
MAGEB2	protein_coding	1.97436	0.00427384	0.045525
DMRT3	protein_coding	0.823471	0.00432262	0.0458079
NPAS4	protein_coding	0.890135	0.00431958	0.0458079
POU3F4	protein_coding	1.99201	0.00432363	0.0458079
TERT	protein_coding	-0.861288	0.00431661	0.0458079
MC5R	protein_coding	-1.57732	0.00433242	0.0458394
TNIK	protein_coding	-0.63855	0.00436667	0.0461398
SLC38A4	protein_coding	-0.820566	0.00438485	0.0463009
UGT2B4	protein_coding	-1.37138	0.00440153	0.0463581
NCALD	protein_coding	-0.761296	0.00443224	0.0465208
GDF5	protein_coding	0.815878	0.004446	0.0465517
RSPO2	protein_coding	-0.957631	0.00449589	0.0470011
DHDH	protein_coding	0.651013	0.00452097	0.0471383
CCL17	protein_coding	-0.708372	0.00453892	0.0472629
TNN	protein_coding	-0.823834	0.00459201	0.0476584
ACTG2	protein_coding	1.13026	0.00461088	0.0478227
COL3A1	protein_coding	-0.621314	0.00463364	0.0479956
SYTL5	protein_coding	-0.950067	0.00466198	0.0481942
MEGF11	protein_coding	-0.819798	0.00469061	0.0484266
ACTL6B	protein_coding	-0.954238	0.00471348	0.0485991
NEFM	protein_coding	1.05596	0.00472264	0.0486617
LRRD1	protein_coding	-0.622988	0.00475926	0.0488485
CECR2	protein_coding	-0.914701	0.00474887	0.0488485
TF	protein_coding	0.971383	0.00475936	0.0488485
CUX2	protein_coding	-0.728464	0.00478362	0.0490337
SLC13A2	protein_coding	1.21624	0.00479927	0.0491622
KLRC3	protein_coding	-0.893322	0.00481237	0.0492643
MUC3A	protein_coding	-0.779967	0.00485114	0.0495646
RBP7	protein_coding	0.655494	0.00485635	0.0495857
ACOT11	protein_coding	-0.590751	0.00488581	0.049822

## Sheet: supplementary table 2
supplementary table 2. prognostic HRD-associated genes
ENSEMBL	HR	upper95	lower95	p
ENSG00000008300	4.27	11.787	1.55	0.00233
ENSG00000070731	0.303	0.826	0.112	0.0134
ENSG00000077080	2.67	6.56	1.083	0.0265
ENSG00000080511	2.61	6.374	1.072	0.0286
ENSG00000091137	0.378	0.93	0.153	0.0279
ENSG00000091482	0.406	1	0.165	0.0428
ENSG00000103740	0.352	0.905	0.137	0.0236
ENSG00000104371	3.13	8.584	1.141	0.0195
ENSG00000104760	0.324	0.887	0.118	0.0209
ENSG00000109182	2.56	6.584	0.999	0.0425
ENSG00000111305	3.35	9.162	1.222	0.0129
ENSG00000113525	2.7	6.661	1.096	0.0248
ENSG00000119042	3.41	9.323	1.25	0.0108
ENSG00000121101	0.372	1.019	0.136	0.0452
ENSG00000125691	2.78	7.129	1.083	0.0266
ENSG00000125879	3.19	8.011	1.269	0.00948
ENSG00000126259	0.306	0.792	0.118	0.0099
ENSG00000128652	2.4	5.831	0.987	0.047
ENSG00000131951	3.76	9.656	1.462	0.00324
ENSG00000147117	0.366	0.902	0.149	0.0229
ENSG00000147381	0.412	1.015	0.168	0.0467
ENSG00000148288	3.79	10.471	1.369	0.00602
ENSG00000148935	0.344	0.946	0.125	0.0305
ENSG00000157060	0.182	0.616	0.054	0.00207
ENSG00000165084	2.55	6.573	0.986	0.0454
ENSG00000165300	2.49	6.145	1.007	0.0414
ENSG00000168959	0.4	0.983	0.163	0.0388
ENSG00000171532	4.14	10.697	1.603	0.00153
ENSG00000171596	0.412	1.026	0.166	0.0494
ENSG00000172967	2.97	7.661	1.151	0.0181
ENSG00000175315	2.37	5.695	0.982	0.0481
ENSG00000175556	3.22	8.293	1.252	0.0105
ENSG00000184349	2.95	8.041	1.082	0.0267
ENSG00000184792	0.301	0.823	0.11	0.0131
ENSG00000186188	0.38	0.976	0.148	0.0369
ENSG00000186867	0.416	1.024	0.169	0.049
ENSG00000188396	3.12	7.753	1.252	0.0104
ENSG00000189058	0.351	0.9	0.137	0.0227
ENSG00000197140	3.71	10.093	1.367	0.0058
ENSG00000197181	2.57	6.631	0.995	0.0433
ENSG00000197479	2.53	6.269	1.017	0.0391
ENSG00000214510	0.402	0.968	0.167	0.0358
ENSG00000242265	0.409	1.01	0.166	0.0453
ENSG00000244623	0.294	0.755	0.115	0.00693
ENSG00000255690	0.406	1.003	0.164	0.0437
ENSG00000255837	0.372	0.917	0.151	0.0254
ENSG00000261857	0.223	0.662	0.075	0.00309
ENSG00000268902	0.351	0.898	0.137	0.0224

## Sheet: supplementary table 3
Supplementary Table 3. comparison of clincial features in the training set, the testing set and the entire TCGA-TNBC cohort
Covariates	Type	Total(n=506)	Training set(n=253)	Testing set(n=253)	P value
Age(n/%)	＜56	91(56.50)	46(57.50)	45(55.60)	0.374
	≥56	70(43.50)	34(42.50)	36(44.40)
	Unknown	0(0.00)	0(0.00)	0(0.00)
Tumor Stage(n/%)	Stage Ⅰ-Ⅱ	135(83.90)	66(82.50)	69(85.20)	0.862
	Stage Ⅲ-Ⅳ	22(13.70)	14(17.50)	8(9.90)
	Unknown	4(2.50)	0(0.00)	4(4.90)
T Stage(n/%)	T1-2	141(87.60)	72(90.00)	69(85.20)	0.221
	T3-4	19(11.80)	8(10.00)	11(13.60)
	Unknown	1(0.60)	0(0.00)	1(1.20)
M Stage(n/%)	M0	138(85.70)	68(85.0)	70(86.40)	0.069
	M1	3(1.90)	1(1.20)	2(2.50)
	Unknown	20(12.40)	11(13.80)	9(11.10)
N Stage(n/%)	N0	100(62.10)	48(60.00)	52(64.20)	0.056
	N1-3	61(37.90)	32(40.00)	29(35.80)
	Unknown	0(0.00)	0(0.00)	0(0.00)

## Sheet: supplementary table 4
Supplementary Table 4. Multariate analysis of selected sixteen prognostic HRD-associated genes in TNBC
Gene	coef	HR	upper95	lower95	p
ENSG00000070731	-0.0644193	0.303	0.826	0.112	0.0134
ENSG00000077080	0.144622	2.67	6.56	1.083	0.0265
ENSG00000103740	-0.597591	0.352	0.905	0.137	0.0236
ENSG00000104760	-0.138289	0.324	0.887	0.118	0.0209
ENSG00000111305	0.111869	3.35	9.162	1.222	0.0129
ENSG00000125879	0.290864	3.19	8.011	1.269	0.00948
ENSG00000128652	0.0495252	2.4	5.831	0.987	0.047
ENSG00000147117	-0.384941	0.366	0.902	0.149	0.0229
ENSG00000148935	-0.388564	0.344	0.946	0.125	0.0305
ENSG00000168959	-0.100255	0.4	0.983	0.163	0.0388
ENSG00000171532	1.0429	4.14	10.697	1.603	0.00153
ENSG00000184349	0.540879	2.95	8.041	1.082	0.0267
ENSG00000186867	-0.103303	0.416	1.024	0.169	0.049
ENSG00000242265	-0.215963	0.409	1.01	0.166	0.0453
ENSG00000244623	-0.0997526	0.294	0.755	0.115	0.00693
ENSG00000268902	-0.854015	0.351	0.898	0.137	0.0224

## Sheet: supplementary table 5
Supplementary Table 5. differentially expressed genes between high-risk and low-risk groups in TCGA-TNBC cohort
symbol	group	logFC	PValue	FDR
GTSF1	protein_coding	-3.15462	1.83205e-26	1.03472e-21
CGA	protein_coding	-5.31175	1.09305e-20	3.08671e-16
ECEL1	protein_coding	-2.90469	1.68309e-19	3.16864e-15
DIO1	protein_coding	3.14523	4.93096e-19	6.9624e-15
SMR3B	protein_coding	8.62422	9.52462e-16	1.07588e-11
LINC01287	long_non_coding	-3.37813	1.86848e-15	1.75883e-11
CNMD	protein_coding	-4.55699	2.55146e-14	2.05863e-10
CXorf67	protein_coding	-4.16056	7.38009e-14	5.21025e-10
MUC6	protein_coding	2.71556	1.69755e-13	1.06529e-09
CALN1	protein_coding	-2.74054	2.82682e-13	1.59656e-09
ZP2	protein_coding	3.8959	1.21986e-12	6.26333e-09
NEUROD2	protein_coding	1.97433	3.50062e-12	1.6476e-08
RNU5B-1	ncRNA	5.00129	3.8998e-12	1.69428e-08
MAGEA10	protein_coding	-4.25181	1.33639e-11	5.34508e-08
AC089998.4	long_non_coding	-3.15537	1.41957e-11	5.34508e-08
IGLON5	protein_coding	-2.03437	1.85358e-11	6.54303e-08
MAEL	protein_coding	-2.92386	2.72044e-11	8.08673e-08
DCD	protein_coding	3.60848	2.68768e-11	8.08673e-08
AC114956.2	long_non_coding	2.16416	2.61166e-11	8.08673e-08
MYO18B	protein_coding	-2.60723	4.40489e-11	1.24392e-07
SCGB2A2	protein_coding	2.94423	4.95287e-11	1.33206e-07
NEFM	protein_coding	-2.50602	6.33435e-11	1.62617e-07
RNY1	ncRNA	3.63605	7.30813e-11	1.79459e-07
CXCL6	protein_coding	-2.02666	1.69305e-10	3.98423e-07
DHRS2	protein_coding	-2.01263	2.2721e-10	4.93562e-07
NCAN	protein_coding	-3.07957	2.20876e-10	4.93562e-07
C8orf31	long_non_coding	1.84337	2.50461e-10	5.23918e-07
SPDEF	protein_coding	2.04224	2.74075e-10	5.47673e-07
GRIN2C	protein_coding	1.67684	2.81211e-10	5.47673e-07
AC087491.1	long_non_coding	1.71086	3.22294e-10	6.06762e-07
EYA4	protein_coding	-2.14309	4.51348e-10	8.03379e-07
ACTA1	protein_coding	2.35293	4.5518e-10	8.03379e-07
ABCC11	protein_coding	1.87428	4.86053e-10	8.31872e-07
NPHS1	protein_coding	-1.92622	5.03328e-10	8.36101e-07
PRSS12	protein_coding	-1.85382	5.80935e-10	9.37447e-07
CSAG2	protein_coding	-2.78991	7.09229e-10	1.11268e-06
WNT2B	protein_coding	1.07946	8.25436e-10	1.26e-06
SPIB	protein_coding	-2.16414	8.57221e-10	1.27408e-06
PTGFR	protein_coding	-1.67823	1.19211e-09	1.72639e-06
VCX3A	protein_coding	-4.56249	2.46252e-09	3.39222e-06
CSAG1	protein_coding	-3.0454	2.52383e-09	3.39389e-06
FSTL5	protein_coding	-2.85064	3.12253e-09	4.10134e-06
RSPO3	protein_coding	-1.33032	4.72169e-09	6.06082e-06
KLK12	protein_coding	2.16436	4.89696e-09	6.14612e-06
PPP1R1B	protein_coding	1.92675	5.68487e-09	6.97991e-06
CSAG3	protein_coding	-2.63242	6.50111e-09	7.81226e-06
MORC1	protein_coding	-3.11176	8.07017e-09	9.49573e-06
PRSS1	protein_coding	-2.0894	9.29768e-09	1.07168e-05
PCDHA7	protein_coding	1.66997	1.03373e-08	1.16769e-05
C11orf16	protein_coding	-1.76746	1.25127e-08	1.3857e-05
SFTPA2	protein_coding	1.71663	1.43405e-08	1.55757e-05
ELAVL3	protein_coding	2.02642	1.48276e-08	1.58009e-05
INHBE	protein_coding	-1.19243	1.55661e-08	1.59847e-05
TFF3	protein_coding	1.91106	1.5561e-08	1.59847e-05
MAGEB2	protein_coding	-3.51517	1.65582e-08	1.66998e-05
MIR3609	ncRNA	3.10528	1.71727e-08	1.70158e-05
CYP4Z1	protein_coding	2.14034	2.06266e-08	2.00857e-05
AC117402.1	long_non_coding	-1.88905	2.13179e-08	2.0407e-05
AC079600.3	long_non_coding	1.96713	3.03905e-08	2.86071e-05
LINC00514	long_non_coding	1.33248	3.58054e-08	3.31517e-05
CREB3L4	protein_coding	0.785883	3.91698e-08	3.47086e-05
PCDHA3	protein_coding	1.55902	3.81851e-08	3.47086e-05
AC090515.4	long_non_coding	2.0183	3.93305e-08	3.47086e-05
RFX4	protein_coding	-1.85444	4.10104e-08	3.50943e-05
MUC3A	protein_coding	1.40649	4.0945e-08	3.50943e-05
CHST1	protein_coding	1.17515	4.7244e-08	3.98253e-05
HHIPL2	protein_coding	1.8332	4.80367e-08	3.9898e-05
AL356356.1	long_non_coding	1.22462	5.39617e-08	4.37466e-05
CARMN	long_non_coding	1.42809	5.42194e-08	4.37466e-05
AC009283.1	long_non_coding	0.949946	6.37823e-08	5.07374e-05
BNIPL	protein_coding	1.36883	6.86576e-08	5.38571e-05
PPP2R2B	protein_coding	-1.06402	7.58145e-08	5.78639e-05
VCAM1	protein_coding	-1.03849	7.56261e-08	5.78639e-05
GPR17	protein_coding	1.61358	8.01511e-08	6.03581e-05
BRINP3	protein_coding	2.84224	8.51256e-08	6.32607e-05
SLC7A11	protein_coding	-1.0785	9.0849e-08	6.58329e-05
AC011405.1	long_non_coding	1.84936	9.09181e-08	6.58329e-05
AC131571.1	long_non_coding	2.16794	9.50198e-08	6.79319e-05
SP5	protein_coding	-1.76531	1.07943e-07	7.61073e-05
LINC00958	long_non_coding	-1.96671	1.0915e-07	7.61073e-05
DCAF4L2	protein_coding	-4.60239	1.12886e-07	7.77523e-05
PROK2	protein_coding	-1.39073	1.18134e-07	8.03864e-05
MIEN1	protein_coding	0.889708	1.28857e-07	8.66394e-05
CSAG4	pseudogene	-3.84808	1.41396e-07	9.39521e-05
AC079601.1	long_non_coding	1.32491	1.52088e-07	9.98809e-05
STAR	protein_coding	-1.51188	1.63076e-07	0.000105866
LINC00327	long_non_coding	-1.19119	1.65497e-07	0.000106217
LINC00221	long_non_coding	-2.88147	1.7472e-07	0.000110877
AC108860.1	pseudogene	1.46375	1.84155e-07	0.000115565
PGAP3	protein_coding	0.7969	2.07165e-07	0.000128577
GRAMD1B	protein_coding	-1.03227	2.34897e-07	0.000142653
ZNF385B	protein_coding	-1.21214	2.3405e-07	0.000142653
AL390755.1	TEC	-1.79481	2.46891e-07	0.000148342
CXCR2	protein_coding	-1.16911	2.70855e-07	0.000161028
MATN3	protein_coding	1.32993	2.8253e-07	0.000166219
KRT13	protein_coding	-1.90138	2.93003e-07	0.000170604
CCER2	protein_coding	1.24592	2.97568e-07	0.000171493
KLK3	protein_coding	2.29166	3.05343e-07	0.000174197
TCTE1	protein_coding	1.30411	3.19961e-07	0.000180711
CBR3-AS1	long_non_coding	0.857557	3.32858e-07	0.000186133
GRB7	protein_coding	0.871886	3.54195e-07	0.000196123
EDN2	protein_coding	1.46133	3.70408e-07	0.000203109
TRBV4-2	TR	-1.33603	3.74533e-07	0.000203397
SPINK8	protein_coding	2.11783	3.91688e-07	0.000208699
PRSS56	protein_coding	-2.39652	3.91226e-07	0.000208699
COX7A1	protein_coding	0.968029	4.22817e-07	0.00022318
EFNA5	protein_coding	0.90938	4.29126e-07	0.000224413
SCGB3A1	protein_coding	1.92211	4.55254e-07	0.000235893
AC011411.1	pseudogene	2.02994	4.86193e-07	0.000249634
FAM3B	protein_coding	1.61535	5.23309e-07	0.00026627
CLEC4D	protein_coding	-1.13098	5.35148e-07	0.000269863
PAX6	protein_coding	1.29443	5.81357e-07	0.000288011
CLIC2	protein_coding	-0.819368	5.86434e-07	0.000288011
PDE9A	protein_coding	1.03566	5.82675e-07	0.000288011
HMGN1P2	pseudogene	2.65361	6.13013e-07	0.000298469
AC114956.1	long_non_coding	1.65965	6.24961e-07	0.000300611
LINC01169	long_non_coding	-1.8055	6.28059e-07	0.000300611
GBA3	pseudogene	-2.15395	6.34148e-07	0.000300975
GAPDHP39	pseudogene	1.96262	6.66903e-07	0.000313883
KLK14	protein_coding	1.73841	6.93343e-07	0.000323631
CAPN8	protein_coding	1.58237	7.06407e-07	0.000327026
EIF4BP2	pseudogene	1.73745	7.62813e-07	0.000350268
SCARNA10	ncRNA	1.7742	7.72096e-07	0.000351671
PARM1	protein_coding	-0.915618	8.15951e-07	0.000368673
RNU4-1	ncRNA	1.51341	8.80393e-07	0.000391525
AC079598.2	pseudogene	-2.18797	8.79931e-07	0.000391525
ENPP6	protein_coding	-1.0372	9.04794e-07	0.000396138
AL583810.2	long_non_coding	1.16637	8.99468e-07	0.000396138
SERPINB13	protein_coding	-2.541	9.19054e-07	0.000396919
MEG8	long_non_coding	1.72345	9.20631e-07	0.000396919
CADPS	protein_coding	1.12569	9.40047e-07	0.000399236
FAM221B	protein_coding	1.10103	9.40144e-07	0.000399236
FILIP1	protein_coding	1.09387	9.64598e-07	0.000403552
GCNT3	protein_coding	1.60422	9.62466e-07	0.000403552
AC022893.2	long_non_coding	-1.97817	9.84768e-07	0.000408961
ASXL3	protein_coding	-1.68373	1.01475e-06	0.000418336
CHRNA7	protein_coding	-1.10038	1.03377e-06	0.00042309
AC013457.1	long_non_coding	2.26257	1.05558e-06	0.000425845
AC243829.4	long_non_coding	-1.17926	1.04998e-06	0.000425845
PDE7B	protein_coding	-1.00712	1.1533e-06	0.000461967
GZMH	protein_coding	-1.19243	1.16584e-06	0.000463701
SPOCD1	protein_coding	1.03859	1.17501e-06	0.000464078
HIST2H2AC	protein_coding	1.00529	1.22487e-06	0.000480412
NXN	protein_coding	0.65272	1.28108e-06	0.000498992
RNU1-88P	ncRNA	3.42376	1.30402e-06	0.000504452
CSF2RB	protein_coding	-1.11769	1.3318e-06	0.000508058
LHFPL4	protein_coding	-1.88026	1.34033e-06	0.000508058
GAPDHP42	pseudogene	1.58968	1.33879e-06	0.000508058
HPX	protein_coding	0.842247	1.40488e-06	0.000526757
FLNB-AS1	long_non_coding	0.920523	1.40832e-06	0.000526757
RNU1-124P	ncRNA	2.42382	1.44016e-06	0.000535123
ADGRE1	protein_coding	-1.17301	1.49051e-06	0.000550212
MCTP2	protein_coding	-1.18055	1.52826e-06	0.000560483
AC024451.3	pseudogene	1.91489	1.54293e-06	0.000562213
MUCL1	protein_coding	1.92887	1.55509e-06	0.000563014
SLC39A2	protein_coding	1.53925	1.5909e-06	0.000572307
SNORA22C	ncRNA	2.4614	1.64612e-06	0.00058668
AC068756.1	long_non_coding	-3.12187	1.65163e-06	0.00058668
SSX1	protein_coding	-3.9937	1.68377e-06	0.00059067
CTSE	protein_coding	-1.63862	1.68299e-06	0.00059067
TNFRSF11B	protein_coding	-1.38942	1.84449e-06	0.000643057
RADIL	protein_coding	1.21215	1.98548e-06	0.000687963
GPR22	protein_coding	1.73505	2.00286e-06	0.000689754
AC004540.2	long_non_coding	-1.14731	2.06264e-06	0.00070018
AP001429.1	long_non_coding	1.13693	2.07033e-06	0.00070018
AC087045.2	long_non_coding	1.34181	2.04814e-06	0.00070018
TFAP2B	protein_coding	1.7936	2.18735e-06	0.00073269
ZNF157	protein_coding	-0.962992	2.1924e-06	0.00073269
SCARNA6	ncRNA	1.36378	2.27311e-06	0.000755193
ASPHD2	protein_coding	-0.68997	2.35861e-06	0.000779018
KIF19	protein_coding	1.41753	2.38082e-06	0.000781782
DSCR8	protein_coding	-3.23953	2.54563e-06	0.000831066
MAGEA12	protein_coding	-3.98805	2.57092e-06	0.0008345
PCDHGA11	protein_coding	0.993967	2.62862e-06	0.000846833
AL445309.1	long_non_coding	1.0242	2.6389e-06	0.000846833
OLIG1	protein_coding	1.84053	2.72637e-06	0.000869958
AMDHD1	protein_coding	-1.20014	2.74526e-06	0.000871066
LINC00158	long_non_coding	-1.14472	2.82266e-06	0.00089062
PLA2G2C	protein_coding	1.30733	2.89389e-06	0.000908022
VWC2L	protein_coding	2.27232	2.96839e-06	0.000926254
CNN1	protein_coding	1.12574	2.99315e-06	0.000928846
MNX1-AS2	long_non_coding	1.44518	3.09568e-06	0.000955414
C21orf2	protein_coding	0.624035	3.20141e-06	0.000979814
AC091044.1	long_non_coding	2.26744	3.20943e-06	0.000979814
SPINK5	protein_coding	-1.79246	3.28891e-06	0.000993801
CCL5	protein_coding	-1.05792	3.29044e-06	0.000993801
TM4SF1-AS1	long_non_coding	1.3856	3.32663e-06	0.0009941
RN7SKP23	TEC	1.02672	3.31118e-06	0.0009941
AC020612.3	long_non_coding	1.27735	3.3781e-06	0.00099891
PRF1	protein_coding	-1.01745	3.51963e-06	0.00102997
PRSS2	protein_coding	-1.78952	3.51565e-06	0.00102997
GPR160	protein_coding	0.990948	3.57439e-06	0.00103527
RPRML	protein_coding	1.9136	3.55974e-06	0.00103527
AC087045.3	TEC	2.33711	3.59578e-06	0.00103615
PHEX	protein_coding	-1.07041	3.73892e-06	0.00106561
RBP2	protein_coding	1.25114	3.7546e-06	0.00106561
NDP	protein_coding	-1.33379	3.74825e-06	0.00106561
AC080038.2	long_non_coding	1.29125	3.81134e-06	0.0010763
AL139274.1	pseudogene	2.53596	3.94199e-06	0.00110766
AC134407.3	TEC	0.845241	3.98109e-06	0.00111311
AC087645.2	long_non_coding	-0.968792	4.04403e-06	0.00112514
LINC00488	long_non_coding	-2.61397	4.1118e-06	0.00113283
AL117190.1	long_non_coding	1.48549	4.09262e-06	0.00113283
AC055764.1	long_non_coding	2.03679	4.19616e-06	0.00115046
LAMA3	protein_coding	-1.13415	4.28559e-06	0.0011693
SCGB3A2	protein_coding	1.55703	4.44196e-06	0.00120614
CEACAM6	protein_coding	1.86253	4.49069e-06	0.00121354
CACNG1	protein_coding	1.64012	4.63366e-06	0.00124289
AL049698.1	long_non_coding	-1.52463	4.64331e-06	0.00124289
SERPINB4	protein_coding	-2.21637	4.71437e-06	0.00125596
LMX1B	protein_coding	1.14194	4.81153e-06	0.0012581
AC018552.3	pseudogene	-1.50151	4.7709e-06	0.0012581
AC104763.3	pseudogene	2.49512	4.78899e-06	0.0012581
AL353583.1	TEC	1.48421	4.79639e-06	0.0012581
AC087286.1	long_non_coding	3.1712	4.88296e-06	0.0012709
AC021231.1	long_non_coding	1.97163	4.97283e-06	0.00128835
2021-03-04	protein_coding	1.04361	5.03905e-06	0.00129364
FOXP1-IT1	long_non_coding	1.49758	5.03465e-06	0.00129364
PNPT1P1	pseudogene	1.55905	5.1004e-06	0.00129411
CBX5P1	pseudogene	1.8391	5.13254e-06	0.00129411
AC020900.1	long_non_coding	1.92293	5.12463e-06	0.00129411
AC016705.2	long_non_coding	-1.28588	5.10533e-06	0.00129411
PCDH8	protein_coding	-1.60136	5.29036e-06	0.00132798
AC023024.1	long_non_coding	-0.86941	5.36066e-06	0.00133967
C9orf24	protein_coding	1.06548	5.61929e-06	0.00139811
BPIFB2	protein_coding	2.08804	5.66884e-06	0.00140426
IGFL3	protein_coding	1.73373	5.7136e-06	0.00140916
AC005332.4	pseudogene	1.25544	5.78338e-06	0.00142017
AC133681.1	pseudogene	-2.06677	5.88976e-06	0.00144003
PAEP	protein_coding	1.60227	5.95882e-06	0.00145064
SCGB2A1	protein_coding	1.6993	6.01e-06	0.00145682
AC092139.4	TEC	1.64434	6.18042e-06	0.00149173
AL161909.2	long_non_coding	2.39958	6.25564e-06	0.00150346
SDC1	protein_coding	0.770479	6.30806e-06	0.00150963
IGLV9-49	IG	-1.73968	6.35226e-06	0.00151379
IDO1	protein_coding	-1.46139	6.49135e-06	0.00153399
LINC01843	long_non_coding	-1.73441	6.48592e-06	0.00153399
ERVH48-1	long_non_coding	1.38699	6.53102e-06	0.00153694
DDX25	protein_coding	-1.1825	6.6749e-06	0.00156428
CYP24A1	protein_coding	-1.51676	6.89363e-06	0.00160886
EFNA3	protein_coding	0.886613	7.01061e-06	0.00162943
AC036176.2	pseudogene	1.69271	7.15141e-06	0.00164859
SRCIN1	protein_coding	0.975244	7.12262e-06	0.00164859
AC069437.1	long_non_coding	2.46799	7.25187e-06	0.00166495
CD40	protein_coding	-0.785122	7.47668e-06	0.0016757
MYO7A	protein_coding	-0.754046	7.35439e-06	0.0016757
JPH2	protein_coding	1.20017	7.47027e-06	0.0016757
GLT1D1	protein_coding	-0.885745	7.37107e-06	0.0016757
RNU6-171P	ncRNA	3.15773	7.46146e-06	0.0016757
RN7SL473P	ncRNA	1.39075	7.44729e-06	0.0016757
TAS2R30	protein_coding	1.89184	7.55538e-06	0.00168
NEUROG2	protein_coding	1.8114	7.59367e-06	0.00168189
UGT2B11	protein_coding	2.54305	7.62505e-06	0.00168225
AL136984.1	long_non_coding	1.89828	7.74378e-06	0.00170179
AC005034.2	long_non_coding	1.23313	7.81735e-06	0.0017113
ASB9	protein_coding	-0.773846	7.96183e-06	0.00172188
AGT	protein_coding	1.52452	7.94205e-06	0.00172188
AC022126.1	long_non_coding	-1.16797	7.91343e-06	0.00172188
RNF113B	protein_coding	2.23337	8.02475e-06	0.00172331
IL17REL	protein_coding	-1.5883	8.18146e-06	0.0017503
MGAT4C	protein_coding	-1.43407	8.42028e-06	0.00178785
ILF2P1	pseudogene	1.40792	8.91664e-06	0.00187912
AC087749.2	long_non_coding	2.12111	8.89139e-06	0.00187912
FYN	protein_coding	-0.666619	9.01422e-06	0.00189262
AP000688.2	long_non_coding	1.42095	9.19278e-06	0.00192296
AL513217.1	long_non_coding	1.31651	9.3424e-06	0.00193531
AC124283.3	long_non_coding	1.02721	9.3546e-06	0.00193531
AL360169.2	long_non_coding	2.03299	9.29819e-06	0.00193531
MAK	protein_coding	-0.699696	9.44837e-06	0.00194049
RNU6-123P	ncRNA	2.34533	9.41627e-06	0.00194049
ISL1	protein_coding	-1.86962	9.73363e-06	0.00198824
HAS2	protein_coding	-0.950049	9.75129e-06	0.00198824
PCDHB4	protein_coding	1.00715	9.89788e-06	0.00201087
KLK5	protein_coding	1.70425	1.00944e-05	0.00202238
RIIAD1	protein_coding	1.31028	1.02052e-05	0.00202238
FDX1P1	pseudogene	1.29268	1.01273e-05	0.00202238
RNU4-2	ncRNA	1.41412	1.02018e-05	0.00202238
SNORA22	ncRNA	1.24015	1.01742e-05	0.00202238
HSPE1P26	pseudogene	2.13329	1.01562e-05	0.00202238
AC132938.6	TEC	0.919081	1.0143e-05	0.00202238
SLC5A11	protein_coding	-1.20534	1.0422e-05	0.00205813
SNORA12	ncRNA	1.48129	1.07259e-05	0.00211076
MYBPC2	protein_coding	-1.08571	1.08225e-05	0.00212237
SLC25A29	protein_coding	0.682718	1.09632e-05	0.00213317
AC089998.1	long_non_coding	-1.75183	1.09791e-05	0.00213317
IL13RA2	protein_coding	-1.14471	1.11611e-05	0.00215415
RN7SKP185	ncRNA	2.32445	1.1181e-05	0.00215415
TTC3-AS1	long_non_coding	0.952619	1.12134e-05	0.00215415
HLA-DPA1	protein_coding	-0.877425	1.12572e-05	0.00215523
MYT1L	protein_coding	-1.60157	1.13349e-05	0.00216277
TMEM155	protein_coding	-0.95304	1.142e-05	0.00217169
PRR15L	protein_coding	0.94523	1.16105e-05	0.00220051
MXRA8	protein_coding	0.961799	1.17354e-05	0.00221673
NECAP1P2	pseudogene	2.25754	1.20126e-05	0.00226154
AC087525.1	long_non_coding	1.40915	1.21257e-05	0.00227012
AC244093.3	long_non_coding	2.09617	1.21386e-05	0.00227012
POU5F1B	protein_coding	0.8947	1.22352e-05	0.00228064
AC007496.1	long_non_coding	1.87546	1.24325e-05	0.00230978
WARS	protein_coding	-0.82936	1.27357e-05	0.00235835
AC008781.2	long_non_coding	2.13656	1.29189e-05	0.00238447
CALCA	protein_coding	-1.82016	1.30774e-05	0.00239028
PKIA-AS1	long_non_coding	1.28925	1.30051e-05	0.00239028
AP001542.1	pseudogene	0.846697	1.30382e-05	0.00239028
SNORA23	ncRNA	1.51113	1.31843e-05	0.00240206
SNORA73	ncRNA	2.33137	1.33383e-05	0.00241454
AC138409.1	pseudogene	1.32595	1.33052e-05	0.00241454
ACSL5	protein_coding	-0.761679	1.35236e-05	0.00243447
HLA-DOA	protein_coding	-0.962653	1.35777e-05	0.00243447
AL121989.1	long_non_coding	1.71379	1.35617e-05	0.00243447
GZMB	protein_coding	-1.12984	1.39304e-05	0.00248979
AL096855.1	long_non_coding	1.02474	1.40006e-05	0.00249445
RPS12P17	pseudogene	1.99044	1.41199e-05	0.0025078
AL157402.2	long_non_coding	2.22082	1.43536e-05	0.0025413
IGLV3-9	IG	-1.6637	1.44223e-05	0.0025455
KLK11	protein_coding	1.85392	1.46062e-05	0.00256991
LIPF	protein_coding	-2.55562	1.46965e-05	0.00257777
AC015920.1	TEC	2.43544	1.47946e-05	0.00258695
PCDHB5	protein_coding	1.43872	1.52054e-05	0.00262625
AL353691.1	pseudogene	2.48917	1.51796e-05	0.00262625
FO393419.2	long_non_coding	2.73499	1.50786e-05	0.00262625
AL513318.2	long_non_coding	-1.855	1.51398e-05	0.00262625
OTOGL	protein_coding	-1.16091	1.56086e-05	0.00265529
PRSS48	protein_coding	2.22764	1.5602e-05	0.00265529
AC005077.4	pseudogene	1.09287	1.543e-05	0.00265529
JTBP1	pseudogene	1.95677	1.56052e-05	0.00265529
AP003559.1	long_non_coding	0.995985	1.56886e-05	0.0026609
TBC1D22A-AS1	long_non_coding	2.02532	1.67223e-05	0.00282772
DUTP6	pseudogene	0.688574	1.7732e-05	0.00297583
U62317.5	long_non_coding	-0.983	1.77563e-05	0.00297583
AC120349.3	TEC	1.79351	1.76607e-05	0.00297583
AC110023.1	long_non_coding	-1.74747	1.7877e-05	0.00298276
AC020661.4	long_non_coding	1.75629	1.79032e-05	0.00298276
NTSR1	protein_coding	1.34476	1.80948e-05	0.00300581
MUC13	protein_coding	-1.56014	1.82877e-05	0.00302895
AL356057.1	pseudogene	2.64616	1.84192e-05	0.00304181
MISP3	protein_coding	0.941399	1.8535e-05	0.00304878
AC010487.2	long_non_coding	0.78255	1.85694e-05	0.00304878
MOXD1	protein_coding	-1.08995	1.90663e-05	0.00311537
SPINK1	protein_coding	1.23035	1.93471e-05	0.00313096
MROH9	protein_coding	1.21395	1.98985e-05	0.00319514
RN7SKP271	ncRNA	1.25905	1.99669e-05	0.00319514
HMGB3P14	pseudogene	1.67179	1.997e-05	0.00319514
AP000892.3	TEC	0.926616	1.98355e-05	0.00319514
AP001062.1	long_non_coding	0.688891	2.0226e-05	0.00321048
AZGP1P1	pseudogene	1.16398	2.02933e-05	0.00321048
AC117500.3	long_non_coding	1.38868	2.02894e-05	0.00321048
AL110505.1	long_non_coding	2.09064	2.025e-05	0.00321048
AL592429.1	pseudogene	-1.2245	2.0949e-05	0.00329576
AP005432.1	long_non_coding	1.17633	2.12464e-05	0.00333327
LRRC10B	protein_coding	1.12561	2.16347e-05	0.00338478
RBP5	protein_coding	-0.988975	2.176e-05	0.00339499
QRFPR	protein_coding	-1.77742	2.20026e-05	0.00341397
AC128709.2	long_non_coding	1.556	2.21101e-05	0.00342125
DANT2	long_non_coding	0.990257	2.22253e-05	0.00342968
AL354794.2	pseudogene	1.28193	2.32066e-05	0.00357135
HSPE1P27	pseudogene	2.38278	2.34092e-05	0.00359273
PCSK6	protein_coding	-0.877705	2.36841e-05	0.00360975
MYEOV	protein_coding	1.66301	2.35896e-05	0.00360975
AL353771.1	long_non_coding	2.09788	2.37118e-05	0.00360975
GZMA	protein_coding	-0.97605	2.38155e-05	0.0036158
AC096887.1	protein_coding	0.585524	2.44078e-05	0.00369578
AC008080.1	long_non_coding	1.45847	2.46377e-05	0.00370869
AL513365.2	long_non_coding	0.909732	2.45967e-05	0.00370869
AC016954.1	pseudogene	2.10827	2.469e-05	0.00370869
HLA-DQA2	protein_coding	-1.18981	2.4845e-05	0.00372207
TNFAIP2	protein_coding	-0.899952	2.50924e-05	0.0037322
IGFL1	protein_coding	1.59068	2.50494e-05	0.0037322
AP001625.2	long_non_coding	1.02212	2.51108e-05	0.0037322
AFF3	protein_coding	-1.11535	2.52675e-05	0.00374562
CLEC12A	protein_coding	-0.999427	2.58049e-05	0.00381528
AC017101.1	long_non_coding	1.58616	2.62919e-05	0.00387712
AC099689.1	TEC	2.05028	2.65273e-05	0.00390166
RNU5E-1	ncRNA	1.77001	2.67314e-05	0.00392146
OR2I1P	pseudogene	-1.30753	2.68955e-05	0.00393532
SNORA74B	ncRNA	1.86987	2.73746e-05	0.00399343
LINC02005	long_non_coding	-1.64112	2.74341e-05	0.00399343
PACRG-AS1	long_non_coding	-1.22733	2.75084e-05	0.00399395
PRMT8	protein_coding	1.5754	2.77459e-05	0.00400782
SNCA	protein_coding	-0.812078	2.77337e-05	0.00400782
PTTG4P	pseudogene	1.72052	2.79415e-05	0.00402579
RPS3P2	pseudogene	1.32333	2.81923e-05	0.00405158
AL034349.1	long_non_coding	2.5702	2.82996e-05	0.00405669
AC121247.1	long_non_coding	0.815823	2.85493e-05	0.00408212
CCL28	protein_coding	1.35821	2.86481e-05	0.0040859
AC022390.1	long_non_coding	-0.935886	2.87642e-05	0.00409213
RPS24P16	pseudogene	1.7126	2.90032e-05	0.00411576
SNORA49	ncRNA	2.09471	2.90962e-05	0.00411861
AC099811.6	TEC	1.57705	2.91907e-05	0.00412165
TBL1XR1-AS1	long_non_coding	1.3007	2.93875e-05	0.00413909
IFNG	protein_coding	-1.2961	2.96778e-05	0.00416958
AC130371.2	long_non_coding	0.940722	2.99713e-05	0.00420038
SEMA3A	protein_coding	-1.07741	3.06573e-05	0.00422316
ATP6V1B1	protein_coding	1.14105	3.03807e-05	0.00422316
PLBD1	protein_coding	-0.595967	3.02325e-05	0.00422316
U62317.1	long_non_coding	-1.52482	3.04695e-05	0.00422316
TIMM8AP1	pseudogene	1.08432	3.0561e-05	0.00422316
AC007731.4	long_non_coding	2.16468	3.03021e-05	0.00422316
RPS27AP7	pseudogene	1.8004	3.05899e-05	0.00422316
AL513523.1	pseudogene	0.855033	3.10647e-05	0.00426887
AL356320.1	pseudogene	2.52272	3.18979e-05	0.00437273
TXLNB	protein_coding	-1.01647	3.20778e-05	0.00437614
BCAN	protein_coding	-1.44165	3.22129e-05	0.00438399
AC096947.1	long_non_coding	1.76624	3.26411e-05	0.00443158
TGM2	protein_coding	-0.75017	3.29633e-05	0.0044646
AC011374.1	long_non_coding	-1.2013	3.34328e-05	0.00451735
AC074276.1	pseudogene	1.78797	3.35521e-05	0.00452265
AL031280.1	long_non_coding	1.11416	3.36471e-05	0.00452466
SCARNA1	ncRNA	1.98949	3.39797e-05	0.00455852
DCST2	protein_coding	0.688018	3.41527e-05	0.00457088
EEF1B2P7	pseudogene	1.33719	3.45644e-05	0.00461274
AC025518.2	pseudogene	1.69548	3.46289e-05	0.00461274
AC023024.2	TEC	-0.920115	3.55741e-05	0.0047275
LINC00342	long_non_coding	0.637035	3.57567e-05	0.00474062
BTF3P12	pseudogene	1.44718	3.6036e-05	0.00475532
ETV5-AS1	long_non_coding	1.46055	3.60243e-05	0.00475532
REM1	protein_coding	-1.01805	3.62028e-05	0.00476476
AL355385.1	long_non_coding	0.602444	3.62762e-05	0.00476476
AC073592.5	TEC	2.12222	3.70203e-05	0.00485121
PRSS27	protein_coding	0.925502	3.75617e-05	0.00489941
GABRG3	protein_coding	-1.59238	3.75221e-05	0.00489941
RBPMSLP	pseudogene	2.36422	3.81283e-05	0.00496186
GNAI1	protein_coding	-0.591718	3.83192e-05	0.00496417
ARHGAP26	protein_coding	-0.619851	3.83218e-05	0.00496417
CLEC4E	protein_coding	-0.965453	3.85726e-05	0.00496875
TMEM14EP	pseudogene	1.84266	3.845e-05	0.00496875
AP001962.1	TEC	1.7585	3.86211e-05	0.00496875
CSF2	protein_coding	-0.940639	3.89663e-05	0.00497949
HLA-DRB5	protein_coding	-0.939839	3.8844e-05	0.00497949
BMS1P8	pseudogene	-1.81228	3.92785e-05	0.0050077
AC010425.1	long_non_coding	-1.59448	3.94071e-05	0.00501278
AL356776.1	pseudogene	1.88088	3.97438e-05	0.00504425
C1S	protein_coding	-0.816585	4.01947e-05	0.00506731
SETP5	pseudogene	1.33782	4.0115e-05	0.00506731
PCDHA10	protein_coding	1.18612	4.047e-05	0.00509065
AC007684.1	long_non_coding	0.813667	4.09435e-05	0.00513878
SIX2	protein_coding	1.16084	4.1268e-05	0.00516802
UBE2L6	protein_coding	-0.720649	4.20033e-05	0.0051962
AL109924.2	long_non_coding	1.11855	4.20451e-05	0.0051962
AL139128.1	pseudogene	0.908351	4.17976e-05	0.0051962
AC068389.4	long_non_coding	2.22492	4.17503e-05	0.0051962
AP001533.1	pseudogene	1.15754	4.18598e-05	0.0051962
AL356805.1	long_non_coding	2.49743	4.20211e-05	0.0051962
FANCD2OS	protein_coding	1.01414	4.23858e-05	0.00521549
HIST1H4L	protein_coding	2.03084	4.23317e-05	0.00521549
MAGEA1	protein_coding	-2.81612	4.26709e-05	0.00523158
AC108134.1	long_non_coding	0.749249	4.28872e-05	0.00523158
DOK6	protein_coding	0.888121	4.28614e-05	0.00523158
AC016245.1	long_non_coding	1.48635	4.284e-05	0.00523158
AC073534.1	pseudogene	0.866156	4.30086e-05	0.00523509
LINC02257	long_non_coding	1.10446	4.31485e-05	0.00524083
SLC12A1	protein_coding	1.46916	4.35737e-05	0.00526642
PCCA-AS1	long_non_coding	1.74763	4.3799e-05	0.00526642
AC015910.1	pseudogene	1.56553	4.37771e-05	0.00526642
AC011483.3	long_non_coding	1.64813	4.38255e-05	0.00526642
HIC1	protein_coding	0.64968	4.41129e-05	0.00527239
IGHV2-26	IG	-1.58996	4.41552e-05	0.00527239
AC006159.1	long_non_coding	2.3255	4.40175e-05	0.00527239
AC234917.1	long_non_coding	1.11159	4.44422e-05	0.00529547
MAB21L2	protein_coding	1.82113	4.46763e-05	0.00529744
IGHV1-24	IG	-1.41651	4.47401e-05	0.00529744
PRKCA-AS1	long_non_coding	2.5549	4.46705e-05	0.00529744
HOXD3	protein_coding	0.77503	4.50562e-05	0.0053237
CLDN6	protein_coding	-1.61511	4.56167e-05	0.00537868
AC020913.1	long_non_coding	1.42194	4.5712e-05	0.00537868
IL15	protein_coding	-0.796312	4.59843e-05	0.00539948
MAGEC1	protein_coding	-2.64746	4.65883e-05	0.00544774
LINC00473	long_non_coding	-1.53905	4.65524e-05	0.00544774
SCGB2B2	protein_coding	0.82319	4.68502e-05	0.00546705
NCEH1	protein_coding	-0.746097	4.8618e-05	0.00564999
LINC01655	long_non_coding	1.17078	4.85902e-05	0.00564999
APOBEC3G	protein_coding	-0.761805	4.87382e-05	0.00565232
IGFL2-AS1	long_non_coding	1.54727	4.88614e-05	0.00565501
AF178030.1	long_non_coding	1.24839	4.90565e-05	0.00566598
AC099398.1	long_non_coding	1.51956	4.97803e-05	0.00572669
AC006262.2	long_non_coding	1.7934	4.9785e-05	0.00572669
BMP2	protein_coding	-1.0676	5.05032e-05	0.0057975
AC011389.1	long_non_coding	1.77492	5.11138e-05	0.00582028
AC023886.1	long_non_coding	1.67978	5.09699e-05	0.00582028
AC009269.3	long_non_coding	1.96802	5.10349e-05	0.00582028
SLC38A8	protein_coding	1.42569	5.13605e-05	0.0058366
CXCL5	protein_coding	-1.45605	5.159e-05	0.0058509
USH1C	protein_coding	-1.29987	5.28173e-05	0.0059676
RASA2-IT1	long_non_coding	2.33378	5.28519e-05	0.0059676
AC124319.2	long_non_coding	0.870449	5.29359e-05	0.0059676
AC016999.1	long_non_coding	0.864581	5.30528e-05	0.00596886
AC108704.2	TEC	0.987986	5.32847e-05	0.00598303
FASLG	protein_coding	-1.06699	5.33927e-05	0.00598327
ST13P10	pseudogene	1.20783	5.4202e-05	0.00600249
CROCC2	protein_coding	1.08852	5.39273e-05	0.00600249
RPS27AP8	pseudogene	1.95141	5.37465e-05	0.00600249
VSIG8	protein_coding	0.731091	5.41719e-05	0.00600249
AC093599.1	long_non_coding	-1.94475	5.41592e-05	0.00600249
MTDHP1	pseudogene	0.831804	5.41427e-05	0.00600249
AP001360.2	long_non_coding	-1.87537	5.44914e-05	0.00602274
LINC02097	long_non_coding	0.944575	5.50391e-05	0.0060714
LY6H	protein_coding	0.998006	5.61344e-05	0.00616814
AC010261.2	long_non_coding	1.91253	5.61345e-05	0.00616814
AC008760.2	long_non_coding	-1.28123	5.67594e-05	0.00620061
GPR12	protein_coding	1.54718	5.72326e-05	0.00621223
GPRC5C	protein_coding	1.09899	5.73058e-05	0.00621223
AC122129.1	long_non_coding	0.846715	5.72547e-05	0.00621223
IRAK2	protein_coding	-0.7251	5.75677e-05	0.00621676
LENEP	protein_coding	0.913046	5.75041e-05	0.00621676
FAM129A	protein_coding	-0.676025	5.78294e-05	0.00622581
AC004982.1	long_non_coding	0.771073	5.7872e-05	0.00622581
AL138847.2	TEC	1.34149	5.83915e-05	0.00626976
IGHV3-13	IG	-1.50975	5.90362e-05	0.00631128
AC044840.1	long_non_coding	1.44243	5.90477e-05	0.00631128
AC009166.2	TEC	2.12595	5.91134e-05	0.00631128
NSRP1P1	pseudogene	1.08907	6.07897e-05	0.006478
HMSD	protein_coding	-1.1751	6.14221e-05	0.00652079
SLFNL1-AS1	long_non_coding	0.659213	6.13628e-05	0.00652079
AC079336.6	TEC	0.959731	6.17184e-05	0.00653995
AL592301.1	long_non_coding	0.999471	6.18423e-05	0.00654081
IGHV1-58	IG	-1.46417	6.21939e-05	0.00654125
AC133106.1	long_non_coding	2.80664	6.21449e-05	0.00654125
KCTD9P5	pseudogene	2.96029	6.20454e-05	0.00654125
ZNF587P1	pseudogene	1.89986	6.27795e-05	0.00659056
LINC00648	long_non_coding	-2.02104	6.31299e-05	0.00661505
AP001065.1	long_non_coding	-1.28266	6.36052e-05	0.00662969
SMYD3-IT1	long_non_coding	2.12624	6.36217e-05	0.00662969
AC004263.2	long_non_coding	1.12993	6.34742e-05	0.00662969
SOD2	protein_coding	-0.668197	6.38406e-05	0.00664024
PCDHB12	protein_coding	0.838595	6.45194e-05	0.00666235
FSIP2	protein_coding	1.17258	6.44359e-05	0.00666235
IGLV7-46	IG	-1.3374	6.46429e-05	0.00666235
AC084024.2	pseudogene	2.03188	6.45775e-05	0.00666235
AC090617.5	long_non_coding	1.42121	6.42002e-05	0.00666235
FAM207A	protein_coding	0.611302	6.54421e-05	0.00668904
VPS37D	protein_coding	0.878737	6.54941e-05	0.00668904
RPL21P32	pseudogene	1.69331	6.50267e-05	0.00668904
AC089984.2	pseudogene	1.09376	6.5438e-05	0.00668904
LRRC36	protein_coding	0.78231	6.60682e-05	0.0067355
CEBPA	protein_coding	-0.789519	6.63715e-05	0.00674208
IGFL1P1	pseudogene	1.31075	6.63315e-05	0.00674208
PCDHA9	protein_coding	1.17397	6.68011e-05	0.00677354
RN7SKP239	ncRNA	1.08202	6.73428e-05	0.00681623
TRAV3	TR	-0.996355	6.81685e-05	0.00688746
RNU1-13P	ncRNA	2.26018	6.8316e-05	0.00689004
LINC01423	long_non_coding	1.4628	6.85955e-05	0.00690589
AL109754.1	long_non_coding	-1.32555	6.89958e-05	0.00693383
AF130417.1	long_non_coding	2.53126	6.95585e-05	0.00695327
AL929236.1	long_non_coding	0.907535	6.95379e-05	0.00695327
AC010735.2	long_non_coding	0.957126	6.93366e-05	0.00695327
AC105094.1	long_non_coding	1.6462	6.98002e-05	0.0069651
AL161773.1	TEC	1.2074	7.04573e-05	0.00701827
PKHD1L1	protein_coding	-1.05571	7.17997e-05	0.00710188
HSPD1P11	pseudogene	1.178	7.15522e-05	0.00710188
STARD3	protein_coding	0.593093	7.22925e-05	0.00713813
RN7SL2	ncRNA	0.947035	7.2551e-05	0.00715115
TUBB4A	protein_coding	1.39142	7.30818e-05	0.00716861
S100A1	protein_coding	1.26621	7.31399e-05	0.00716861
CLEC7A	protein_coding	-0.896798	7.3075e-05	0.00716861
NHLH2	protein_coding	1.39983	7.32963e-05	0.00716861
AC010478.1	long_non_coding	-1.40146	7.33628e-05	0.00716861
AC069029.1	long_non_coding	2.59644	7.38086e-05	0.00718731
AC133065.4	long_non_coding	-0.702607	7.37467e-05	0.00718731
AC139887.4	long_non_coding	0.785005	7.44508e-05	0.00723736
U1	ncRNA	2.22866	7.47004e-05	0.00724915
TAPBPL	protein_coding	-0.698793	7.62501e-05	0.00735563
AL365436.1	pseudogene	0.633185	7.61336e-05	0.00735563
AC034105.3	pseudogene	1.85104	7.63186e-05	0.00735563
AC022001.2	long_non_coding	1.92423	7.60777e-05	0.00735563
ADCY8	protein_coding	-1.86098	7.67323e-05	0.00737034
ASPG	protein_coding	1.35953	7.72371e-05	0.00740431
OPRPN	protein_coding	2.53144	7.74792e-05	0.00740431
MAGI1-AS1	long_non_coding	2.62655	7.73541e-05	0.00740431
STYK1	protein_coding	-0.680408	7.77525e-05	0.00741788
MIR9-3HG	long_non_coding	-0.95727	7.81596e-05	0.00744414
ARID5A	protein_coding	0.71885	8.13428e-05	0.00773007
AL121759.1	long_non_coding	1.48008	8.14354e-05	0.00773007
GTF2IP7	pseudogene	1.02855	8.18105e-05	0.00775264
AC002558.3	long_non_coding	1.76154	8.19669e-05	0.00775445
SLC6A1	protein_coding	0.750345	8.2447e-05	0.00778683
AL137145.1	long_non_coding	0.868153	8.27258e-05	0.00780012
LIPJ	protein_coding	-0.9095	8.36293e-05	0.00787217
LYNX1	protein_coding	0.926039	8.40377e-05	0.00789744
KCNT2	protein_coding	-0.96936	8.49068e-05	0.0079642
GCSAML	protein_coding	-0.991445	8.503e-05	0.0079642
TSPYL6	protein_coding	-1.60316	8.56871e-05	0.00801245
AL137224.1	long_non_coding	1.51837	8.62513e-05	0.00805188
FAR2	protein_coding	-0.785331	8.72451e-05	0.00810786
LAMTOR5P1	pseudogene	1.92163	8.72817e-05	0.00810786
AC090197.1	long_non_coding	-0.643513	8.71276e-05	0.00810786
KRT7-AS	long_non_coding	0.747913	8.8893e-05	0.00823047
IGLV4-3	IG	-1.54612	8.90992e-05	0.00823606
DRC7	protein_coding	-0.908321	8.93432e-05	0.00824512
MAPT	protein_coding	0.957278	8.95724e-05	0.00825279
Y_RNA	ncRNA	0.723291	9.04861e-05	0.00832339
GLIS2-AS1	long_non_coding	0.814198	9.13316e-05	0.00838751
WFDC1	protein_coding	1.05696	9.23372e-05	0.00846609
AL033384.2	long_non_coding	0.616844	9.26149e-05	0.00847779
PCDHB13	protein_coding	0.929744	9.29649e-05	0.00849606
OSTCP8	pseudogene	1.47091	9.48065e-05	0.00865037
LY6L	protein_coding	2.88443	9.51054e-05	0.00866364
MT1H	protein_coding	-1.07408	9.60925e-05	0.00871163
AC134407.1	long_non_coding	1.09105	9.6095e-05	0.00871163
ANKRD36C	protein_coding	0.763965	9.65867e-05	0.00873647
GJC3	protein_coding	0.914802	9.66783e-05	0.00873647
MTOR-AS1	long_non_coding	1.93354	9.84404e-05	0.00887078
AL365436.2	long_non_coding	0.792992	9.84787e-05	0.00887078
IL18RAP	protein_coding	-0.8038	9.88234e-05	0.00888766
KITLG	protein_coding	-0.815892	9.90974e-05	0.00889241
ANKRD35	protein_coding	1.02433	9.93776e-05	0.008895
CPVL	protein_coding	-0.621771	9.96783e-05	0.00890512
ZNF804A	protein_coding	-0.75697	9.9806e-05	0.00890512
CXCR6	protein_coding	-0.874569	0.00010025	0.00893059
AL138737.1	long_non_coding	1.21062	0.000100782	0.00896392
AC008937.2	long_non_coding	1.59601	0.000100969	0.00896641
PNMT	protein_coding	0.949235	0.000101172	0.00897032
POLR3DP1	pseudogene	2.16879	0.000101659	0.00898116
AP004289.1	pseudogene	2.39088	0.000101938	0.00898116
AC060773.1	pseudogene	2.33218	0.000101682	0.00898116
AP003467.2	pseudogene	2.02849	0.000102089	0.00898116
AC091078.1	long_non_coding	-1.08129	0.000101829	0.00898116
VCX	protein_coding	-2.32319	0.000102443	0.00899822
HLA-DRA	protein_coding	-0.768576	0.000102602	0.00899822
AC117834.1	long_non_coding	1.32128	0.000103021	0.00900703
SEZ6	protein_coding	1.21403	0.000103198	0.00900852
CACNB1	protein_coding	0.638691	0.000103493	0.00902038
ARMC12	protein_coding	-0.695137	0.000104421	0.00908723
INHBB	protein_coding	0.988052	0.000104972	0.0091211
APOBEC3A	protein_coding	-1.10601	0.000105389	0.00914324
OSR2	protein_coding	0.95537	0.000105618	0.00914905
XCL1	protein_coding	-0.845432	0.000106455	0.0091671
AZGP1	protein_coding	1.229	0.000106783	0.0091671
SNORA80E	ncRNA	1.18334	0.000106009	0.0091671
AL078459.1	long_non_coding	0.797408	0.0001068	0.0091671
AC106707.2	pseudogene	2.42756	0.000106676	0.0091671
AC010533.1	TEC	1.20731	0.000106673	0.0091671
CYP4F12	protein_coding	-1.30404	0.000107162	0.00918193
RNF39	protein_coding	0.74896	0.00010746	0.00918193
CCL23	protein_coding	-0.7784	0.000107302	0.00918193
KLK4	protein_coding	1.06295	0.000108885	0.00928962
AC022973.3	long_non_coding	1.32746	0.000110093	0.00937853
AC004000.1	long_non_coding	1.06312	0.000110615	0.00940878
TCAP	protein_coding	0.669194	0.000110912	0.00941981
AC004160.1	long_non_coding	0.834929	0.00011116	0.00942676
AP005131.5	long_non_coding	1.6208	0.00011232	0.00951086
OPCML	protein_coding	1.14672	0.000112524	0.00951386
LINC01448	long_non_coding	-1.97193	0.000113201	0.00955679
ZNF90P1	pseudogene	1.44137	0.000113874	0.00959922
LRP1-AS	long_non_coding	1.28113	0.0001145	0.00963766
SYNPO2	protein_coding	-0.878256	0.000114748	0.00964411
KCNAB3	protein_coding	0.684141	0.000115107	0.00965994
GLUD2	protein_coding	-0.625754	0.000116777	0.009771
AP000462.1	long_non_coding	2.82543	0.000116674	0.009771
AC016735.1	long_non_coding	1.12361	0.000117394	0.00980811
SLC39A8	protein_coding	-0.60836	0.000118171	0.00982939
GPR52	protein_coding	1.53382	0.000118064	0.00982939
AL360219.1	long_non_coding	0.939966	0.000118155	0.00982939
MIR4300HG	long_non_coding	-1.38949	0.000119857	0.0099445
AC016065.2	pseudogene	2.15331	0.000119907	0.0099445
MPIG6B	protein_coding	0.773385	0.000121347	0.0100492
AL162274.1	long_non_coding	0.832621	0.000121692	0.010063
MIR374B	ncRNA	1.55984	0.000122545	0.0101187
LIPM	protein_coding	-0.857461	0.000122765	0.0101221
RN7SKP255	ncRNA	4.55366	0.000123307	0.010152
TMTC2	protein_coding	-0.656113	0.000123736	0.0101725
AC005544.1	long_non_coding	1.45026	0.000125985	0.0103273
PRSS33	protein_coding	1.6747	0.000126195	0.0103293
AC138951.1	pseudogene	1.20845	0.000126551	0.0103293
NOTCH2NL	protein_coding	0.791961	0.000126876	0.0103403
AL671986.1	pseudogene	0.818792	0.000127692	0.0103471
RN7SL285P	ncRNA	2.56697	0.000127511	0.0103471
AP000487.2	long_non_coding	1.3948	0.000127454	0.0103471
AC027237.4	long_non_coding	0.88918	0.000127684	0.0103471
FBXL16	protein_coding	0.936938	0.000129475	0.0104318
RNU1-106P	ncRNA	0.748781	0.000129476	0.0104318
POT1-AS1	long_non_coding	0.688622	0.000129187	0.0104318
CCL17	protein_coding	-0.916399	0.000129982	0.0104498
AC025211.1	long_non_coding	2.61524	0.00013007	0.0104498
AC107072.2	long_non_coding	1.16117	0.000130387	0.0104604
NUTM2B	protein_coding	0.840557	0.000131567	0.0105252
AC012103.1	long_non_coding	-3.28242	0.000131924	0.0105388
AC092139.3	TEC	2.3005	0.000132592	0.0105772
EPB41L4A-AS2	long_non_coding	0.651444	0.000133116	0.0106041
PPP1R1A	protein_coding	1.22514	0.000133617	0.010629
PTAFR	protein_coding	-0.668973	0.000134043	0.0106479
SNORA77	ncRNA	0.87126	0.000135471	0.0107461
LAG3	protein_coding	-0.954731	0.000136746	0.0108321
LAMP3	protein_coding	-0.872934	0.000137928	0.0108774
RS1	protein_coding	0.883298	0.000138282	0.0108774
EGFR-AS1	long_non_coding	1.22274	0.000138226	0.0108774
RPS15AP10	pseudogene	0.658945	0.000137605	0.0108774
AC141930.2	long_non_coding	1.0966	0.000137992	0.0108774
DUTP7	pseudogene	1.97079	0.000138779	0.0109014
OR52N2	protein_coding	-1.46594	0.000139576	0.0109476
Metazoa_SRP	ncRNA	2.13364	0.000139755	0.0109476
AMTN	protein_coding	-1.57059	0.000140296	0.0109748
KLRC1	protein_coding	-1.00711	0.000142771	0.011044
DEFB1	protein_coding	1.30855	0.000141649	0.011044
CRACR2B	protein_coding	0.784967	0.000142897	0.011044
UBD	protein_coding	-1.2333	0.000142729	0.011044
AP000688.1	long_non_coding	0.683999	0.000141501	0.011044
Z99127.3	pseudogene	1.88224	0.000141996	0.011044
PSMC1P7	pseudogene	1.6142	0.000141863	0.011044
AC037198.2	long_non_coding	1.01906	0.000142941	0.011044
AL359697.1	long_non_coding	0.769511	0.000142432	0.011044
STX11	protein_coding	-0.641209	0.000143775	0.0110506
HERC5	protein_coding	-0.740969	0.000143792	0.0110506
AL162253.1	long_non_coding	1.7829	0.00014387	0.0110506
SCARNA3	ncRNA	2.44012	0.000144226	0.0110506
AC013553.1	pseudogene	1.93233	0.000144237	0.0110506
AC005726.4	long_non_coding	0.640057	0.000144396	0.0110506
ANKRD22	protein_coding	-0.821301	0.000146292	0.0111806
MAPK4	protein_coding	-1.20842	0.000146706	0.0111912
LIN7A	protein_coding	0.71596	0.000147397	0.0112195
ASCL1	protein_coding	-1.33382	0.000147973	0.0112481
RANBP20P	pseudogene	-1.59659	0.000148241	0.0112491
NKG7	protein_coding	-0.899257	0.000149033	0.0112777
SCGB1D2	protein_coding	1.48043	0.000149361	0.0112777
AL391419.1	pseudogene	1.60607	0.000149189	0.0112777
AC048380.3	TEC	2.06722	0.000149866	0.0113008
AL391280.1	pseudogene	0.777944	0.000151396	0.0114009
AC105339.2	long_non_coding	0.932884	0.00015256	0.0114733
AC114402.1	pseudogene	0.914565	0.000153378	0.0115042
LINC02416	long_non_coding	-0.834015	0.000153229	0.0115042
RPL12P11	pseudogene	1.3914	0.000154249	0.0115541
MOG	protein_coding	1.78028	0.000154688	0.0115717
AC097721.1	pseudogene	2.23862	0.000155048	0.0115833
MYO7B	protein_coding	0.943248	0.000156993	0.0117131
AC068481.1	long_non_coding	1.10419	0.000158491	0.0117782
AL136982.3	long_non_coding	1.89014	0.000158417	0.0117782
AL391422.3	long_non_coding	0.657037	0.00015837	0.0117782
AC008073.2	long_non_coding	0.902031	0.000158842	0.0117887
HNRNPA1P36	pseudogene	0.762168	0.0001593	0.0118
TMSB15B	protein_coding	0.611289	0.000159411	0.0118
LINC01894	long_non_coding	-1.00952	0.000160206	0.0118278
NUAK2	protein_coding	-0.629161	0.000161681	0.0118901
AC078962.1	long_non_coding	1.79033	0.000161615	0.0118901
RPL7P11	pseudogene	1.05986	0.000161622	0.0118901
AC008498.2	TEC	2.22109	0.000161982	0.0118967
AC116424.1	long_non_coding	1.57043	0.000162477	0.0119021
BATF2	protein_coding	-0.996758	0.000165348	0.012013
S100G	protein_coding	2.35165	0.000164703	0.012013
ABCG4	protein_coding	0.590419	0.000165246	0.012013
OR56A3	protein_coding	-2.7377	0.000165592	0.012013
SMCR5	long_non_coding	1.06698	0.000165764	0.012013
RSL24D1P8	pseudogene	1.2749	0.000165904	0.012013
HNRNPA1P62	pseudogene	1.3805	0.000165203	0.012013
AC096708.3	long_non_coding	1.88221	0.00016647	0.0120385
ENTHD1	protein_coding	0.847809	0.00016905	0.0122094
AL035706.1	long_non_coding	1.3373	0.000169766	0.0122455
LINC00987	long_non_coding	-0.966849	0.000170274	0.0122664
ADGRG2	protein_coding	1.21557	0.000170565	0.0122674
AL050343.2	long_non_coding	1.23097	0.000170721	0.0122674
AC092821.1	protein_coding	-1.17953	0.000173699	0.0124339
LINC01539	long_non_coding	-1.21599	0.000174537	0.0124781
ODAM	protein_coding	-1.985	0.000176142	0.0125112
PCDH9	protein_coding	-0.890522	0.000176619	0.0125112
FAM169A	protein_coding	-0.757283	0.000175405	0.0125112
CFAP45	protein_coding	0.619349	0.000176772	0.0125112
KIR2DS4	pseudogene	-1.31564	0.000175971	0.0125112
AP003062.1	long_non_coding	1.44367	0.000176688	0.0125112
AP000553.1	long_non_coding	0.732985	0.000176405	0.0125112
SPDYE5	protein_coding	0.674033	0.000178139	0.0125764
SLC26A5	protein_coding	0.905898	0.000179802	0.0125993
RPS5P2	pseudogene	1.19552	0.000179269	0.0125993
HLA-DQB2	protein_coding	-0.945925	0.000178805	0.0125993
AC104435.2	long_non_coding	-1.20335	0.000179439	0.0125993
MALAT1	long_non_coding	0.618667	0.00017968	0.0125993
RNU6-37P	ncRNA	1.05997	0.000180132	0.0126068
SCNN1G	protein_coding	0.988533	0.000181004	0.0126522
PLCL2	protein_coding	-0.671974	0.000182227	0.0127218
AC020661.3	long_non_coding	2.71681	0.000184667	0.0128604
CCL13	protein_coding	-1.02108	0.000186661	0.0129833
IL20RB-AS1	long_non_coding	1.75235	0.000187312	0.0130126
AC016405.3	long_non_coding	0.807445	0.000187626	0.0130183
LGR5	protein_coding	-1.46504	0.000188543	0.0130499
COX6B1P6	pseudogene	1.95261	0.000188378	0.0130499
RPL12P29	pseudogene	2.03119	0.000189002	0.0130657
THUMPD3P1	pseudogene	2.01087	0.000189397	0.013077
OAZ3	protein_coding	0.635944	0.000190412	0.0131279
MROH7	protein_coding	-0.799301	0.0001906	0.0131279
USP30-AS1	long_non_coding	-0.859334	0.000191209	0.0131539
CPNE9	protein_coding	0.822622	0.000191995	0.0131785
AC025180.1	long_non_coding	1.42485	0.000192267	0.0131785
AC073585.1	pseudogene	-0.691269	0.000192182	0.0131785
HLA-U	pseudogene	-0.800084	0.00019418	0.0132773
ANGPTL3	protein_coding	0.967067	0.000195419	0.0133459
AL354733.2	long_non_coding	0.920967	0.000196045	0.0133725
PROKR1	protein_coding	1.12264	0.000196742	0.0133733
GGN	protein_coding	0.744491	0.000196768	0.0133733
AC022919.1	TEC	1.78381	0.000196385	0.0133733
TNPO1P1	pseudogene	1.25366	0.000197455	0.0134039
NEK5	protein_coding	0.610502	0.000197809	0.0134118
SCGN	protein_coding	1.56412	0.00019886	0.0134355
CASP5	protein_coding	-0.876222	0.000198872	0.0134355
CA13	protein_coding	0.739018	0.000198548	0.0134355
COX6CP14	pseudogene	2.7395	0.000199778	0.0134682
RN7SL558P	ncRNA	1.21629	0.000199833	0.0134682
TAF7L	protein_coding	0.75861	0.000201126	0.0135392
AC016251.1	TEC	1.60784	0.000201539	0.0135509
TRAV12-2	TR	-0.926273	0.000202692	0.0135638
LINC02541	long_non_coding	-0.750329	0.000202631	0.0135638
LINC01871	long_non_coding	-0.891896	0.000202475	0.0135638
MIR5190	ncRNA	2.23575	0.000202018	0.0135638
AC133528.1	long_non_coding	0.812397	0.000203681	0.0135978
LINC01605	long_non_coding	0.744682	0.000204046	0.013606
KRT77	protein_coding	1.681	0.000205377	0.0136767
AC087359.1	pseudogene	1.14024	0.000205589	0.0136767
TNFRSF19	protein_coding	-0.855832	0.000205967	0.0136856
AC234772.2	long_non_coding	1.03234	0.000206532	0.0137071
CAMP	protein_coding	1.21131	0.000209683	0.0138511
CCDC36	protein_coding	0.708317	0.000209133	0.0138511
AC091799.1	pseudogene	0.711339	0.000209406	0.0138511
AC078925.4	TEC	-2.43049	0.000209445	0.0138511
AC011483.1	pseudogene	0.936172	0.000210211	0.0138536
RSPO1	protein_coding	1.17879	0.000211021	0.0138746
IGHV2-70	IG	-1.45349	0.000210939	0.0138746
AJ239322.1	long_non_coding	-2.09507	0.000213658	0.0140153
AC007490.1	TEC	1.46993	0.000214875	0.0140788
WFDC2	protein_coding	-1.24362	0.000215781	0.0141218
ZDHHC20P1	pseudogene	-0.798764	0.000216613	0.0141598
AC110994.1	pseudogene	2.09558	0.000216924	0.0141638
AL359764.1	long_non_coding	-1.58942	0.000217321	0.0141733
ADGRG7	protein_coding	1.90002	0.000217601	0.0141752
MACC1-AS1	long_non_coding	1.79653	0.000220109	0.014322
KRTAP5-AS1	long_non_coding	0.924352	0.000221096	0.0143697
AL137779.1	long_non_coding	0.987199	0.000223416	0.0145038
CD74	protein_coding	-0.697481	0.000224537	0.0145431
AC012618.2	pseudogene	0.846098	0.000224284	0.0145431
AL161757.2	long_non_coding	1.26172	0.000224923	0.0145515
LTF	protein_coding	-1.47809	0.000226328	0.0146089
RN7SL113P	ncRNA	0.810016	0.000226082	0.0146089
AC006012.1	long_non_coding	-0.694261	0.000226845	0.0146256
NTRK3	protein_coding	-1.23018	0.000227312	0.014639
KCNQ4	protein_coding	0.758317	0.000228107	0.0146734
AC132825.4	pseudogene	-1.91486	0.000229829	0.0147673
SNORD3B-1	ncRNA	1.38911	0.000231295	0.0148128
ALX4	protein_coding	-1.35519	0.000231821	0.0148279
MROH5	pseudogene	1.12179	0.000232498	0.0148389
AC011479.1	protein_coding	1.05447	0.000232519	0.0148389
AC093732.1	long_non_coding	1.39138	0.000233671	0.0148956
HBB	protein_coding	1.02226	0.000235041	0.014966
PP14571	long_non_coding	0.911801	0.000237706	0.0151154
LINC02446	long_non_coding	-1.1545	0.000237922	0.0151154
AL512326.1	pseudogene	1.57898	0.000238419	0.0151239
CCDC166	protein_coding	0.827952	0.000238592	0.0151239
PHLDA3	protein_coding	0.767385	0.000239329	0.0151291
AL356479.1	long_non_coding	1.4626	0.000239111	0.0151291
AL354919.2	long_non_coding	0.92998	0.000239476	0.0151291
KIR2DL4	protein_coding	-1.08342	0.000239959	0.0151426
AC007036.2	long_non_coding	1.36507	0.000240253	0.0151442
PLCE1-AS2	long_non_coding	1.96383	0.000242745	0.0152502
LONRF3	protein_coding	0.765415	0.000243984	0.0153111
PRDX3P4	pseudogene	2.27814	0.000246664	0.0154278
RN7SL382P	ncRNA	1.85756	0.000246621	0.0154278
SNORA74A	ncRNA	1.81157	0.000247023	0.015428
AC106827.1	pseudogene	2.9154	0.000247213	0.015428
AP005131.3	long_non_coding	1.12983	0.000248243	0.0154752
AC009093.2	long_non_coding	0.779081	0.000250724	0.0156126
CRYBA1	protein_coding	1.09806	0.000251085	0.0156179
FEZ1	protein_coding	0.673077	0.000251959	0.015655
KCNQ1OT1	long_non_coding	0.904303	0.000252337	0.0156612
TVP23CP1	pseudogene	2.6613	0.000253376	0.0156913
AL031666.3	long_non_coding	1.36339	0.000253325	0.0156913
AIRN	long_non_coding	1.92884	0.000254621	0.0157511
CD1A	protein_coding	-1.26668	0.000256886	0.0158738
AL078645.1	long_non_coding	2.35598	0.000258172	0.0159358
AL591845.1	long_non_coding	0.622505	0.000259897	0.0159736
AL121748.2	long_non_coding	0.96448	0.000259561	0.0159736
AC008894.3	TEC	0.671884	0.000259915	0.0159736
EEF1A2	protein_coding	1.40579	0.000261015	0.0160135
AC108751.4	long_non_coding	1.02258	0.000261132	0.0160135
HTR2C	protein_coding	-1.64026	0.000264756	0.0161814
AC022164.1	long_non_coding	1.13567	0.000265015	0.0161814
BCL2A1	protein_coding	-1.05773	0.000269292	0.016407
MRC2	protein_coding	0.627749	0.000270959	0.0164279
FBXO2	protein_coding	-1.01816	0.000271652	0.0164279
IL2RG	protein_coding	-0.788206	0.00027167	0.0164279
PDCD1	protein_coding	-0.921114	0.000271171	0.0164279
CLEC6A	protein_coding	-0.940323	0.000271218	0.0164279
KIF25-AS1	long_non_coding	-1.69415	0.000270743	0.0164279
AC006460.1	long_non_coding	1.00133	0.000274769	0.0165732
LINC02195	long_non_coding	-0.877135	0.000274953	0.0165732
ANKRD26P1	pseudogene	-1.24167	0.000276173	0.016629
AL357093.2	long_non_coding	1.22615	0.000276815	0.0166499
FAM20A	protein_coding	-0.754649	0.000279829	0.0168132
LINC00518	long_non_coding	1.24851	0.000280915	0.0168564
Z83843.1	long_non_coding	0.650916	0.000281144	0.0168564
ANKRD61	protein_coding	0.60018	0.000281851	0.0168809
GUCY1A2	protein_coding	0.782661	0.000283835	0.0169637
AC046158.1	long_non_coding	1.92395	0.000284272	0.0169719
AC009268.1	pseudogene	2.2123	0.000287204	0.0171288
MIR548O	ncRNA	2.21018	0.000288871	0.01721
AL161742.1	pseudogene	1.18043	0.000291689	0.0173597
IL12RB1	protein_coding	-0.777982	0.000292733	0.0174034
AC092620.2	long_non_coding	1.62241	0.000293984	0.0174411
AC013652.1	long_non_coding	0.895556	0.000296122	0.0175311
AC092903.2	long_non_coding	0.662764	0.000299927	0.0177378
AC087501.3	long_non_coding	1.83556	0.000301988	0.017841
LINC02544	long_non_coding	0.875836	0.000302968	0.0178802
ADAMTSL4	protein_coding	0.785322	0.000303496	0.0178926
AC023598.1	pseudogene	0.965372	0.00030447	0.0179314
ACTL6B	protein_coding	1.31299	0.000305433	0.0179372
AL513365.1	pseudogene	0.878399	0.00030649	0.0179753
HLA-DRB6	pseudogene	-0.810356	0.000306828	0.0179765
HSPE1P13	pseudogene	2.24351	0.000307588	0.0180024
CA6	protein_coding	1.4517	0.000307908	0.0180024
AC016251.2	TEC	1.88441	0.00030839	0.018012
ISPD-AS1	long_non_coding	0.953766	0.000309214	0.0180414
CR589904.1	pseudogene	-2.37062	0.000313233	0.0182571
AC103691.2	long_non_coding	1.10604	0.0003143	0.0182996
RNU4-25P	ncRNA	1.30332	0.000316046	0.0183642
AL355852.1	pseudogene	1.54502	0.000316908	0.0183821
AL022313.4	long_non_coding	-3.33417	0.000317005	0.0183821
ZNF683	protein_coding	-0.943637	0.000317475	0.0183904
AL356481.2	long_non_coding	1.46449	0.000318429	0.0184268
LINC02343	long_non_coding	1.39799	0.000321656	0.0185945
VPS26BP1	pseudogene	2.92091	0.000324766	0.0187366
AC092338.2	long_non_coding	0.883299	0.000324778	0.0187366
RAD51AP1P1	pseudogene	2.46454	0.000326123	0.0187758
AP001442.1	long_non_coding	0.994583	0.000327092	0.0188125
AC016734.2	TEC	2.01452	0.000327449	0.0188138
CNDP1	protein_coding	-0.778322	0.000330989	0.0189786
PCDHA8	protein_coding	0.98947	0.000330663	0.0189786
CILP2	protein_coding	0.832692	0.000333981	0.0191307
SFTA2	protein_coding	1.31689	0.000334817	0.0191517
AC131233.1	pseudogene	-1.54843	0.000335269	0.0191517
RNU6-437P	ncRNA	1.7849	0.000336835	0.0192163
CYP4A11	protein_coding	1.34081	0.000338085	0.0192293
RNF212B	protein_coding	0.706661	0.000337765	0.0192293
AC108215.1	TEC	1.08623	0.000338636	0.0192413
TEDDM1	protein_coding	0.801716	0.000340171	0.0192907
AL109614.1	long_non_coding	0.757283	0.000340189	0.0192907
LINC00160	long_non_coding	1.02447	0.000341246	0.0193118
AL158211.4	long_non_coding	0.92209	0.000341609	0.019313
AC078950.1	long_non_coding	1.87384	0.000343394	0.0193946
AC073052.1	pseudogene	0.823745	0.000344107	0.0194154
HIGD1C	protein_coding	1.4901	0.000345048	0.0194491
CAMK2B	protein_coding	0.905931	0.000346617	0.019518
HMGB2P1	pseudogene	-0.715946	0.000349881	0.0196822
UFL1-AS1	long_non_coding	0.817962	0.000352138	0.0197895
RCC2P4	pseudogene	2.00269	0.000353359	0.0198383
AL031009.1	TEC	0.821864	0.000354288	0.0198707
HIGD1AP16	pseudogene	1.77224	0.000355455	0.0199024
AC087385.1	pseudogene	1.13115	0.000356154	0.0199161
APOBEC3H	protein_coding	-0.755762	0.000356534	0.0199176
IGLV3-19	IG	-1.29937	0.000357715	0.0199638
RN7SL5P	ncRNA	1.02429	0.000359561	0.0200273
BNIP3P33	pseudogene	1.33224	0.000359942	0.0200287
AF131215.2	long_non_coding	1.73924	0.000360384	0.0200336
MUC7	protein_coding	-1.79585	0.00036191	0.0200986
AL161908.1	long_non_coding	0.974417	0.000362802	0.0201284
SLA2	protein_coding	-0.798822	0.000369169	0.0202648
PRICKLE1	protein_coding	0.601493	0.00036817	0.0202648
IGLC7	IG	-1.3031	0.000369479	0.0202648
IGHG4	IG	-1.21799	0.000368709	0.0202648
AC011742.3	pseudogene	1.06873	0.000366703	0.0202648
AC119744.1	pseudogene	1.28722	0.000369513	0.0202648
AC103876.1	long_non_coding	1.68527	0.000369566	0.0202648
LINC01351	long_non_coding	1.74495	0.000370775	0.0203002
AL137074.1	pseudogene	2.07135	0.000372044	0.0203414
C10orf82	protein_coding	-1.3415	0.000372865	0.0203469
AC133065.2	long_non_coding	-0.608695	0.000372597	0.0203469
TSEN15P2	pseudogene	1.33326	0.000373983	0.0203882
CST7	protein_coding	-0.689881	0.000375018	0.0204238
MMP10	protein_coding	1.1371	0.000376442	0.0204238
AL035410.1	pseudogene	1.80731	0.000376044	0.0204238
FAHD2P1	pseudogene	-2.01528	0.000375728	0.0204238
AC090519.2	long_non_coding	1.72243	0.000376443	0.0204238
TRPC5	protein_coding	2.3509	0.000378834	0.0204357
ADORA1	protein_coding	0.89319	0.000378122	0.0204357
LINC01579	long_non_coding	-1.17943	0.000378753	0.0204357
AC090825.1	long_non_coding	-0.758271	0.000377079	0.0204357
AC004233.1	long_non_coding	0.784915	0.000377715	0.0204357
AC008267.7	TEC	1.31768	0.000377846	0.0204357
AC012613.2	long_non_coding	2.08871	0.00038012	0.0204855
ANKFN1	protein_coding	-1.15494	0.000381956	0.0205452
KLHDC7B	protein_coding	-1.23131	0.000383915	0.0206114
AC005072.1	long_non_coding	1.32413	0.000383644	0.0206114
AC113143.1	long_non_coding	1.08837	0.000385458	0.0206745
CCL8	protein_coding	-0.875925	0.000387878	0.0207837
SSTR2	protein_coding	-0.702286	0.00038823	0.0207837
GNLY	protein_coding	-0.909544	0.000389232	0.0207979
AC005972.1	long_non_coding	1.82589	0.000390112	0.0208253
SAGE1	protein_coding	-1.7244	0.000392232	0.020899
NEAT1	long_non_coding	0.739591	0.000391911	0.020899
AC008026.3	long_non_coding	0.973595	0.000395422	0.0210292
EEF1A1P32	pseudogene	1.44293	0.000396167	0.0210293
ANKRD44-IT1	long_non_coding	1.22935	0.000400354	0.0211918
POU5F2	protein_coding	0.852448	0.000399672	0.0211918
AC104791.1	long_non_coding	1.39154	0.000400037	0.0211918
MLC1	protein_coding	1.5014	0.000401436	0.0212092
HNRNPA1P68	pseudogene	1.04426	0.000401324	0.0212092
EIF2S2P5	pseudogene	2.36653	0.000402485	0.0212448
PAGE5	protein_coding	-1.68555	0.000404946	0.0213348
PTPRN	protein_coding	0.943245	0.000408824	0.0215191
SRGAP3-AS2	long_non_coding	1.84839	0.000409767	0.0215286
AC092902.2	long_non_coding	0.719615	0.000409689	0.0215286
AC007216.3	long_non_coding	0.769605	0.000410343	0.0215375
AC020910.6	TEC	1.42099	0.000412601	0.0216172
LINC00102	long_non_coding	1.53216	0.000414206	0.0216455
AC092168.2	long_non_coding	1.18227	0.000414291	0.0216455
LINC02076	long_non_coding	0.85526	0.000415276	0.0216769
AC007161.1	pseudogene	1.26449	0.000416199	0.021705
MCHR1	protein_coding	0.769492	0.000419352	0.0218307
TMEM75	TEC	0.925942	0.000419735	0.0218307
FTHL17	protein_coding	-2.87383	0.000422789	0.0219675
RPL26P29	pseudogene	1.043	0.000423687	0.0219781
AC007622.2	long_non_coding	0.646289	0.000424159	0.0219781
RPL23AP50	pseudogene	1.68383	0.000425547	0.0220096
DLEU2L	long_non_coding	0.676303	0.000426099	0.022018
AP001994.1	pseudogene	-1.01581	0.000427398	0.0220649
LINC00862	long_non_coding	0.940835	0.000429095	0.0221207
TRAV24	TR	-0.888148	0.000429262	0.0221207
FAM163B	protein_coding	-1.2982	0.000431081	0.0221797
AC011473.4	protein_coding	1.62904	0.000431193	0.0221797
EVA1B	protein_coding	0.628609	0.000431784	0.0221899
RPL23AP95	pseudogene	0.916485	0.000432623	0.0222128
SMIM31	protein_coding	1.80768	0.000435451	0.0223378
KCND3	protein_coding	-0.897284	0.000436013	0.0223463
TMEM52B	protein_coding	-0.666585	0.000438967	0.0224041
ASCL2	protein_coding	0.859	0.000439521	0.0224041
CPEB1	protein_coding	0.838295	0.000437985	0.0224041
EEF1GP4	pseudogene	1.14218	0.000439477	0.0224041
AC005757.1	long_non_coding	1.6606	0.000437907	0.0224041
AP001172.1	long_non_coding	1.09728	0.000440349	0.022426
AC026782.2	long_non_coding	1.51447	0.000442756	0.022508
SLC4A8	protein_coding	0.695069	0.000443867	0.0225442
AC055811.4	TEC	0.677384	0.000444998	0.0225814
LINC01592	long_non_coding	1.23682	0.00044689	0.0226367
CTAG2	protein_coding	-2.9677	0.000447814	0.0226632
BCAS1	protein_coding	0.950488	0.000448862	0.0226756
AP003108.4	TEC	1.19282	0.000448849	0.0226756
MIR553	ncRNA	1.14833	0.0004546	0.0229244
AC015883.1	TEC	0.967132	0.000455534	0.022951
SRPK3	protein_coding	0.80368	0.000457137	0.0229776
AL450226.1	long_non_coding	2.47681	0.000457689	0.0229776
AL451074.4	pseudogene	1.18042	0.000457397	0.0229776
CHODL-AS1	long_non_coding	1.0879	0.000456734	0.0229776
AC107909.1	long_non_coding	2.11735	0.000460945	0.0231
HOXD13	protein_coding	-1.4426	0.000461515	0.0231081
BICDL2	protein_coding	0.635616	0.000464727	0.0231339
ARMC4	protein_coding	-1.02852	0.000464499	0.0231339
HLA-DQA1	protein_coding	-0.759267	0.000464898	0.0231339
SNORA37	ncRNA	2.27325	0.000464103	0.0231339
PRICKLE2-AS3	long_non_coding	1.66269	0.00046409	0.0231339
SETP10	pseudogene	2.09724	0.000464184	0.0231339
AC015908.2	long_non_coding	1.10807	0.000462817	0.0231339
GDA	protein_coding	-1.26398	0.000465929	0.0231444
AC005517.2	pseudogene	0.796227	0.000465688	0.0231444
PTGS1	protein_coding	-0.651816	0.00046758	0.0231658
KCNC3	protein_coding	0.737769	0.000467138	0.0231658
NCR1	protein_coding	-0.812718	0.000467589	0.0231658
SRGN	protein_coding	-0.604215	0.000474365	0.0234362
AL157392.4	long_non_coding	0.746953	0.000474707	0.0234362
GSTM5	protein_coding	0.77403	0.000477606	0.0235587
SYNGR4	protein_coding	0.747701	0.000478266	0.0235707
RN7SL306P	ncRNA	1.99036	0.000480591	0.0236646
AL589765.5	long_non_coding	0.613778	0.000482606	0.0237224
AL158163.1	long_non_coding	0.711446	0.000482254	0.0237224
LINC02560	long_non_coding	0.877347	0.000483794	0.0237602
AC134312.5	long_non_coding	0.784671	0.000485826	0.0238392
ATP5F1P1	pseudogene	2.30479	0.000487079	0.02388
AL121580.1	long_non_coding	1.53884	0.000487562	0.0238829
AC008063.1	long_non_coding	1.18867	0.00048802	0.0238847
RTL1	protein_coding	1.98156	0.000490264	0.0239737
AC110813.1	long_non_coding	3.10752	0.000491666	0.02398
AC110603.1	long_non_coding	2.45218	0.000490868	0.02398
RPS24P12	pseudogene	1.07668	0.000496108	0.0241757
IL13	protein_coding	-0.886579	0.000497766	0.0242132
PSMC1P5	pseudogene	1.23386	0.000498162	0.0242132
CLCN4	protein_coding	-0.591172	0.000501388	0.0243281
PTK6	protein_coding	0.88454	0.000500971	0.0243281
FPR2	protein_coding	-0.797251	0.000501901	0.0243321
AL157838.1	long_non_coding	0.678624	0.000504034	0.0243936
HIGD1AP14	pseudogene	1.19261	0.000503865	0.0243936
TLR8	protein_coding	-0.829811	0.000505808	0.0244238
PDE4D	protein_coding	-0.745082	0.000505955	0.0244238
SERPINB2	protein_coding	1.44078	0.000505847	0.0244238
AL021578.1	long_non_coding	0.670636	0.000509324	0.0245654
AKT3-IT1	long_non_coding	1.44567	0.00051071	0.0246113
SH2D1B	protein_coding	-0.777074	0.00051209	0.0246567
TF	protein_coding	-1.24318	0.00051591	0.0248158
AL391335.1	long_non_coding	1.21784	0.000516273	0.0248158
FDCSP	protein_coding	-1.70506	0.000516915	0.0248255
HIST1H1A	protein_coding	1.20836	0.000519764	0.0248989
AC055733.3	pseudogene	2.46829	0.000519633	0.0248989
VIPR1	protein_coding	0.696718	0.000522183	0.0249935
YWHAQP6	pseudogene	0.965061	0.000522664	0.0249954
ZNF469	protein_coding	0.692272	0.000523422	0.0250105
ITGAM	protein_coding	-0.58793	0.00052517	0.0250728
DUXAP7	pseudogene	1.84079	0.000526766	0.0251277
SEPHS1P1	pseudogene	0.831791	0.000530136	0.0252033
MAL2	long_non_coding	0.777683	0.000529983	0.0252033
AC079915.1	long_non_coding	1.19246	0.000529989	0.0252033
AL031667.2	pseudogene	1.52752	0.000532201	0.0252802
PTTG3P	pseudogene	1.47422	0.000533308	0.0253115
RPL7L1P12	pseudogene	2.10813	0.000534141	0.0253298
GAS2	protein_coding	-0.902552	0.000535785	0.0253864
AC004943.1	long_non_coding	0.746888	0.000537702	0.0254379
AC008443.7	pseudogene	-0.965009	0.000537772	0.0254379
RN7SL233P	ncRNA	1.0688	0.00053911	0.0254798
GBP5	protein_coding	-0.997781	0.000540352	0.0254876
AC004908.3	long_non_coding	0.600248	0.00054027	0.0254876
AL136164.3	TEC	0.946663	0.000540627	0.0254876
NTM	protein_coding	0.679413	0.000542129	0.0255158
MIR320C1	ncRNA	1.89809	0.000544476	0.0256049
AC006461.1	pseudogene	2.44716	0.000548297	0.0257631
ADRB1	protein_coding	-1.02738	0.000550769	0.0258577
AC079601.2	pseudogene	0.667165	0.000552094	0.0258984
HLA-DMA	protein_coding	-0.604166	0.000552725	0.0259065
IL19	protein_coding	1.19191	0.000554539	0.0259485
HIST1H4F	protein_coding	1.59477	0.000554337	0.0259485
HTR1DP1	pseudogene	1.45875	0.000555501	0.0259667
HIST1H2BI	protein_coding	1.22981	0.000555848	0.0259667
HNRNPA3P15	pseudogene	1.56932	0.000558361	0.0260625
GPR25	protein_coding	-0.952111	0.000559891	0.0260766
AC243571.2	long_non_coding	1.1041	0.000560047	0.0260766
TAF9BP1	pseudogene	1.60007	0.000560949	0.0260806
AC019294.3	pseudogene	-0.868141	0.000561056	0.0260806
AC026725.1	long_non_coding	1.92268	0.000561533	0.0260813
WWTR1-IT1	long_non_coding	0.793849	0.000564961	0.0261544
KIRREL2	protein_coding	-1.06977	0.000568361	0.0262548
IL31RA	protein_coding	-0.888675	0.000569038	0.0262548
RN7SL277P	ncRNA	1.71966	0.000568297	0.0262548
AP002993.1	long_non_coding	1.85907	0.000569454	0.0262548
AC106865.1	pseudogene	-0.747161	0.000572239	0.0263617
SNORA14A	ncRNA	1.29764	0.000575276	0.0264585
NPM1P30	pseudogene	1.70779	0.000575083	0.0264585
FCER1A	protein_coding	-0.908476	0.000576761	0.0264621
AC080188.2	long_non_coding	1.03036	0.000576022	0.0264621
AC104083.1	long_non_coding	0.621207	0.000578479	0.0265194
TPO	protein_coding	0.83664	0.000580797	0.0266041
DLG3-AS1	long_non_coding	0.805619	0.000582494	0.0266602
GDPD2	protein_coding	1.06113	0.000583193	0.0266706
ERVFRD-1	protein_coding	0.815039	0.000584875	0.0267259
RNU7-40P	ncRNA	0.842082	0.000587536	0.0268257
AC009054.1	long_non_coding	1.7361	0.000588537	0.0268497
AKR7A3	protein_coding	0.654905	0.00059253	0.0269449
AC020659.1	long_non_coding	0.975244	0.000592135	0.0269449
AL160281.1	pseudogene	2.06002	0.000592527	0.0269449
CD8B2	pseudogene	-1.16902	0.000594801	0.0270046
C12orf54	protein_coding	0.755892	0.000596736	0.0270707
RAB19	protein_coding	-0.646242	0.000601512	0.0272436
RPL18AP2	pseudogene	1.09996	0.000603933	0.0273095
AC148476.1	long_non_coding	0.928793	0.000603698	0.0273095
AL096803.3	long_non_coding	1.19091	0.00060688	0.0274208
XAGE3	protein_coding	-1.98518	0.000609192	0.0274423
LINC01105	long_non_coding	1.28649	0.000610757	0.0274423
AL731563.1	pseudogene	1.76065	0.000608233	0.0274423
AC027288.1	long_non_coding	1.29374	0.000610335	0.0274423
AC009065.6	long_non_coding	1.23446	0.000608446	0.0274423
KLK6	protein_coding	1.28695	0.000613112	0.027522
AC105429.1	long_non_coding	0.746153	0.000613506	0.027522
RBM11	protein_coding	-0.919724	0.00061585	0.0276052
AC008379.1	pseudogene	1.70843	0.000618699	0.027711
AC019227.1	pseudogene	1.4936	0.000619981	0.0277373
AC103740.2	long_non_coding	1.08265	0.000620269	0.0277373
THEM5	protein_coding	0.739047	0.000621725	0.0277804
AL603840.1	long_non_coding	-0.910748	0.000626572	0.0279307
PIGR	protein_coding	-1.39718	0.000629815	0.0280531
SGO1-AS1	long_non_coding	1.83584	0.000630341	0.0280544
LINC01118	long_non_coding	0.866784	0.000633884	0.0281677
RNA5SP159	ncRNA	2.18841	0.000633695	0.0281677
AC091059.2	TEC	2.1351	0.000634503	0.028173
TAS2R13	protein_coding	1.36477	0.000638684	0.0283364
AC036176.3	long_non_coding	1.21949	0.000641182	0.0283803
PCDHGA7	protein_coding	0.770041	0.000643403	0.0284563
CYP4Z2P	pseudogene	1.27646	0.000644753	0.0284715
UBE2QL1	protein_coding	-0.755444	0.000644274	0.0284715
AL670729.1	long_non_coding	0.630094	0.000648706	0.028579
AC006141.1	long_non_coding	1.16435	0.000648339	0.028579
BIN1	protein_coding	-0.607333	0.000649264	0.0285813
B3GALT1	protein_coding	-0.974884	0.000651989	0.0286166
AL035658.1	long_non_coding	1.1491	0.000651124	0.0286166
AP003354.1	long_non_coding	0.924886	0.000652412	0.0286166
AC022826.1	pseudogene	1.75824	0.000653786	0.0286464
RBM20	protein_coding	0.875272	0.000656072	0.0287243
SLC7A13	protein_coding	1.88148	0.000660985	0.0288307
AC032044.1	long_non_coding	0.726347	0.000660994	0.0288307
AC022001.3	long_non_coding	1.40556	0.00066016	0.0288307
AC008895.1	TEC	0.61623	0.000661056	0.0288307
AC012618.3	pseudogene	0.689144	0.000662372	0.0288436
AC018529.1	long_non_coding	0.961227	0.000662373	0.0288436
AC026362.2	TEC	0.820718	0.000666715	0.028988
SAMD9L	protein_coding	-0.711689	0.000668274	0.0290111
KIF12	protein_coding	0.706973	0.000675477	0.0293013
UBE2L4	pseudogene	0.81874	0.000676578	0.0293265
NWD2	protein_coding	-1.27086	0.000681019	0.0294512
AL512430.2	pseudogene	2.53194	0.000680356	0.0294512
BNIP3P42	pseudogene	1.5255	0.000680869	0.0294512
AC092839.1	long_non_coding	1.55296	0.000682744	0.029485
RN7SL665P	ncRNA	1.93726	0.000682846	0.029485
GDAP1L1	protein_coding	1.07453	0.000684966	0.0295038
TAGLN	protein_coding	0.740717	0.00068595	0.0295038
ODF3L2	protein_coding	0.992469	0.000686583	0.0295038
HIST1H4C	protein_coding	0.836967	0.000686593	0.0295038
AC108673.2	long_non_coding	0.627833	0.000684887	0.0295038
AL022322.2	long_non_coding	0.663273	0.000686164	0.0295038
ATP5G1P6	pseudogene	1.10652	0.000688092	0.029531
TCTEX1D4	protein_coding	0.889373	0.00069018	0.0295981
SLC14A1	protein_coding	0.893218	0.000691435	0.02961
GSTM3	protein_coding	0.644854	0.000694027	0.0296281
PRR26	protein_coding	1.17193	0.000693022	0.0296281
ZNF385C	protein_coding	0.799184	0.000692911	0.0296281
NPM2	protein_coding	0.658292	0.000695765	0.0296733
AC073534.2	long_non_coding	0.704143	0.000696138	0.0296733
LINC01914	long_non_coding	-0.807987	0.000698347	0.029709
SCARNA15	ncRNA	0.944266	0.000698553	0.029709
HIST1H2BE	protein_coding	0.731476	0.00069796	0.029709
AP001505.2	long_non_coding	0.594151	0.000699428	0.0297238
RAB6B	protein_coding	0.597327	0.00070074	0.0297572
MYH16	pseudogene	0.763411	0.000703101	0.0297903
SLC45A3	protein_coding	0.589384	0.000702733	0.0297903
AC130456.2	long_non_coding	2.09109	0.000702347	0.0297903
SGIP1	protein_coding	0.654401	0.000705656	0.0298761
FREM1	protein_coding	-0.775077	0.000706588	0.0298932
TCF15	protein_coding	0.939977	0.000712	0.0299828
PSG9	protein_coding	1.81297	0.000712424	0.0299828
SDHDP2	pseudogene	1.16914	0.00071219	0.0299828
AL513343.1	pseudogene	1.23828	0.000711255	0.0299828
EPPK1	protein_coding	0.747473	0.000711982	0.0299828
AC096996.2	long_non_coding	1.84794	0.000709596	0.0299828
PLLP	protein_coding	0.619181	0.000713454	0.0300039
CDH22	protein_coding	1.13204	0.000714953	0.0300445
BX324167.2	long_non_coding	0.90079	0.000716076	0.0300693
RNU6-1310P	ncRNA	1.66456	0.000717579	0.0301101
AC073592.7	TEC	1.46892	0.000719216	0.030134
LCP1	protein_coding	-0.605992	0.000722007	0.0302285
AC073283.1	long_non_coding	0.94617	0.0007253	0.0302766
RN7SL160P	ncRNA	1.20159	0.000725243	0.0302766
DPRXP4	pseudogene	0.68653	0.000724972	0.0302766
SNHG22	long_non_coding	0.633731	0.000724084	0.0302766
EEF1B2P1	pseudogene	0.988778	0.000728127	0.0303442
RPL31P61	pseudogene	0.697389	0.000727936	0.0303442
HNRNPA1P50	pseudogene	0.780923	0.000728531	0.0303442
SHC2	protein_coding	0.741673	0.000730015	0.0303836
ABCC2	protein_coding	0.807323	0.000732095	0.0304275
AC002044.3	TEC	1.64766	0.000732149	0.0304275
AP004290.1	pseudogene	1.31104	0.000733735	0.0304487
AC023389.1	long_non_coding	1.04221	0.000733445	0.0304487
AC027117.1	long_non_coding	0.891033	0.000736493	0.0305407
TRBV6-5	TR	-0.83728	0.000737071	0.0305422
RNU1-67P	ncRNA	1.08426	0.0007382	0.0305442
C2CD4D	protein_coding	0.602975	0.000737864	0.0305442
ZBED2	protein_coding	-0.838317	0.000741387	0.0306311
AC090971.4	pseudogene	1.54251	0.000741346	0.0306311
CALB2	protein_coding	1.07202	0.000742469	0.0306535
ZG16B	protein_coding	1.16107	0.000744229	0.0307036
RNF152	protein_coding	0.754537	0.000745855	0.0307483
IRF1	protein_coding	-0.589015	0.000748629	0.0307855
HBA2	protein_coding	0.962887	0.000750029	0.0307855
EXOC3L4	protein_coding	-1.04083	0.00074801	0.0307855
AC104164.2	pseudogene	1.87837	0.000749878	0.0307855
VDAC1P4	pseudogene	1.44732	0.00074935	0.0307855
AC012370.1	long_non_coding	1.64078	0.000751186	0.0308106
KCNJ10	protein_coding	-0.841583	0.000753848	0.0308954
AC093523.1	long_non_coding	-1.23972	0.000754347	0.0308954
FAAH2	protein_coding	-0.642571	0.000758124	0.0309827
AC012066.1	pseudogene	0.83724	0.00075973	0.0310156
FP325331.1	TEC	1.03003	0.000760028	0.0310156
SNORA31	ncRNA	0.713425	0.000763869	0.0311499
AC068888.2	long_non_coding	0.829753	0.00076629	0.031226
DDX60	protein_coding	-0.634786	0.000766909	0.0312288
PRKAR1AP1	pseudogene	1.58166	0.000773615	0.0314564
JMJD1C-AS1	long_non_coding	0.745496	0.000776591	0.0315321
FP325332.1	long_non_coding	0.864251	0.000777782	0.0315577
AL137025.1	long_non_coding	0.961256	0.000779271	0.0315732
AC093908.1	TEC	0.772037	0.000779282	0.0315732
AC017100.1	long_non_coding	-0.601516	0.000782345	0.0316746
CLRN1-AS1	long_non_coding	-0.865578	0.000784402	0.0317351
CCNB2P1	pseudogene	1.82422	0.000785252	0.0317468
TIMM9P2	pseudogene	1.10533	0.000788061	0.0318375
LINC02476	long_non_coding	-3.3766	0.000789363	0.0318446
AL137782.1	long_non_coding	0.602356	0.000789209	0.0318446
SLC13A2	protein_coding	1.3674	0.000790745	0.0318776
DAZL	protein_coding	-0.898126	0.000795812	0.0320133
SLC27A2	protein_coding	-0.68826	0.000795354	0.0320133
TFAP2E	protein_coding	0.731534	0.000798036	0.0320343
CLDN8	protein_coding	0.995522	0.000801185	0.0320635
AL365223.1	pseudogene	1.34738	0.000801602	0.0320635
AL589765.4	long_non_coding	0.612064	0.000801118	0.0320635
AC034213.1	long_non_coding	-1.14229	0.00080032	0.0320635
AL049757.1	pseudogene	0.739144	0.000800172	0.0320635
LINC01671	long_non_coding	1.02987	0.000803406	0.0320902
IL26	protein_coding	-1.07283	0.000806476	0.032122
KLK10	protein_coding	1.22108	0.000805294	0.032122
SNORA80A	ncRNA	1.91827	0.000805438	0.032122
HIST1H2BM	protein_coding	0.996996	0.000806466	0.032122
FABP7	protein_coding	-1.32861	0.000807492	0.0321398
AC015799.1	TEC	0.716173	0.000808331	0.0321505
CDHR4	protein_coding	-0.911793	0.000811503	0.0322324
RPL21P8	pseudogene	1.38831	0.000813765	0.0322984
AC091230.1	long_non_coding	1.25365	0.000815802	0.0323565
AC121338.1	long_non_coding	1.0556	0.000818227	0.0324299
AL137786.1	long_non_coding	-1.04833	0.000818954	0.032436
PAX7	protein_coding	2.43559	0.000822605	0.032475
THEG	protein_coding	1.19066	0.000826365	0.032475
CNR1	protein_coding	-0.987985	0.00082338	0.032475
LMX1A	protein_coding	-1.18914	0.000827067	0.032475
GLIS1	protein_coding	0.871264	0.000825412	0.032475
AC112196.1	long_non_coding	2.28225	0.00082324	0.032475
SLED1	pseudogene	0.95251	0.000824092	0.032475
AC132192.1	long_non_coding	0.747776	0.000825303	0.032475
AC007938.3	long_non_coding	0.685819	0.000825416	0.032475
AC100803.3	long_non_coding	0.794629	0.000821282	0.032475
AL096712.1	pseudogene	1.27271	0.000827356	0.032475
DKK4	protein_coding	1.19587	0.000828658	0.0324787
AC008953.1	pseudogene	1.39554	0.000828236	0.0324787
AL356273.1	pseudogene	1.57457	0.000835295	0.0326482
AC091304.2	pseudogene	-1.51183	0.000834549	0.0326482
MRC1	protein_coding	-0.787542	0.00083524	0.0326482
AC005856.1	long_non_coding	1.17802	0.000835148	0.0326482
GFRA1	protein_coding	-1.08417	0.000839488	0.0326913
SMAD5-AS1	long_non_coding	0.805182	0.000841649	0.0326913
SHANK2-AS3	long_non_coding	1.55112	0.00083896	0.0326913
RGS7BP	protein_coding	-1.05736	0.000840535	0.0326913
TP53TG3D	protein_coding	-1.27158	0.000843746	0.0326913
OLIG2	protein_coding	1.17948	0.000845583	0.0326913
WEE2	protein_coding	0.773142	0.000840475	0.0326913
MIR1205	ncRNA	2.62815	0.000843244	0.0326913
UBE2D3P3	pseudogene	1.01289	0.000843785	0.0326913
AL121956.1	long_non_coding	1.29018	0.000845796	0.0326913
AC025754.1	long_non_coding	1.3112	0.000846294	0.0326913
RNU6ATAC39P	ncRNA	1.75118	0.000842944	0.0326913
AC105219.2	long_non_coding	0.794858	0.000846193	0.0326913
RAB44	protein_coding	0.64892	0.000837038	0.0326913
DPRXP5	pseudogene	1.8954	0.000846061	0.0326913
AL133492.1	long_non_coding	1.44214	0.000840288	0.0326913
AC005674.2	long_non_coding	0.629331	0.00084833	0.0327273
AC008985.1	TEC	1.12489	0.000855583	0.0329621
AC022336.3	TEC	1.05914	0.000858651	0.0330578
AC007598.1	long_non_coding	2.13833	0.000859892	0.033083
LSAMP	protein_coding	-0.982722	0.000862368	0.0331557
ZIC3	protein_coding	-1.70251	0.000866367	0.0332345
LINC02201	long_non_coding	0.927806	0.000866771	0.0332345
TLK2P2	pseudogene	0.793931	0.00087388	0.0334616
DPP4	protein_coding	0.719111	0.000879048	0.0335912
LIMS1-AS1	long_non_coding	0.762221	0.000878938	0.0335912
AC008083.2	pseudogene	-0.882275	0.000878322	0.0335912
SCN11A	protein_coding	-0.638032	0.000882385	0.0336959
AC024940.1	protein_coding	-1.1959	0.000888541	0.0338851
AC007161.2	pseudogene	2.12401	0.000890484	0.0339363
AC022400.2	long_non_coding	1.29852	0.000891534	0.0339534
AL365356.1	long_non_coding	0.996451	0.000893286	0.0339743
NPTX2	protein_coding	-0.942404	0.000894319	0.0339868
AC022211.1	long_non_coding	0.647018	0.000894816	0.0339868
AC012358.3	long_non_coding	0.642212	0.00089559	0.0339933
C1orf116	protein_coding	0.730971	0.000900247	0.0341471
AC132825.1	pseudogene	1.41133	0.000905256	0.0342911
AC024941.2	long_non_coding	-0.871761	0.000907634	0.0343581
LINC01343	long_non_coding	1.69581	0.000909507	0.0343599
ANKRD20A1	protein_coding	1.13634	0.000909149	0.0343599
AC073349.2	pseudogene	0.734186	0.000911994	0.0344078
MIR4677	ncRNA	0.872181	0.000911754	0.0344078
TYRP1	protein_coding	1.26754	0.000914818	0.0344913
AC087276.2	long_non_coding	0.803725	0.000916771	0.0345345
CHIA	protein_coding	1.21326	0.000920553	0.0346205
AC018926.3	long_non_coding	0.596789	0.000920696	0.0346205
IL23A	protein_coding	-0.623623	0.000923461	0.0346783
LINC01833	long_non_coding	1.08374	0.000923426	0.0346783
ARNT2	protein_coding	-0.729676	0.000926265	0.0347605
AL136018.1	long_non_coding	1.23336	0.000927326	0.0347772
RNA5SP317	ncRNA	0.833139	0.000930234	0.03484
CYCSP4	pseudogene	2.46212	0.000934473	0.03491
DPYS	protein_coding	-0.734592	0.000936933	0.0349518
AC007750.1	long_non_coding	0.717241	0.00093895	0.0350039
GJD4	protein_coding	0.972013	0.00094102	0.0350348
LINC01060	long_non_coding	0.769321	0.000941004	0.0350348
AC134407.2	TEC	0.790675	0.000941841	0.0350423
PCDH10	protein_coding	-1.08527	0.000946046	0.035101
SLC25A3P2	pseudogene	1.20964	0.000945828	0.035101
AC007494.1	pseudogene	1.21078	0.000946527	0.035101
AC011483.2	long_non_coding	1.09935	0.000944993	0.035101
DIP2A-IT1	long_non_coding	1.04842	0.000949847	0.0352011
RNU6-883P	ncRNA	0.965588	0.000952183	0.0352414
KRTAP17-1	protein_coding	1.71447	0.000955688	0.0353221
KLHL6-AS1	long_non_coding	1.84099	0.000956581	0.0353221
AC008700.1	long_non_coding	2.12283	0.000957214	0.0353221
AC064874.1	long_non_coding	2.65928	0.000959293	0.0353655
AC026894.1	long_non_coding	1.35552	0.000962057	0.0354443
FRMPD1	protein_coding	-0.782235	0.000963405	0.0354708
ST6GALNAC3	protein_coding	-0.628164	0.000966241	0.0354919
PCDHGB3	protein_coding	0.818367	0.000964807	0.0354919
AC110048.2	long_non_coding	0.793242	0.000965629	0.0354919
LINC01634	long_non_coding	1.15426	0.00096888	0.0355537
SLC25A39P1	pseudogene	1.14747	0.000970989	0.0355876
CD70	protein_coding	-0.773064	0.000972567	0.0356223
PAQR6	protein_coding	0.673954	0.000974445	0.035668
MPO	protein_coding	0.81477	0.000981052	0.0358401
NDST1-AS1	long_non_coding	0.769048	0.000980889	0.0358401
WT1-AS	long_non_coding	1.0109	0.000982979	0.0358641
AC107959.3	long_non_coding	-0.823076	0.000982676	0.0358641
AL592148.1	pseudogene	0.808845	0.000984826	0.0359083
TTC39A	protein_coding	0.639936	0.000986712	0.0359539
ESRG	long_non_coding	-1.81511	0.000991687	0.0360653
LMOD1	protein_coding	0.673187	0.000993763	0.0360712
ENOX1-AS1	long_non_coding	1.75548	0.000995325	0.0361047
RNF150	protein_coding	-0.778348	0.000998066	0.0361576
IL7	protein_coding	-0.646014	0.00100422	0.0362581
LMAN1L	protein_coding	1.32639	0.0010042	0.0362581
PLEKHA6	protein_coding	0.698292	0.00100533	0.0362581
TPRG1-AS1	long_non_coding	-0.658969	0.00100221	0.0362581
AC018410.1	long_non_coding	1.08247	0.00100168	0.0362581
AC021739.1	pseudogene	1.27444	0.00100368	0.0362581
AC005746.3	long_non_coding	1.65755	0.00100525	0.0362581
MMEL1	protein_coding	0.766886	0.00100806	0.0362879
AC008080.4	long_non_coding	1.14241	0.00101969	0.0366356
AKAP14	protein_coding	-1.22474	0.00102336	0.0367206
AL596325.2	long_non_coding	0.635872	0.00102311	0.0367206
MIR583HG	long_non_coding	0.846994	0.00102741	0.0367823
AC090115.3	pseudogene	0.989019	0.00102768	0.0367823
AL356423.1	pseudogene	1.62681	0.00102733	0.0367823
AC004448.4	long_non_coding	0.867413	0.00102921	0.036792
AL031428.1	long_non_coding	2.12675	0.00102926	0.036792
CLYBL-AS2	long_non_coding	1.39941	0.00103064	0.0368183
ADAMTS9-AS2	long_non_coding	0.702561	0.00103253	0.0368625
AL354890.1	pseudogene	1.31035	0.00103603	0.0369407
FAM205C	protein_coding	-1.03967	0.00104224	0.0370269
POU5F1P5	pseudogene	1.47628	0.00104246	0.0370269
C1QTNF1-AS1	long_non_coding	-0.851127	0.00104482	0.0370669
SYT16	protein_coding	0.968886	0.00104876	0.0371833
MIR4644	ncRNA	1.79297	0.00105124	0.0372478
AC064807.2	long_non_coding	0.864951	0.00105441	0.0373368
MMP15	protein_coding	0.712869	0.00105639	0.0373833
AL512506.1	long_non_coding	0.929757	0.00105854	0.037436
SPATA31A1	protein_coding	-2.08076	0.00106002	0.0374413
AC138932.5	long_non_coding	0.756145	0.00105974	0.0374413
AC073530.1	long_non_coding	1.85869	0.00106193	0.0374855
EIF4BP5	pseudogene	1.71362	0.0010644	0.0375256
AL589666.2	TEC	1.4533	0.00106392	0.0375256
HLA-DRB1	protein_coding	-0.642717	0.00106875	0.0376323
MTRNR2L12	protein_coding	0.740899	0.00106944	0.0376331
AL117372.1	long_non_coding	-2.43631	0.00107157	0.0376846
NKX6-1	protein_coding	0.804668	0.00107438	0.0377597
AC016542.3	TEC	2.87138	0.00108067	0.0379572
STMN2	protein_coding	0.996768	0.00108426	0.0379653
IL21-AS1	long_non_coding	-0.797131	0.00108403	0.0379653
AP006259.1	long_non_coding	2.30092	0.00108365	0.0379653
AL096817.1	TEC	1.26812	0.00108283	0.0379653
SYCN	protein_coding	1.73929	0.00108633	0.0379905
ERAS	protein_coding	0.772172	0.0010878	0.0379952
AP001626.1	long_non_coding	0.968383	0.00108891	0.0379952
AC087521.1	long_non_coding	0.690061	0.00108829	0.0379952
AC009948.5	TEC	1.19474	0.00108915	0.0379952
LINC02526	long_non_coding	1.01226	0.0010904	0.0380153
VGF	protein_coding	0.854595	0.00109357	0.0380788
AC244517.1	long_non_coding	0.826531	0.00109353	0.0380788
LARGE-AS1	long_non_coding	1.40802	0.0010952	0.0380884
LINC01705	long_non_coding	0.803469	0.00109671	0.0381175
AC011479.3	long_non_coding	0.824758	0.00110008	0.0382114
AC241377.3	TEC	-0.762749	0.0011051	0.038362
TNMD	protein_coding	-1.04013	0.00111447	0.0385452
RAD17P2	pseudogene	1.98967	0.00111418	0.0385452
CACNA1C-IT3	long_non_coding	2.13465	0.00111313	0.0385452
AL034374.2	long_non_coding	0.613606	0.0011133	0.0385452
RPL35AP25	pseudogene	2.24727	0.00111522	0.0385473
LRRC2	protein_coding	-0.614882	0.00111942	0.0386689
AC002543.1	pseudogene	1.13127	0.00112128	0.0387094
GLULP4	pseudogene	-0.758379	0.00112334	0.0387331
AC009119.1	long_non_coding	0.910102	0.0011228	0.0387331
AP005060.1	TEC	1.16839	0.00112641	0.0388156
RSU1P2	pseudogene	1.15212	0.00112771	0.0388156
IGKV1-9	IG	-1.14586	0.00112779	0.0388156
ALPP	protein_coding	-1.36106	0.00113182	0.0389277
AC010632.2	long_non_coding	1.08182	0.00113243	0.0389277
AC103988.1	pseudogene	1.50874	0.00113548	0.0389851
RPL13P6	pseudogene	1.07816	0.00113645	0.0389949
AC023389.2	pseudogene	1.36561	0.00113757	0.0390041
MACC1	protein_coding	0.671806	0.00114033	0.0390568
AC007342.1	long_non_coding	1.47756	0.00114213	0.0390948
TNFSF15	protein_coding	-0.651954	0.0011429	0.0390975
LINC00675	protein_coding	1.24263	0.00114483	0.0391398
TRAV6	TR	-0.757929	0.00114691	0.0391871
AL121790.2	long_non_coding	1.15438	0.00115217	0.0393194
AL359092.1	pseudogene	1.25212	0.0011529	0.0393205
CUBNP3	pseudogene	1.36849	0.00115708	0.0393915
AC018889.1	pseudogene	2.36069	0.00115656	0.0393915
GJC2	protein_coding	0.594923	0.00115866	0.0394215
PLET1	protein_coding	1.20778	0.00116403	0.0395664
LINC01050	long_non_coding	0.806066	0.00116431	0.0395664
NAALADL2-AS2	long_non_coding	1.3147	0.00116708	0.0396366
RNU4-22P	ncRNA	1.6767	0.00116913	0.0396822
EGF	protein_coding	0.996898	0.00117397	0.0397986
CXCL13	protein_coding	-0.988759	0.00117781	0.0398225
RPL31P58	pseudogene	1.55065	0.00117782	0.0398225
SNORA74D	ncRNA	1.61381	0.00117865	0.0398225
AC015849.4	long_non_coding	1.06217	0.00117961	0.0398225
AL133445.2	long_non_coding	0.808972	0.00118065	0.0398338
SYCE1	protein_coding	-1.17336	0.00118614	0.0398763
CTNNA3	protein_coding	-0.866001	0.00118602	0.0398763
AC003989.2	pseudogene	2.68343	0.00118332	0.0398763
AC008764.9	TEC	0.631424	0.00118513	0.0398763
AL024474.2	long_non_coding	2.28103	0.00118733	0.0398861
AP003467.1	long_non_coding	1.59723	0.00118785	0.0398861
GPX2	protein_coding	-1.11752	0.00118869	0.0398865
KCNMA1-AS1	long_non_coding	1.12369	0.00118927	0.0398865
TYR	protein_coding	1.64997	0.00119306	0.0399187
KRT4	protein_coding	1.51494	0.00119174	0.0399187
IGKV2D-40	IG	1.26071	0.00119208	0.0399187
AC011939.1	pseudogene	1.06501	0.00119248	0.0399187
UBASH3A	protein_coding	-0.698044	0.00119614	0.0399981
AP001999.1	long_non_coding	1.21077	0.00120156	0.0401557
SLC1A1	protein_coding	-0.739425	0.00120586	0.0402022
ACSS3	protein_coding	0.685788	0.00120723	0.0402022
RND1	protein_coding	0.733051	0.00120547	0.0402022
C19orf18	protein_coding	0.585139	0.00120597	0.0402022
SAMD9	protein_coding	-0.69039	0.00120619	0.0402022
PRH2	protein_coding	0.889478	0.00121105	0.0402498
CRABP2	protein_coding	0.888969	0.00121283	0.0402498
CIITA	protein_coding	-0.721383	0.00121436	0.0402498
AL139156.1	pseudogene	1.80605	0.00121108	0.0402498
AL158825.2	long_non_coding	0.625276	0.00121405	0.0402498
AC005899.1	long_non_coding	1.05038	0.00121289	0.0402498
AC127024.8	TEC	0.771841	0.00121257	0.0402498
DKKL1	protein_coding	0.615008	0.00121982	0.0404013
SUMO2P8	pseudogene	1.77135	0.00122036	0.0404013
ANAPC10P1	pseudogene	1.36249	0.00122206	0.0404198
AC093001.1	long_non_coding	1.38729	0.00122378	0.0404198
Z73965.1	TEC	0.680061	0.00122356	0.0404198
TEX12	protein_coding	0.662881	0.001228	0.0404512
GCOM2	pseudogene	-0.614854	0.00122831	0.0404512
LINC02432	long_non_coding	-1.35122	0.00122704	0.0404512
AC083841.1	long_non_coding	0.916767	0.00122698	0.0404512
AC023206.1	pseudogene	1.39321	0.0012265	0.0404512
CELF2	protein_coding	-0.605744	0.0012292	0.0404569
AC055811.3	long_non_coding	1.26001	0.00123009	0.0404627
LINC01615	long_non_coding	0.790356	0.00123393	0.0405464
AL031281.1	pseudogene	1.32487	0.00123407	0.0405464
AL163192.1	long_non_coding	1.7823	0.00123581	0.0405563
PCOLCE2	protein_coding	-0.871223	0.0012371	0.040575
TTC21B-AS1	long_non_coding	1.06246	0.00123852	0.0405979
ANKK1	protein_coding	-0.631512	0.00124402	0.0407545
AC108472.1	long_non_coding	1.02904	0.00124534	0.0407741
ZNF536	protein_coding	1.14143	0.00124659	0.0407914
AL603750.1	TEC	0.648697	0.00124747	0.0407967
AL161644.1	long_non_coding	2.03051	0.00126151	0.041208
BOLA2P3	pseudogene	0.835426	0.00127262	0.0415471
ANO1	protein_coding	0.617028	0.00128539	0.041853
PAGE2	protein_coding	-2.07622	0.00128754	0.0418888
RPS15AP9	pseudogene	1.22609	0.00129078	0.0418976
AC108676.1	long_non_coding	-1.07891	0.00129071	0.0418976
AC133065.1	long_non_coding	1.16798	0.00128925	0.0418976
MIR135A1	ncRNA	0.811947	0.00129599	0.0420186
SLCO1A2	protein_coding	-1.32726	0.00129903	0.0420928
AC107464.2	long_non_coding	1.60161	0.00130103	0.0421334
LINC02506	long_non_coding	-1.61003	0.00130291	0.0421702
XPNPEP2	protein_coding	-0.719995	0.00130978	0.0423441
CDH4	protein_coding	-0.948065	0.00131397	0.0423441
TMEM210	protein_coding	0.847158	0.00131428	0.0423441
ALOX15P2	pseudogene	-1.41668	0.00131184	0.0423441
RNA5SP123	ncRNA	1.16347	0.00131298	0.0423441
NCOA4P3	pseudogene	1.10832	0.00131336	0.0423441
FADS2P1	pseudogene	-1.91539	0.00131328	0.0423441
AC026355.3	pseudogene	1.63447	0.00131067	0.0423441
AC027279.4	TEC	2.12585	0.00131837	0.0424518
AC009365.2	long_non_coding	2.03769	0.00132586	0.0426446
RNF216-IT1	long_non_coding	1.16543	0.00132587	0.0426446
AL583722.4	long_non_coding	1.88892	0.00132746	0.0426712
AC090950.2	TEC	1.44805	0.0013339	0.0428277
TRAV13-2	TR	-0.796092	0.00133648	0.0428308
PDC	protein_coding	0.798388	0.00133923	0.042879
PLCH1-AS1	long_non_coding	1.07664	0.00134443	0.0430211
CDH12	protein_coding	-1.2967	0.00134612	0.0430309
OVCH1-AS1	long_non_coding	-1.15742	0.00134626	0.0430309
RNU11-2P	ncRNA	2.65747	0.0013502	0.0430836
AC013452.1	pseudogene	1.56634	0.00134927	0.0430836
RNA5SP282	ncRNA	2.52701	0.00135622	0.0432514
CHRNB3	protein_coding	-1.45654	0.0013618	0.0433246
KCNB2	protein_coding	-1.17235	0.0013616	0.0433246
AC090617.10	TEC	0.889773	0.00136099	0.0433246
AC006017.1	long_non_coding	0.714312	0.00136607	0.0433938
CDC42P1	pseudogene	1.44145	0.00136601	0.0433938
AC006023.1	pseudogene	1.53125	0.00137408	0.0436237
EMILIN1	protein_coding	0.614083	0.00137875	0.0437418
RBBP8P1	pseudogene	1.77487	0.00137935	0.0437418
AC021086.1	long_non_coding	0.614239	0.0013806	0.0437571
SCARNA4	ncRNA	1.2674	0.00138319	0.0438146
RN7SKP180	ncRNA	1.78095	0.00138636	0.0438829
AC093520.1	long_non_coding	-0.950621	0.00138801	0.0438829
AC009093.7	TEC	1.0675	0.00138846	0.0438829
AMH	protein_coding	0.987811	0.00139002	0.0439078
AC039056.2	long_non_coding	0.660696	0.00139238	0.0439577
AIPL1	protein_coding	-1.34984	0.00139702	0.0440722
CAMKV	protein_coding	1.08974	0.00140069	0.0440722
WWC3-AS1	long_non_coding	1.82815	0.00140067	0.0440722
AL590762.4	pseudogene	1.1993	0.00140001	0.0440722
AC007546.1	long_non_coding	0.645626	0.00139786	0.0440722
OTOS	protein_coding	1.26579	0.00140371	0.0441425
AL139400.1	pseudogene	1.8545	0.00141119	0.0443286
AL356414.1	long_non_coding	-1.2119	0.00141101	0.0443286
TIGD3	protein_coding	0.60402	0.00141531	0.0444331
AL445465.1	long_non_coding	1.76487	0.00141762	0.0444811
AL451054.1	pseudogene	0.896689	0.00141845	0.0444822
PAK3	protein_coding	-0.729926	0.0014203	0.0444909
GRID2	protein_coding	-1.30136	0.00143049	0.0447853
LCA10	long_non_coding	1.57822	0.00143472	0.0448928
CACNA2D1	protein_coding	-0.643895	0.00143884	0.0449968
SLC5A9	protein_coding	0.799826	0.00144384	0.0451084
CDKL2	protein_coding	-1.12851	0.001444	0.0451084
OAS3	protein_coding	-0.609007	0.00144524	0.0451219
A2M	protein_coding	-0.71714	0.00145049	0.0452609
ACAN	protein_coding	0.965543	0.00145192	0.0452804
SUGT1P2	pseudogene	0.649422	0.00145872	0.0454247
CCT4P2	pseudogene	1.67511	0.0014587	0.0454247
AC099340.1	pseudogene	1.23623	0.00145896	0.0454247
AC009088.1	long_non_coding	0.594391	0.00146113	0.0454672
PDZD4	protein_coding	0.921447	0.00146359	0.0454915
FLJ46284	long_non_coding	0.650652	0.00146432	0.0454915
AC092338.1	long_non_coding	0.78375	0.00146312	0.0454915
ACCSL	protein_coding	1.592	0.00146576	0.0455112
AC110792.1	pseudogene	0.83693	0.001468	0.0455556
AC135279.1	pseudogene	0.690911	0.00146928	0.0455703
LATS2-AS1	long_non_coding	2.62826	0.00147012	0.0455712
GRIN2B	protein_coding	-0.985138	0.00147189	0.0456011
AC137932.2	long_non_coding	0.609169	0.00147538	0.0456841
CD8A	protein_coding	-0.72298	0.00147869	0.0457129
AC092809.2	long_non_coding	0.767575	0.00147866	0.0457129
SOCS5P4	pseudogene	0.591823	0.00148332	0.0458297
UCN3	protein_coding	-1.86767	0.00149073	0.0460035
DPYD	protein_coding	-0.611319	0.00149139	0.0460035
AC007785.1	long_non_coding	0.892571	0.00149119	0.0460035
ZDHHC4P1	pseudogene	1.75065	0.00149238	0.0460088
AC243732.1	pseudogene	0.590707	0.00149925	0.0461953
MIR544B	ncRNA	1.71936	0.00150275	0.046278
AC010615.3	pseudogene	1.07678	0.00150514	0.0463264
RN7SL600P	ncRNA	0.841385	0.0015065	0.0463428
TAS2R50	protein_coding	1.2313	0.00150902	0.04637
COL20A1	protein_coding	0.988568	0.00151104	0.0463814
NCOA7-AS1	long_non_coding	2.27302	0.00151096	0.0463814
CLEC4G	protein_coding	-1.00105	0.00151368	0.0464372
AC027544.1	pseudogene	1.09569	0.00151687	0.0465101
LIFR	protein_coding	-0.729183	0.00152227	0.0466466
AC010886.1	pseudogene	1.89803	0.00152381	0.0466466
AL355922.5	long_non_coding	1.39163	0.00152338	0.0466466
AC090950.1	pseudogene	1.0704	0.00152884	0.046765
AC115085.1	pseudogene	0.883647	0.0015316	0.0467838
MATN2	protein_coding	-0.779393	0.00153625	0.046834
CHRFAM7A	protein_coding	-0.625076	0.00153703	0.046834
KARSP1	pseudogene	2.12019	0.00153587	0.046834
AL590609.2	pseudogene	0.68332	0.00154038	0.0468493
AC007098.1	pseudogene	2.23789	0.00153968	0.0468493
AC243773.3	long_non_coding	1.59152	0.00153978	0.0468493
ASTN2-AS1	long_non_coding	2.17697	0.00154359	0.0468965
NIP7P3	pseudogene	1.52321	0.0015474	0.0469618
ABCA4	protein_coding	1.07053	0.00154939	0.0469969
PI3	protein_coding	-1.31232	0.00155281	0.0470501
NXNL2	protein_coding	-0.686375	0.00155255	0.0470501
PRKCG	protein_coding	-0.760679	0.0015558	0.0471154
IFIH1	protein_coding	-0.606671	0.00155765	0.0471207
AC006270.2	pseudogene	1.80925	0.00155693	0.0471207
AC104446.1	pseudogene	0.686307	0.00155888	0.0471329
AC019070.1	pseudogene	2.46181	0.00155994	0.0471395
DCT	protein_coding	-0.8352	0.00156489	0.0472639
NOL4	protein_coding	-1.1503	0.0015671	0.0473054
AC098828.1	pseudogene	0.908994	0.00157035	0.0473527
AP003108.5	TEC	0.743894	0.00157023	0.0473527
VNN2	protein_coding	-0.813517	0.00157313	0.0473859
DAND5	protein_coding	0.603807	0.00157253	0.0473859
AL031666.2	long_non_coding	0.765241	0.00157507	0.0474191
AC096642.1	long_non_coding	0.598438	0.00157923	0.047519
BNIP3P16	pseudogene	0.747639	0.00158111	0.0475504
AC022022.2	pseudogene	3.03634	0.0015842	0.0476178
CLMAT3	long_non_coding	0.931509	0.0015868	0.0476707
ALG1L	protein_coding	0.892901	0.00159274	0.0478238
PALM	protein_coding	0.747691	0.00159369	0.0478268
AC018638.7	long_non_coding	0.608601	0.00159511	0.0478441
AL078599.2	long_non_coding	1.73993	0.00159759	0.0478677
LINC01395	long_non_coding	1.0645	0.0015975	0.0478677
RAB38	protein_coding	-0.730229	0.00160443	0.0480282
AC004039.1	long_non_coding	0.676871	0.00160465	0.0480282
AL163193.1	pseudogene	1.75256	0.00161014	0.0481668
AL020997.2	long_non_coding	0.843308	0.0016118	0.0481911
IGHV1-2	IG	-1.2054	0.00161389	0.0482281
TOX2	protein_coding	-0.606587	0.00162385	0.0483466
BX842568.3	pseudogene	0.70917	0.00162197	0.0483466
AC023794.5	long_non_coding	0.753691	0.00162369	0.0483466
ARL14EPL	protein_coding	-1.28593	0.00162096	0.0483466
AC025811.1	long_non_coding	1.17904	0.00161998	0.0483466
SMIM5	protein_coding	0.719276	0.00162526	0.0483631
SPINK13	protein_coding	-1.20525	0.0016301	0.04844
AP001207.2	pseudogene	1.16694	0.00162886	0.04844
AP003355.2	long_non_coding	1.12452	0.00163042	0.04844
SIX3	protein_coding	1.11113	0.00163137	0.0484426
AC103769.1	long_non_coding	1.04943	0.00163271	0.048457
C4A	protein_coding	-0.912553	0.00163459	0.0484875
YY1P1	pseudogene	1.97776	0.00163597	0.0485027
AL133245.1	long_non_coding	0.814663	0.00164216	0.0486352
AC022898.1	long_non_coding	1.21404	0.00164643	0.0487106
AC105129.1	pseudogene	1.38548	0.00165119	0.0488079
AC007620.3	long_non_coding	0.736805	0.00165343	0.0488154
SNORA36	ncRNA	1.21027	0.00165473	0.0488284
DDX18P5	pseudogene	1.28043	0.00165862	0.0488489
AC011445.2	long_non_coding	0.678013	0.00165889	0.0488489
AC068491.3	long_non_coding	1.0993	0.00165802	0.0488489
S100A2	protein_coding	1.11162	0.00166112	0.0488893
ERC2	protein_coding	-0.739934	0.00167307	0.0491788
AP000842.2	long_non_coding	-1.3453	0.00167357	0.0491788
AC087276.4	long_non_coding	1.4752	0.00167298	0.0491788
AC096734.1	long_non_coding	-1.03235	0.00167452	0.0491811
FCGR3B	protein_coding	-0.868536	0.00167684	0.0492235
AL645941.2	protein_coding	-0.793878	0.00167968	0.0492813
AC090772.2	long_non_coding	1.54343	0.00168158	0.0493116
UPP2	protein_coding	0.781973	0.00168451	0.0493421
SLURP1	protein_coding	1.09395	0.0016874	0.0493796
RASL10A	protein_coding	0.59997	0.00168942	0.0493909
AL590666.1	long_non_coding	0.620178	0.00169141	0.0493909
AP000919.2	long_non_coding	1.18947	0.00169102	0.0493909
AC010328.1	long_non_coding	0.94437	0.00169023	0.0493909
SLC6A14	protein_coding	-1.05407	0.00169454	0.0494349
AL365356.3	long_non_coding	0.953572	0.00170211	0.0496302
LINC01814	long_non_coding	0.81289	0.00170689	0.0497437
IL1RAPL1	protein_coding	-1.22648	0.00171	0.0497635
RN7SKP71	ncRNA	2.6126	0.00171079	0.0497635
RASD1	protein_coding	0.7582	0.00171534	0.0498101
AL512593.1	pseudogene	2.63037	0.00171458	0.0498101
KLF4P1	pseudogene	2.22224	0.00171763	0.0498511
LILRP2	pseudogene	-0.864212	0.00172094	0.0499215
RNU6-720P	ncRNA	1.13718	0.00172335	0.04994
AC011453.1	long_non_coding	-0.912073	0.00172286	0.04994
ADRA1B	protein_coding	-0.759319	0.00172576	0.0499471
RN7SL736P	ncRNA	2.07045	0.00172625	0.0499471

## Sheet: supplementary table 6
Supplementary Table 6. GSEA analysis of differentially expressed genes between high-risk and low-risk groups in TCGA-TNBC cohort
ID	Description	setSize	enrichmentScore	NES	pvalue	p.adjust	qvalues	rank	leading_edge	core_enrichment
hsa04060	Cytokine-cytokine receptor interaction	37	-0.51374	-2.55147	3.09092e-06	0.000142182	5.85648e-05	413	tags=89%, list=38%, signal=57%	51561/3574/9966/3977/970/3594/6368/958/3561/3600/8807/6375/55504/10663/6355/3596/133396/6361/1437/10563/6357/6352/356/650/55801/1439/3598/3579/83729/3458/4982/6374/6372
hsa04612	Antigen processing and presentation	16	-0.615602	-2.34312	0.000244903	0.00293287	0.00120805	426	tags=100%, list=39%, signal=62%	3123/972/4261/925/3117/3122/3113/3127/3111/3821/3805/927/3117/3118/3458/3809
hsa05164	Influenza A	16	-0.615602	-2.34312	0.000244903	0.00293287	0.00120805	426	tags=100%, list=39%, signal=62%	64135/4940/3123/4261/3117/3122/3113/3127/3111/6352/356/3117/3118/3458/5645/5644
hsa05168	Herpes simplex virus 1 infection	15	-0.615023	-2.28295	0.000266291	0.00293287	0.00120805	426	tags=100%, list=39%, signal=61%	64135/4940/3123/972/3117/3122/3113/3127/3111/7712/6352/356/3117/3118/3458
hsa04640	Hematopoietic cell lineage	15	-0.610329	-2.26552	0.00031879	0.00293287	0.00120805	431	tags=100%, list=40%, signal=61%	3108/3123/3574/925/3117/3122/4254/3113/3127/1437/3111/927/3117/3118/909
hsa05321	Inflammatory bowel disease	14	-0.614447	-2.23547	0.000522628	0.00369478	0.00152188	426	tags=100%, list=39%, signal=61%	51561/3123/3117/3122/3594/3561/8807/3113/3596/3127/3111/3117/3118/3458
hsa05330	Allograft rejection	13	-0.613871	-2.2233	0.000700477	0.00369478	0.00152188	426	tags=100%, list=39%, signal=61%	3123/3117/3122/958/3113/3127/3111/5551/356/3002/3117/3118/3458
hsa05332	Graft-versus-host disease	13	-0.613871	-2.2233	0.000700477	0.00369478	0.00152188	426	tags=100%, list=39%, signal=61%	3123/3117/3122/3113/3127/3111/3821/5551/356/3002/3117/3118/3458
hsa05145	Toxoplasmosis	13	-0.611996	-2.21651	0.000722892	0.00369478	0.00152188	428	tags=100%, list=40%, signal=61%	3108/3123/4261/3117/3122/958/3113/3127/3111/3909/3117/3118/3458
hsa04650	Natural killer cell mediated cytotoxicity	13	-0.584054	-2.11531	0.00140787	0.00568121	0.00234009	393	tags=92%, list=36%, signal=59%	2534/5582/117157/9437/2215/1437/3821/5551/356/3002/3458/3809
hsa04658	Th1 and Th2 cell differentiation	12	-0.613296	-2.15027	0.00148205	0.00568121	0.00234009	426	tags=100%, list=39%, signal=61%	3123/3117/3122/3594/3561/3113/3596/3127/3111/3117/3118/3458
hsa04659	Th17 cell differentiation	12	-0.613296	-2.15027	0.00148205	0.00568121	0.00234009	426	tags=100%, list=39%, signal=61%	51561/3123/3117/3122/3594/3561/3113/3127/3111/3117/3118/3458
hsa04080	Neuroactive ligand-receptor interaction	27	-0.45472	-2.01872	0.0018729	0.00662718	0.00272973	247	tags=56%, list=23%, signal=44%	3001/2904/1268/153/1139/2895/1142/2567/3358/5737/5645/796/114131/5644/1081
hsa05323	Rheumatoid arthritis	16	-0.543714	-2.0695	0.00208364	0.00684625	0.00281996	426	tags=94%, list=39%, signal=58%	3108/51561/3123/3117/3122/3600/3113/3127/1437/3111/6352/3117/3118/3458/6374/6372
hsa05320	Autoimmune thyroid disease	14	-0.56398	-2.05187	0.00302422	0.0084907	0.00349731	347	tags=93%, list=32%, signal=64%	3108/3123/3117/3122/958/3113/3127/3111/5551/356/3002/3117/3118/1081
hsa05310	Asthma	11	-0.612722	-2.0771	0.00330065	0.0084907	0.00349731	426	tags=100%, list=39%, signal=61%	3123/3117/3122/958/3113/3596/2205/3127/3111/3117/3118
hsa05416	Viral myocarditis	11	-0.612722	-2.0771	0.00330065	0.0084907	0.00349731	426	tags=100%, list=39%, signal=61%	3123/2534/3117/3122/958/3113/3127/3111/5551/3117/3118
hsa05169	Epstein-Barr virus infection	10	-0.61215	-2.03466	0.00332245	0.0084907	0.00349731	426	tags=100%, list=39%, signal=61%	4940/3123/3117/3122/958/3113/3127/3111/3117/3118
hsa04062	Chemokine signaling pathway	15	-0.536084	-1.98993	0.00363308	0.00859828	0.00354163	334	tags=80%, list=31%, signal=56%	6368/6375/10663/6355/6361/10563/6357/6352/3579/6374/114/6372
hsa04514	Cell adhesion molecules	18	-0.501814	-2.0047	0.00373838	0.00859828	0.00354163	431	tags=89%, list=40%, signal=55%	3684/3108/3123/925/3117/3122/958/3113/5133/3127/1002/3111/7412/927/3117/3118/9074
hsa05152	Tuberculosis	21	-0.468398	-1.95447	0.00413608	0.00877425	0.00361411	456	tags=91%, list=42%, signal=54%	9902/3684/3108/51561/3123/972/4261/3656/3117/3122/4360/2215/3113/64581/3127/3111/26253/3117/3118/3458
hsa05166	Human T-cell leukemia virus 1 infection	14	-0.551636	-2.00696	0.00419638	0.00877425	0.00361411	426	tags=93%, list=39%, signal=57%	3108/3123/3117/3122/958/3561/3600/3113/3127/1437/3111/3117/3118/114
hsa04940	Type I diabetes mellitus	13	-0.535606	-1.93985	0.00532327	0.0106465	0.0043853	426	tags=93%, list=39%, signal=57%	3108/3123/3117/3122/3113/3127/3111/5551/356/3002/3117/3118/3458
hsa04061	Viral protein interaction with cytokine and cytokine receptor	14	-0.531959	-1.93537	0.00702067	0.0134563	0.00554264	334	tags=86%, list=31%, signal=60%	6368/3561/8807/6375/6355/6361/10563/6357/6352/3579/6374/6372
hsa05150	Staphylococcus aureus infection	17	-0.450287	-1.74101	0.0118739	0.021848	0.00899918	431	tags=89%, list=40%, signal=54%	3684/3108/3123/5724/3117/3122/2358/716/2215/3113/720/3127/3111/3117/3118/3860
